# Supplementary material for: Genesis and spread of multiple reassortants during the 2016/2017 H5 avian influenza epidemic in Eurasia
Source: PubMed Central journal article supplement — Proc Natl Acad Sci U S A. 2020 Aug 7;117(34):20814–25. doi: 10.1073/pnas.2001813117 (PMC7456104; doi:10.1073/pnas.2001813117), 2020-08-07
Supplement: pnas.2001813117.sapp01.pdf [file pnas.2001813117.sapp01.pdf]

# PNAS

[www.pnas.org](http://www.pnas.org)

Supplementary Information for:

Genesis and spread of multiple reassortants during the 2016/2017 H5 avian influenza epidemic in Eurasia

Samantha J. Lycett, Anne Pohlmann, Christoph Staubach, Valentina Caliendo, Mark Woolhouse, Martin Beer, Thijs Kuiken, for the Global Consortium for H5N8 and Related Influenza Viruses (full list of authors below)

Thijs Kuiken  
Email: [t.kuiken@erasmusmc.nl](mailto:t.kuiken@erasmusmc.nl)

**This PDF file includes:**

Figures S1 to S13  
Tables S1 to S8  
Legends for Movie S1

**Other supplementary materials for this manuscript include the following:**

Movie S1

Maps in Figures S1 to S6 were created using ArcGIS® software by Esri. ArcGIS® and ArcMap™ are the intellectual property of Esri and are used herein under license. Copyright © Esri. All rights reserved. Any use of trade, firm, or product names is for descriptive purposes only and does not imply endorsement by the U.S. Government.

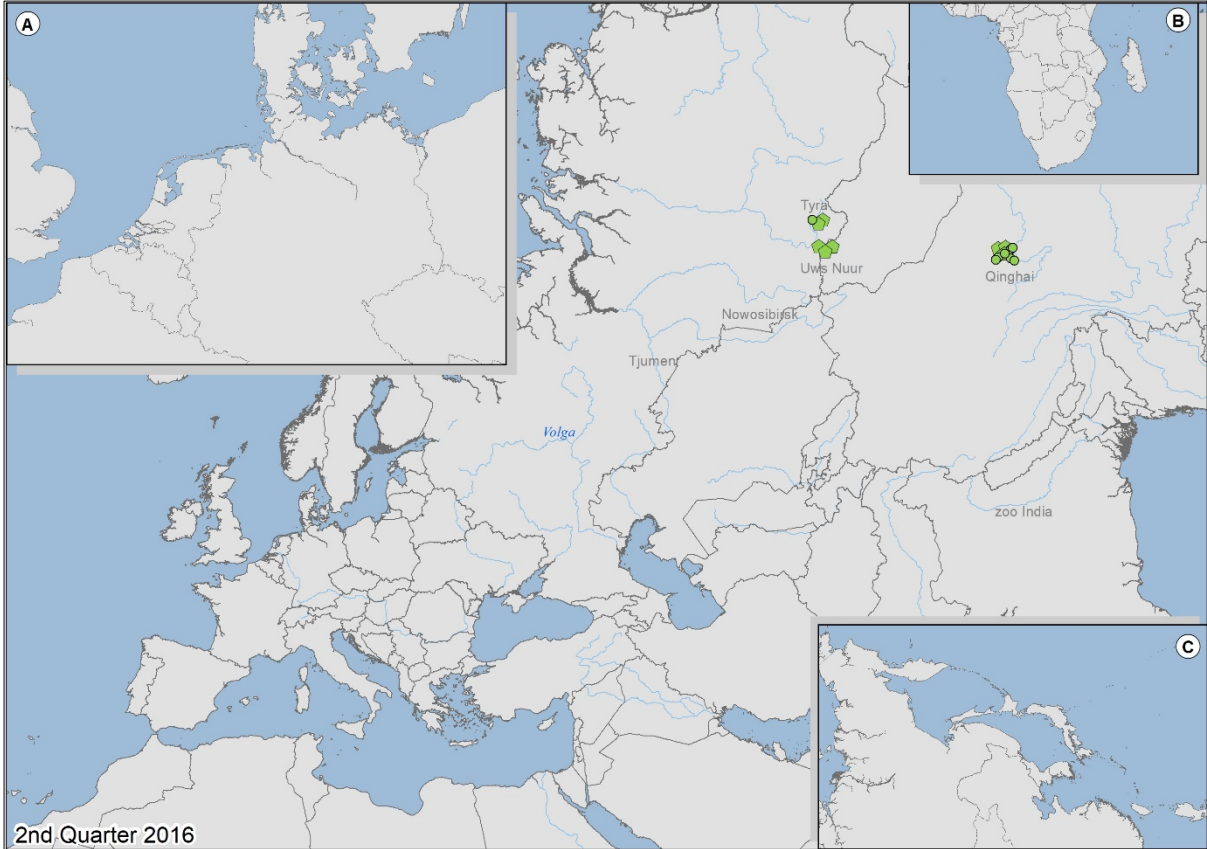

**Fig. S1.** H5NX HPAI viruses with full genome sequences detected in second quarter of 2016. The first viruses, all reassortant #1, were detected in wild birds in West Asia. Light green: reassortant #1. Dark green: reassortant #2. Red: reassortant #3. Purple: reassortant #4. Orange: reassortant #5. Light blue: reassortant #6. Dark blue: reassortant #7. Circle: Wild-ans. Square: Wild-ans-long. Pentagon: Wild-other. Rhomboid: Dom-ans. Triangle: Dom-gal. Inserts shows magnified maps of (a) the Northwest coast of Europe, (b) Southern Africa and (c) the East coast of Asia. Lambert conformal conic projection. Map images credit: Copyright © 1995–2020 Esri. All rights reserved. Published in the United States of America.

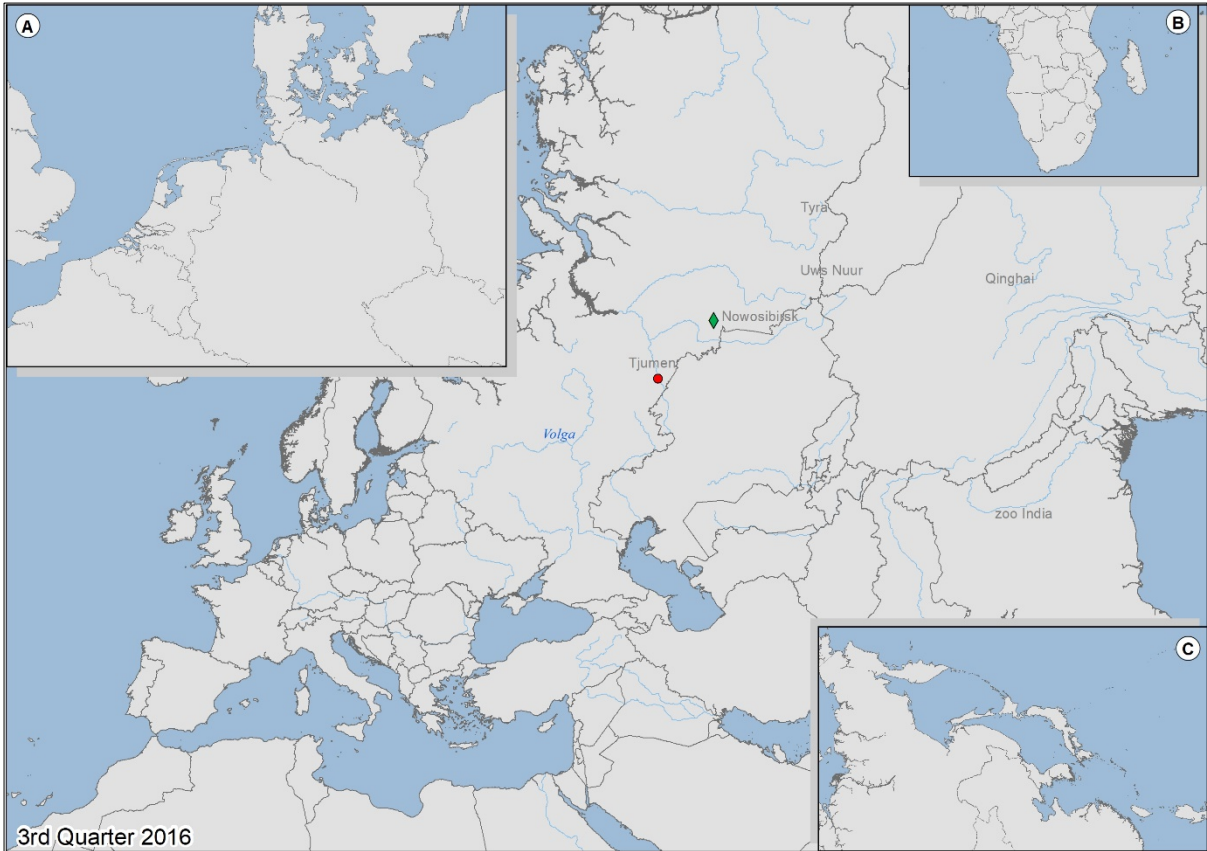

**Fig. S2.** H5NX HPAI viruses with full genome sequences detected in third quarter of 2016. Individual viruses of reassortants #2 and #3 were detected in wild birds at the border between Asia and Europe. For legend, see Fig. S1. Inserts show magnified maps of (a) the Northwest coast of Europe, (b) Southern Africa and (c) the East coast of Asia. Lambert conformal conic projection. Map images credit: Copyright © 1995–2020 Esri. All rights reserved. Published in the United States of America.

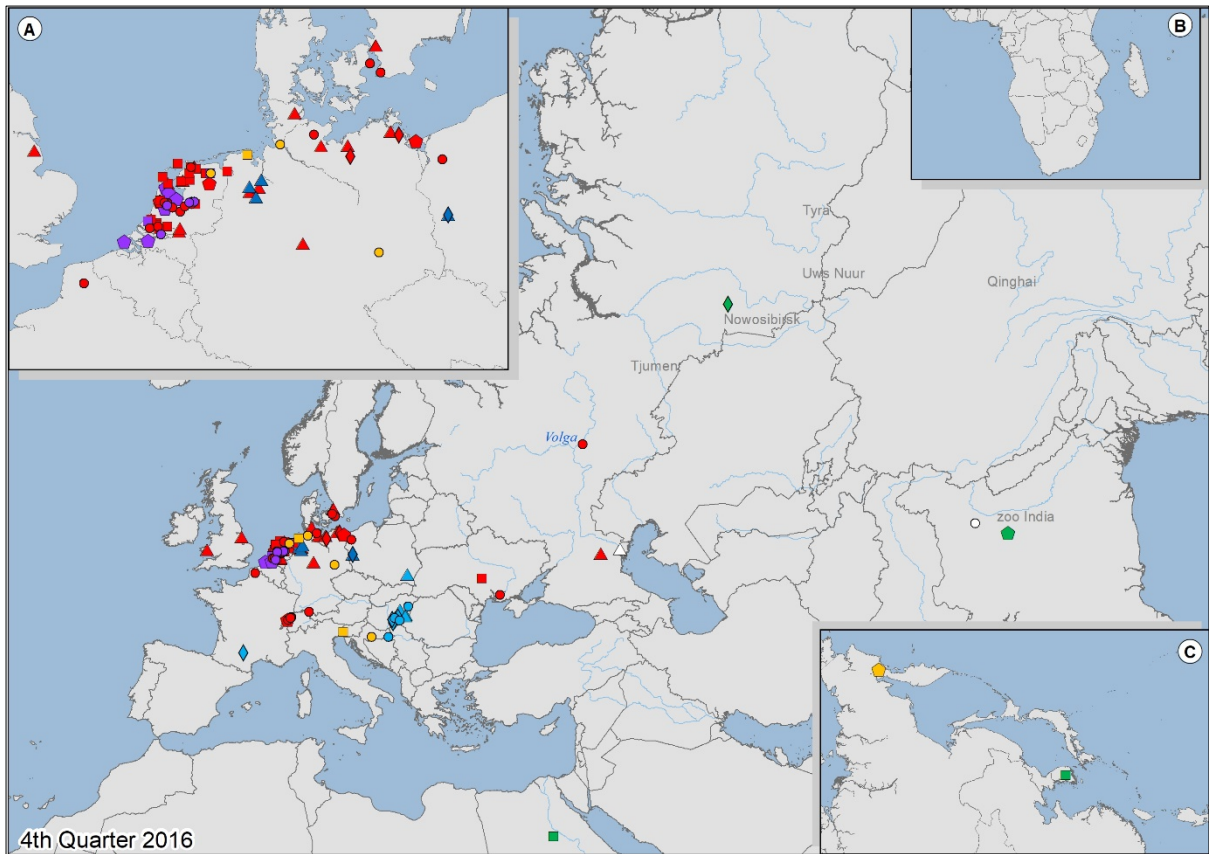

**Fig. S3.** H5NX HPAI viruses with full genome sequences detected in fourth quarter of 2016. Many viruses of reassortants #3, #4, #5, #6, and #7 were detected both in wild birds and poultry in different parts of Europe. A few viruses of reassortant #2 are detected in Northern Africa, South Asia, and East Asia, mainly in wild birds, but also in poultry. A virus of reassortant #3 was detected in a wild bird in east Asia. For legend, see Fig. S1. Inserts show magnified maps of (a) the Northwest coast of Europe, (b) Southern Africa and (c) the East coast of Asia. Lambert conformal conic projection. Map images credit: Copyright © 1995–2020 Esri. All rights reserved. Published in the United States of America.

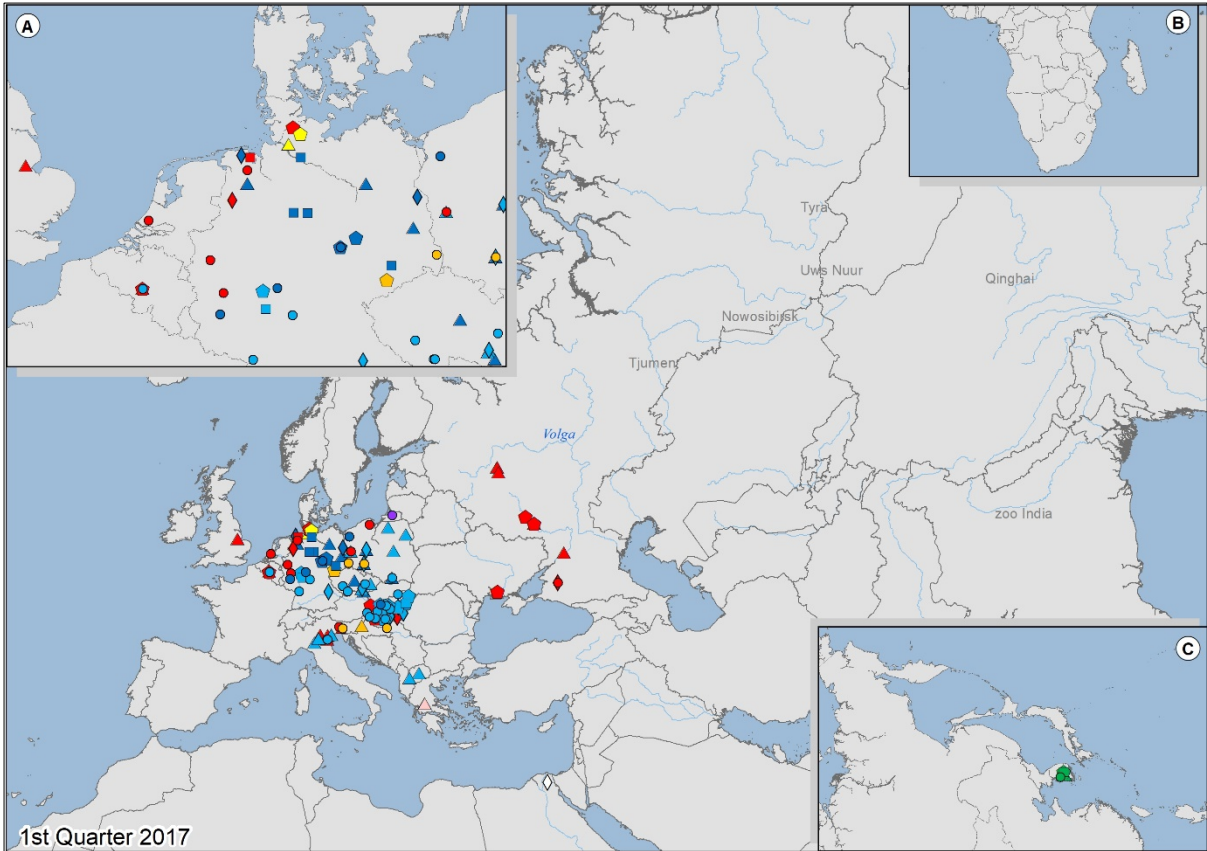

**Fig. S4.** H5NX HPAI viruses with full genome sequences detected in first quarter of 2017. Many viruses of reassortants #3, #4, #5, #6, and #7 were detected both in wild birds and poultry in different parts of Europe. A few viruses of reassortant #2 were detected in wild birds in East Asia. For legend, see Fig. S1. Inserts show magnified maps of (a) the Northwest coast of Europe, (b) Southern Africa and (c) the East coast of Asia. Lambert conformal conic projection. Map images credit: Copyright © 1995–2020 Esri. All rights reserved. Published in the United States of America.

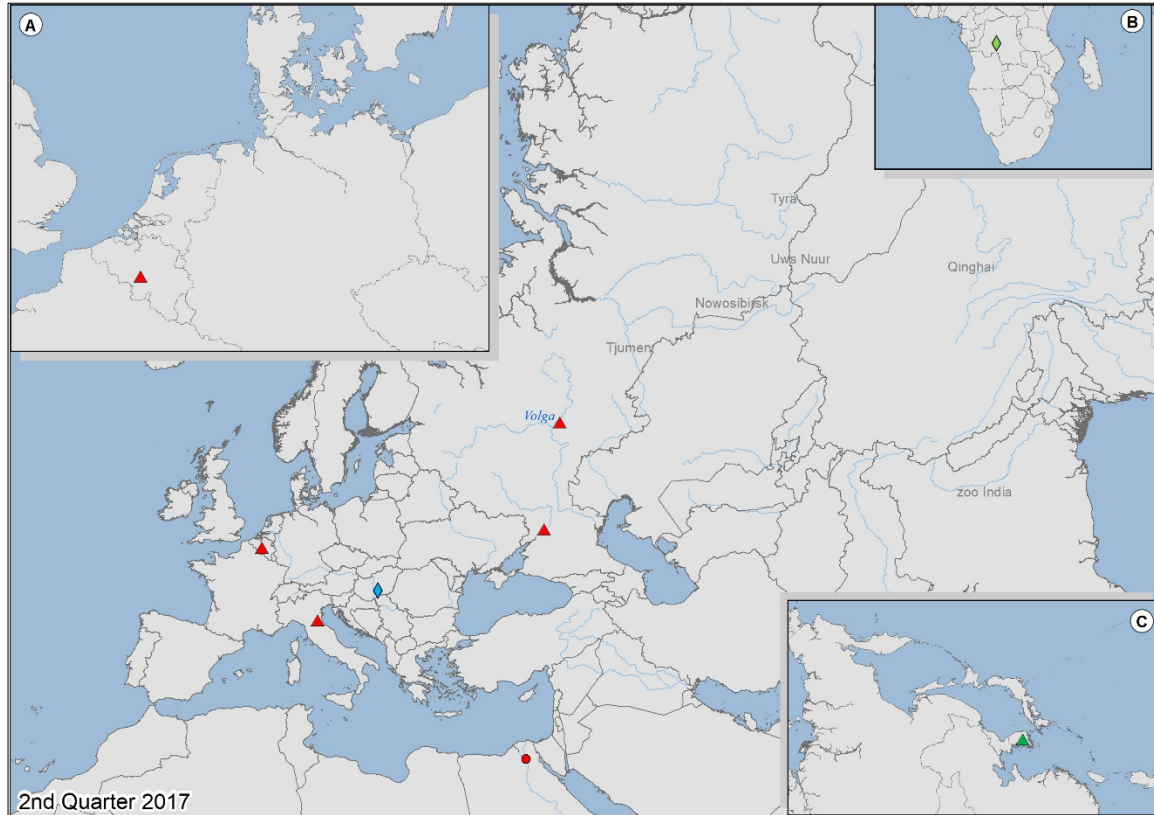

**Fig. S5.** H5NX HPAI viruses with full genome sequences detected in second quarter of 2017. A few viruses of reassortant #3 were detected in poultry in different parts of Europe. Two viruses of reassortant #2 are detected in captive birds in central Africa and in poultry in East Asia. A virus of reassortant #6 was detected in captive birds in central Europe. For legend, see Fig. S1. Inserts show magnified maps of (a) the Northwest coast of Europe, (b) Southern Africa and (c) the East coast of Asia. Lambert conformal conic projection. Map images credit: Copyright © 1995–2020 Esri. All rights reserved. Published in the United States of America.

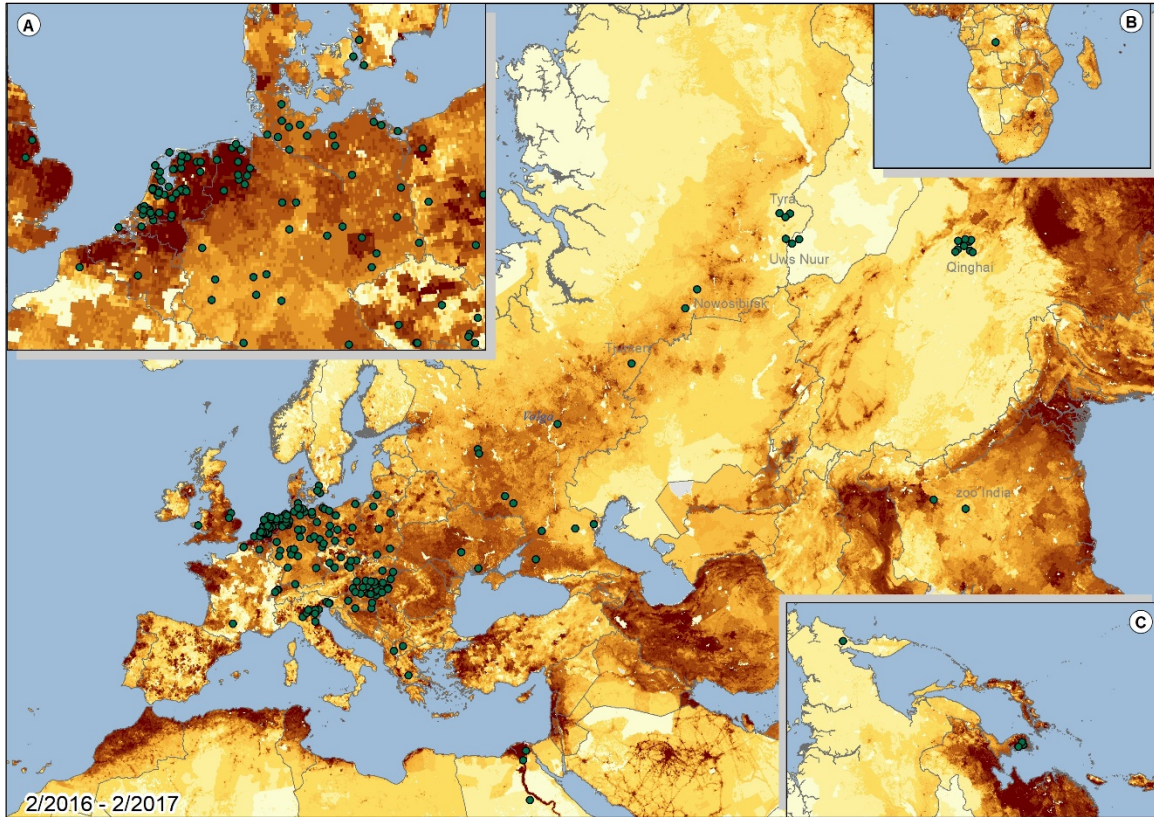

**Fig. S6.** Relationship between poultry density and H5NX HPAI viruses with full genome sequences detected between the second quarter of 2016 and second quarter of 2017. The figure indicates that there is no apparent spatial association between the two. Inserts show magnified maps of (a) the Northwest coast of Europe, (b) Southern Africa and (c) the East coast of Asia. Lambert conformal conic projection. Map images credit: Copyright © 1995–2020 Esri. All rights reserved. Published in the United States of America.

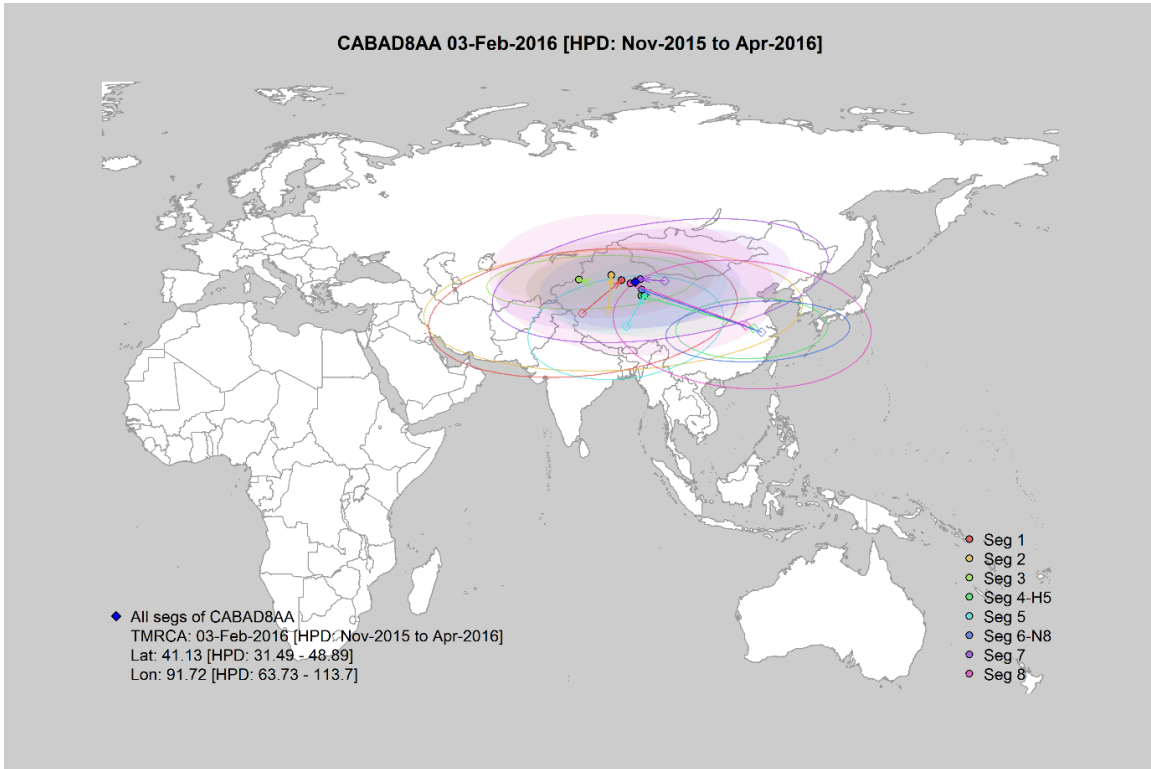

Origin map of CABAD8AA

Origin time at MRCA (TMRCA)

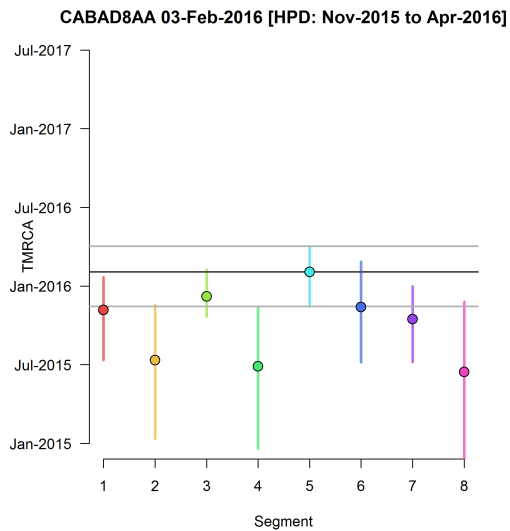

Inferred Host at MRCA and Grand Ancestor

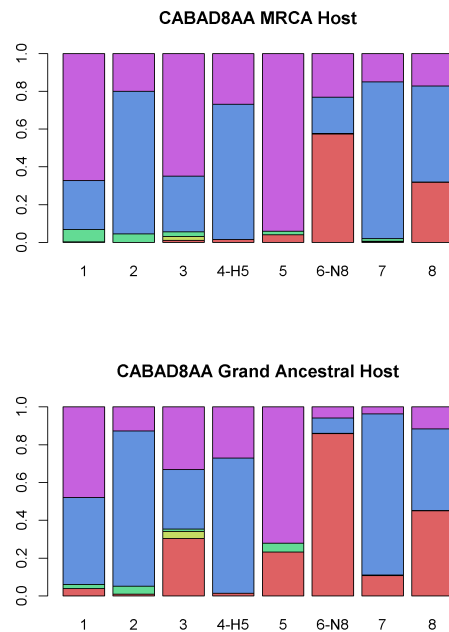

Fig. S7. Location of origin, date of origin, and inferred hosts of the most recent common ancestor (MRCA) and grand ancestor of reassortant #1 (CABAD8AA). For the inferred hosts: blue, long-distance wild anseriform birds; dark green, other wild anseriform birds; violet, other wild birds; red, domestic anseriform birds; light green, domestic galliform birds. Origin map: filled circles are



the origin estimates per segment (shaded ovals are the highest posterior density [HPD] confidence intervals); open diamonds are the location estimates of the grand ancestors (large open ovals are the confidence intervals); arrows show the inferred direction of from the grand ancestor to the origin estimates. Blue diamond: median origin estimate of the segments. Equirectangular projection.

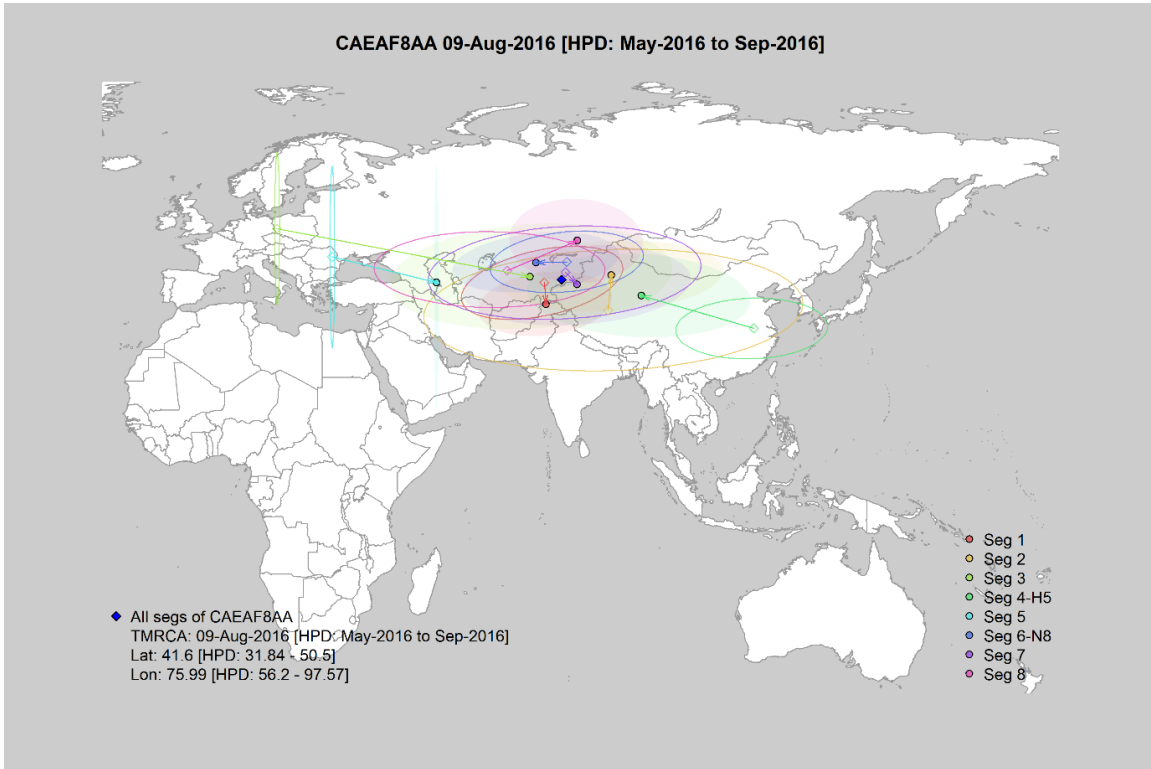

Origin map of CAEAF8AA

Origin time at MRCA (TMRCA)

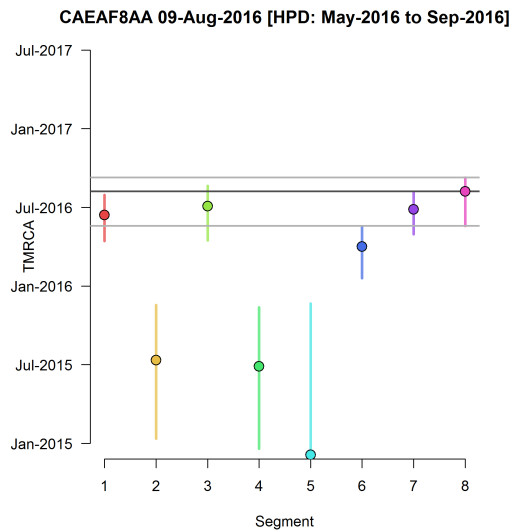

Inferred Host at MRCA and Grand Ancestor

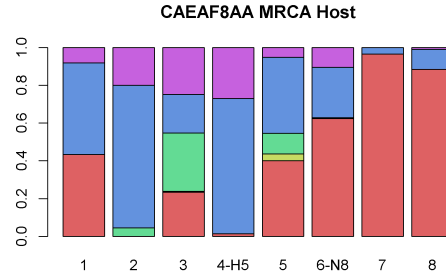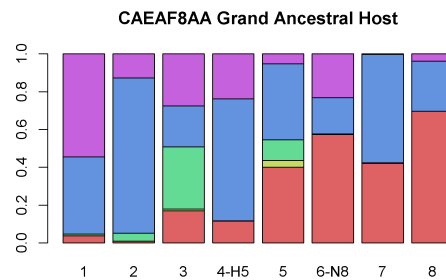

**Fig. S8.** Location of origin, date of origin, and inferred hosts of the most recent common ancestor (MRCA) and grand ancestor of reassortant #2 (CAEAF8AA). Legend for inferred hosts and elements of the origin map: see Fig. S7. Equirectangular projection.

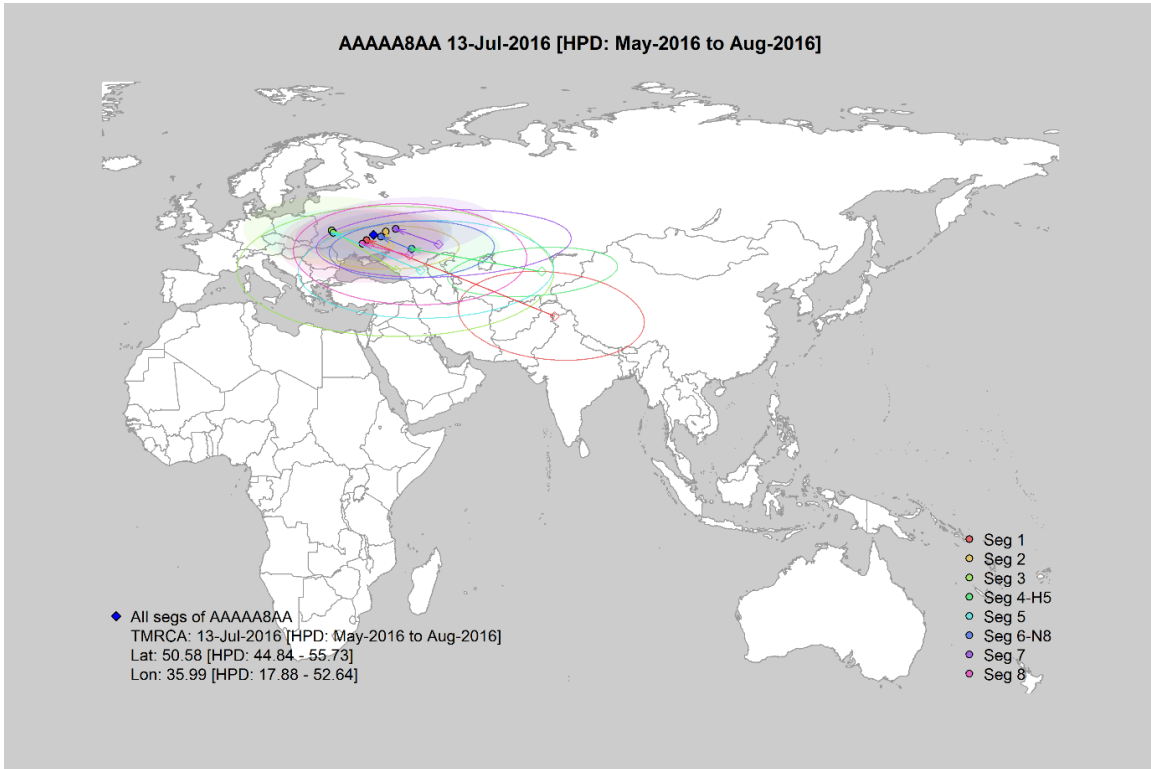

Origin map of AAAAA8AA

Origin time at MRCA (TMRCA)

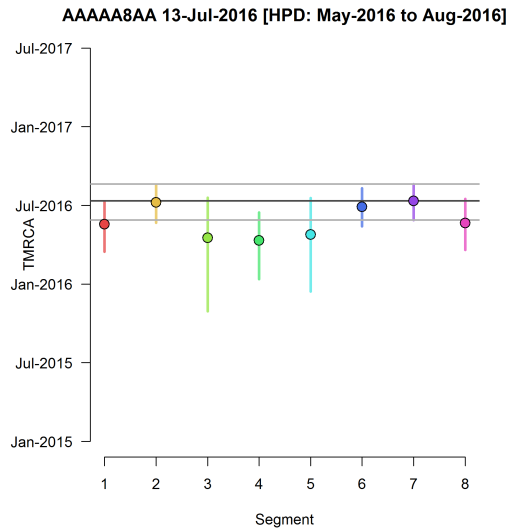

Inferred Host at MRCA and Grand Ancestor

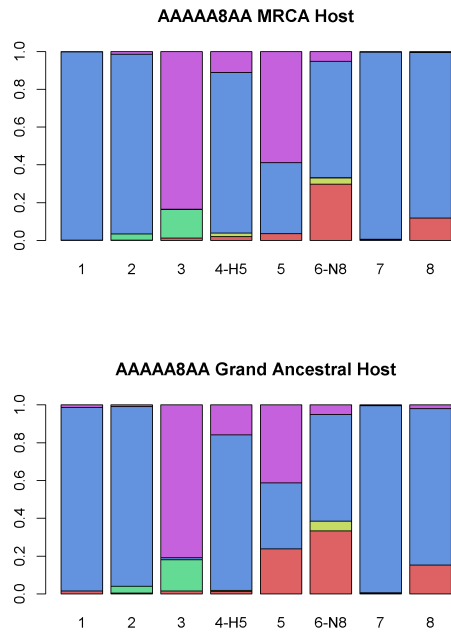

**Fig. S9.** Location of origin, date of origin, and inferred hosts of the most recent common ancestor (MRCA) and grand ancestor of reassortant #3 (AAAAA8AA). Legend for inferred hosts and elements of the origin map: see Fig. S7. Equirectangular projection.

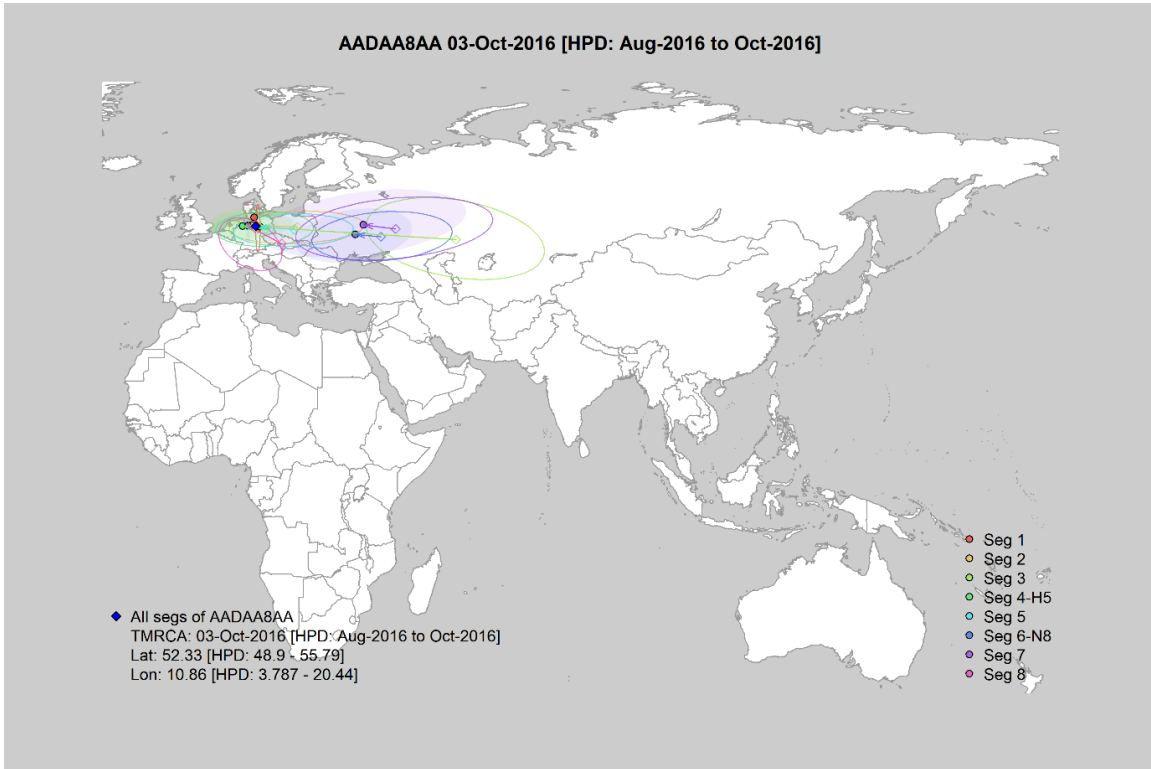

Origin map of AADAA8AA

Origin time at MRCA (TMRCA)

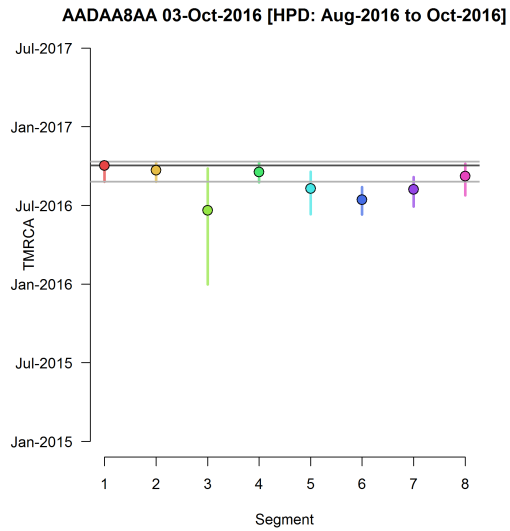

Inferred Host at MRCA and Grand Ancestor

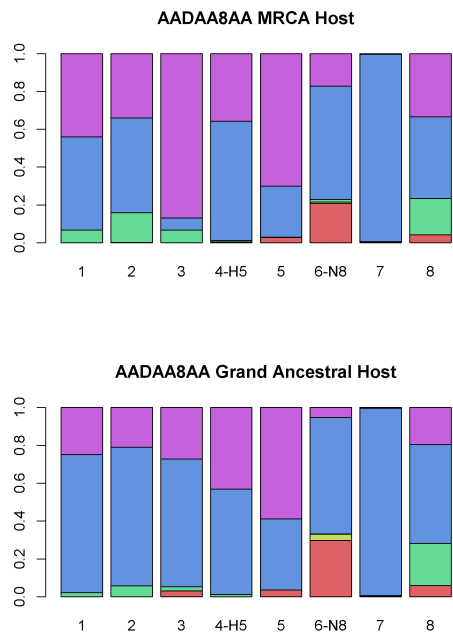

**Fig. S10.** Location of origin, date of origin, and inferred hosts of the most recent common ancestor (MRCA) and grand ancestor of reassortant #4 (AADAA8AA). Legend for inferred hosts and elements of the origin map: see Fig. S7. Equirectangular projection.

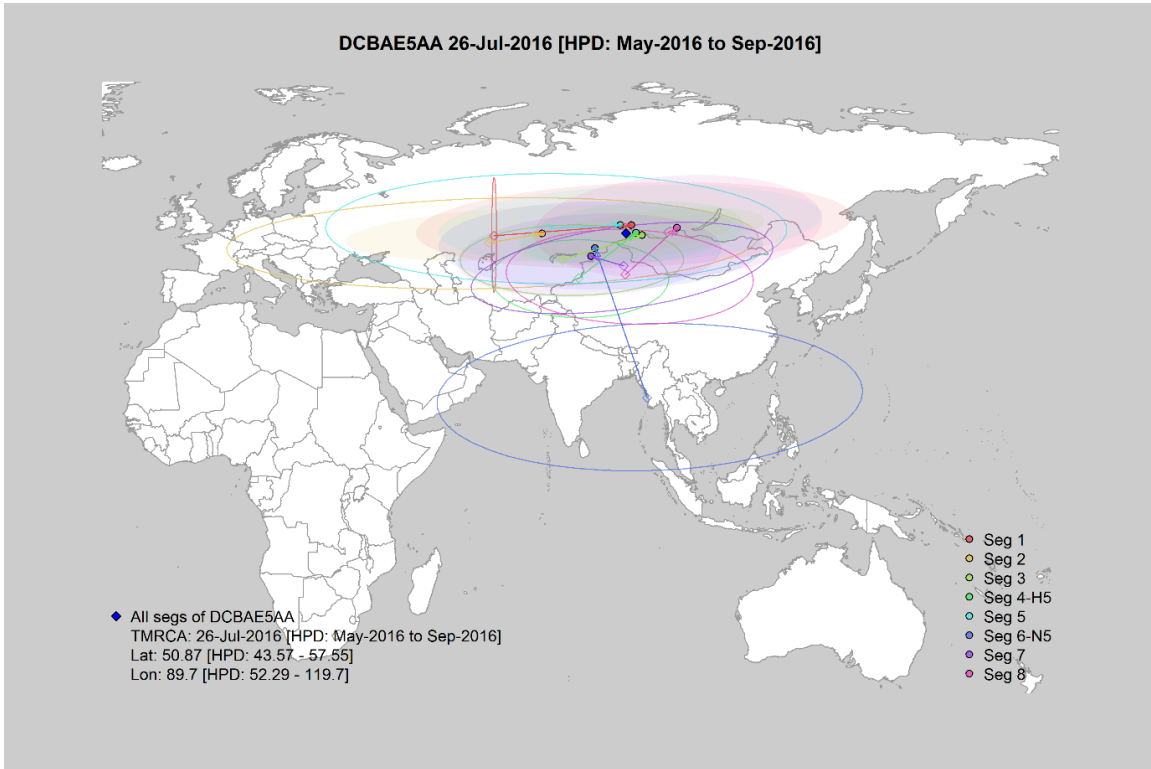

Origin map of DCBAE5AA

Origin time at MRCA (TMRCA)

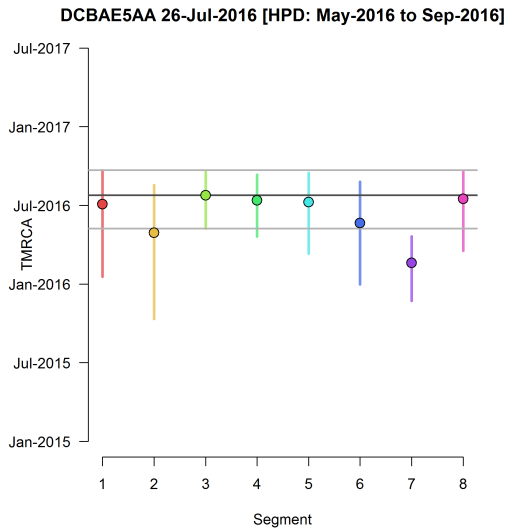

Inferred Host at MRCA and Grand Ancestor

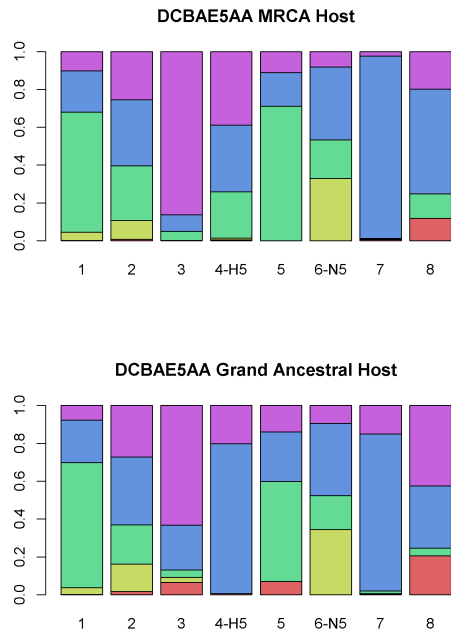

**Fig. S11.** Location of origin, date of origin, and inferred hosts of the most recent common ancestor (MRCA) and grand ancestor of reassortant #5 (DCBAE5AA). Legend for inferred hosts and elements of the origin map: see Fig. S7. Equirectangular projection.

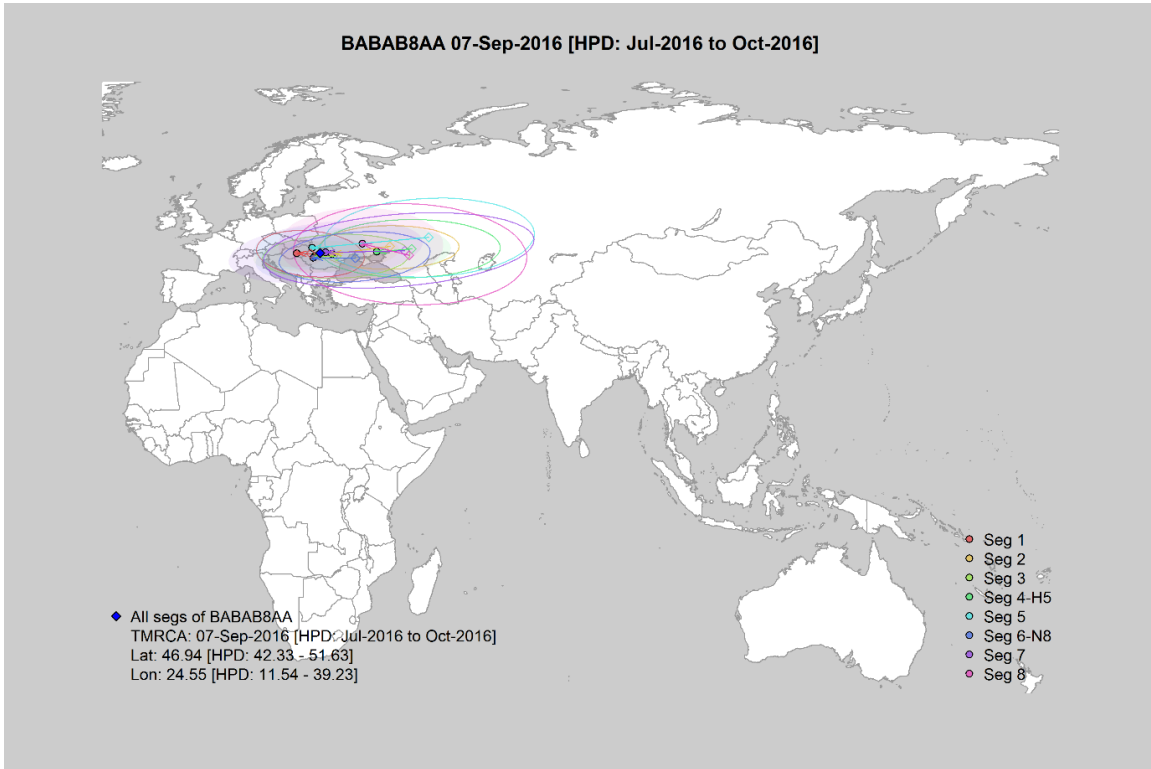

Origin map of BABAB8AA

Origin time at MRCA (TMRCA)

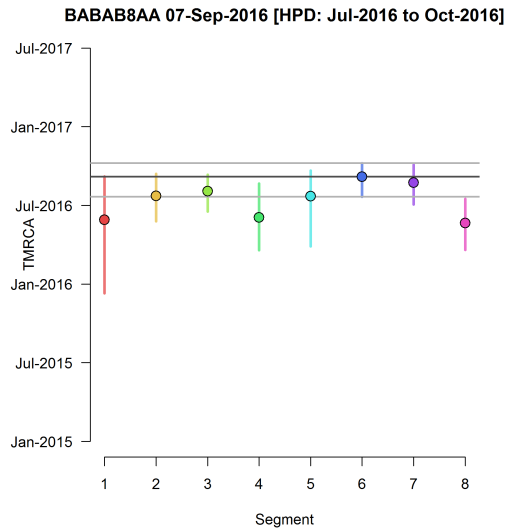

Inferred Host at MRCA and Grand Ancestor

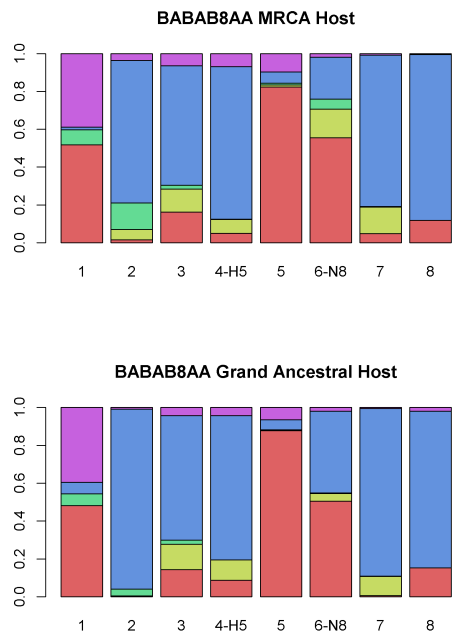

**Fig. S12.** Location of origin, date of origin, and inferred hosts of the most recent common ancestor (MRCA) and grand ancestor of reassortant #6 (BABAB8AA). Legend for inferred hosts and elements of the origin map: see Fig. S7. Equirectangular projection.

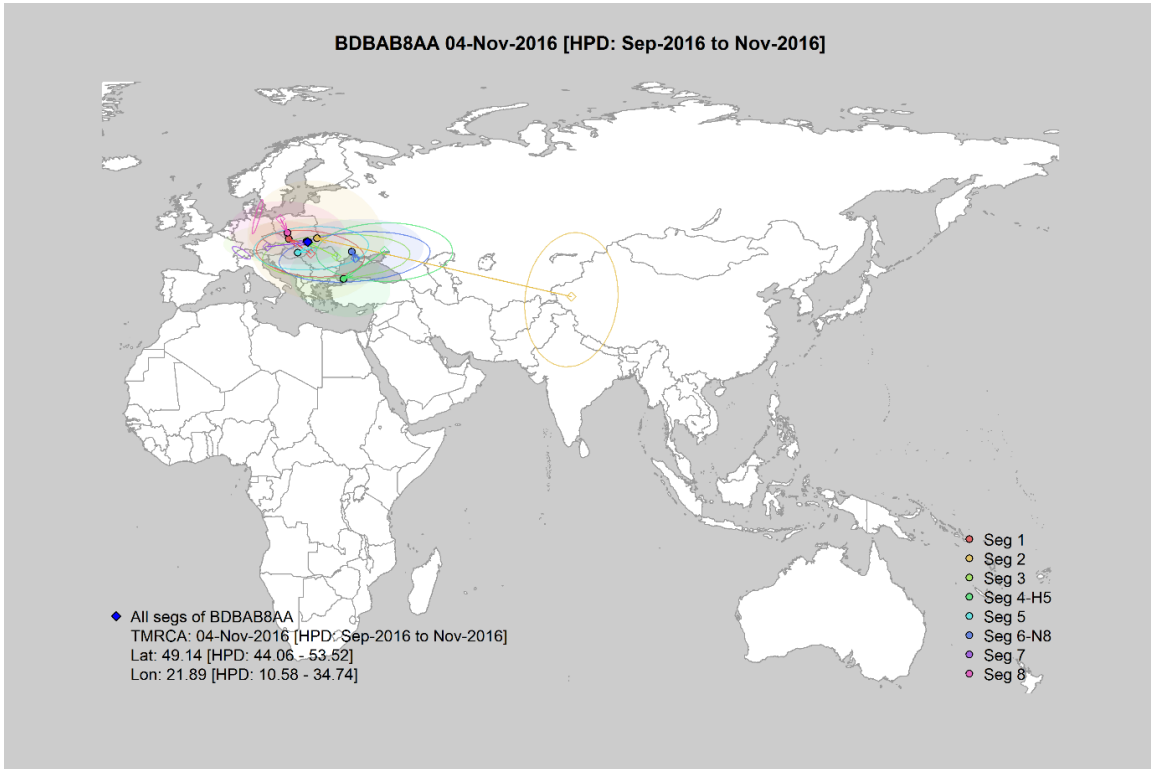

Origin map of BDBAB8AA

Origin time at MRCA (TMRCA)

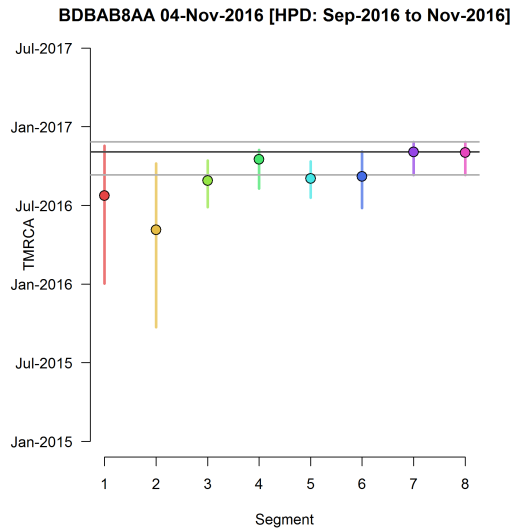

Inferred Host at MRCA and Grand Ancestor

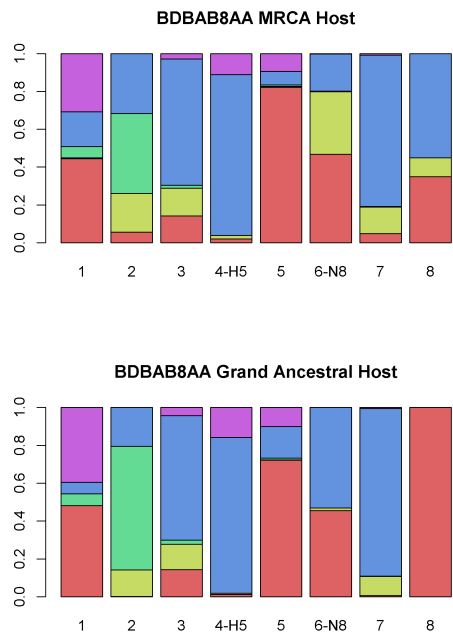

**Fig. S13.** Location of origin, date of origin, and inferred hosts of the most recent common ancestor (MRCA) and grand ancestor of reassortant #7 (BDBAB8AA). Legend for inferred hosts: see Fig. S7. Equirectangular projection.

**Table S1.** Categorisation of Asia and Europe into geographical subregions

| Region | Subregion        | Country or dependency                                                                                                                                                                                                                                        |
|--------|------------------|--------------------------------------------------------------------------------------------------------------------------------------------------------------------------------------------------------------------------------------------------------------|
| Asia   | Central          | Kazakhstan, Kyrgyzstan, Tajikistan, Turkmenistan, and Uzbekistan                                                                                                                                                                                             |
|        | East             | China, Hong Kong, Macau, Japan, Mongolia, North Korea, South Korea, Taiwan                                                                                                                                                                                   |
|        | North            | Siberia, Ural, Russian Far East                                                                                                                                                                                                                              |
|        | South            | Afghanistan, Bangladesh, Bhutan, Maldives, Nepal, India, Pakistan, Sri Lanka                                                                                                                                                                                 |
|        | South-East       | Northeast India (part of India east of Siliguri Corridor), Vietnam, Laos, Cambodia, Thailand, Myanmar, Malaysia, Andaman Islands, Nicobar Islands, Indonesia, Singapore, the Philippines, East Timor, Brunei, Christmas Island, Cocos (Keeling) Islands      |
|        | West             | Abkhazia, Armenia, Artsakh, Azerbaijan, Bahrain, Cyprus, Egypt (Sinai Peninsula), Iran, Iraq, Israel, Jordan, Kuwait, Lebanon, Northern Cyprus, Oman, Palestine, Qatar, Saudi Arabia, South Ossetia, Syria, Turkey (Asian part), United Arab Emirates, Yemen |
| Europe | Central and East | Albania, Belarus, Bosnia/Herzegovina, Bulgaria, Croatia, Czech Republic, Georgia, Hungary, Moldova, Montenegro, Poland, Romania, Russia (west of Ural Mountains), Serbia, Slovakia, Slovenia, Ukraine                                                        |
|        | North            | Denmark, Estonia, Finland, Iceland, Latvia, Lithuania, Norway, Sweden                                                                                                                                                                                        |
|        | South            | Greece, Italy, Portugal, Spain                                                                                                                                                                                                                               |
|        | West             | Austria, Belgium, France, Germany, Ireland, Luxemburg, The Netherlands, Switzerland, United Kingdom                                                                                                                                                          |



**Table S2.** The division of sequences of H5 HPAI viruses among host categories

| Reassortant |          |       | No. of sequences |                          |                         |                      |                       |               |
|-------------|----------|-------|------------------|--------------------------|-------------------------|----------------------|-----------------------|---------------|
| No.         | Name     | Group | Total            | Domestic<br>anseriformes | Domestic<br>galliformes | Wild<br>anseriformes | Wild<br>long<br>range | Wild<br>other |
| 1           | CABAD8AA | I     | 16               | 3                        | 0                       | 5                    | 0                     | 8             |
| 2           | CAEAF8AA | I     | 13               | 3                        | 4                       | 1                    | 3                     | 2             |
| 3           | AAAAA8AA | II    | 109              | 9                        | 29                      | 30                   | 27                    | 14            |
| 4           | AADAA8AA | II    | 14               | 1                        | 0                       | 4                    | 1                     | 8             |
| 5           | DCBAE5AA | III   | 15               | 0                        | 1                       | 9                    | 2                     | 3             |
| 6           | BABAB8AA | IV    | 56               | 17                       | 17                      | 14                   | 2                     | 6             |
| 7           | BDBAB8AA | IV    | 6                | 2                        | 2                       | 1                    | 1                     | 0             |

**Table S3.** Dataset (i) of gene sequences of 240 isolates (232 complete genomes, 8 partial genomes) from 25 different countries in the period May 2016 to July 2017 with subtypes H5N8 (218), H5N5 (21) and H5N6 (1) used for BEAST analysis.

| Accn_1 | Accn_2 | Accn_3 | Accn_4.H5 | Accn_5 | Accn_6.N5 | Accn_6.N8 | Accn_7 | Accn_8 | Sub-type | Country     | IsolateName                                             | Decimal Date | WG_CODE  |
|--------|--------|--------|-----------|--------|-----------|-----------|--------|--------|----------|-------------|---------------------------------------------------------|--------------|----------|
| 224580 | 224580 | 224580 | 224580    | 224580 | 0         | 224580    | 224580 | 224580 | H5N8     | Russia      | A/great_crested_grebe/Uvs-Nuur_Lake/341/2016            | 2016.395     | CABAD8AA |
| 224726 | 224726 | 224726 | 224726    | 224726 | 0         | 224726    | 224726 | 224726 | H5N8     | China       | A/Bar-headed_Goose/Qinghai/BTY11-LU/2016                | 2016.351     | CABAD8AA |
| 224740 | 224740 | 224740 | 224740    | 224740 | 0         | 224740    | 224740 | 224740 | H5N8     | China       | A/Bar-headed_Goose/Qinghai/BTY18-LU/2016                | 2016.367     | CABAD8AA |
| 224743 | 224743 | 224743 | 224743    | 224743 | 0         | 224743    | 224743 | 224743 | H5N8     | China       | A/Brown-headed_Gull/Qinghai/ZTO1-LU/2016                | 2016.329     | CABAD8AA |
| 224751 | 224751 | 224751 | 224751    | 224751 | 0         | 224751    | 224751 | 224751 | H5N8     | China       | A/Brown-headed_Gull/Qinghai/ZTO6-MU/2016                | 2016.367     | CABAD8AA |
| 224752 | 224752 | 224752 | 224752    | 224752 | 0         | 224752    | 224752 | 224752 | H5N8     | China       | A/Great_Black-headed_Gull/Qinghai/YO1-B/2016            | 2016.367     | CABAD8AA |
| 230820 | 230820 | 230820 | 230820    | 230820 | 0         | 230820    | 230820 | 230820 | H5N8     | Russia      | A/great_crested_grebe/Tyva/34/2016                      | 2016.395     | CABAD8AA |
| 231684 | 231684 | 231684 | 231684    | 231684 | 0         | 231684    | 231684 | 231684 | H5N8     | Russia      | A/wild_duck/Tyva/35/2016                                | 2016.395     | CABAD8AA |
| 231685 | 231685 | 231685 | 231685    | 231685 | 0         | 231685    | 231685 | 231685 | H5N8     | Russia      | A/black-headed_gull/Tyva/41/2016                        | 2016.395     | CABAD8AA |
| 234057 | 234057 | 234057 | 234057    | 234057 | 0         | 234057    | 234057 | 234057 | H5N8     | Russia      | A/grey_heron_/Uvs-Nuur_Lake/20/2016                     | 2016.395     | CABAD8AA |
| 234058 | 234058 | 234058 | 234058    | 234058 | 0         | 234058    | 234058 | 234058 | H5N8     | Russia      | A/common_tern_/Uvs-Nuur_Lake/26/2016                    | 2016.395     | CABAD8AA |
| 237553 | 237553 | 237553 | 237553    | 237553 | 0         | 237553    | 237553 | 237553 | H5N8     | India       | A/duck/India/10CA01/2016                                | 2016.792     | CABAA8AA |
| 237554 | 237554 | 237554 | 237554    | 237554 | 0         | 237554    | 237554 | 237554 | H5N8     | India       | A/painted_stork/India/10CA03/2016                       | 2016.8       | CAEAF8AA |
| 237730 | 237730 | 237730 | 237730    | 237730 | 0         | 237730    | 237730 | 237730 | H5N8     | Hungary     | A/mute_swan/Hungary/51049/2016                          | 2016.797     | BABAB8AA |
| 237731 | 237731 | 237731 | 237731    | 237731 | 0         | 237731    | 237731 | 237731 | H5N8     | Hungary     | A/domestic_turkey/Hungary/53433/2016                    | 2016.836     | BABAB8AA |
| 237921 | 237921 | 237921 | 237921    | 237921 | 0         | 237921    | 237921 | 237921 | H5N8     | Poland      | A/wild_duck/Poland/82A/2016                             | 2016.836     | AAAAA8AA |
| 237944 | 237944 | 237944 | 237944    | 237944 | 0         | 237944    | 237944 | 237944 | H5N8     | Germany     | A/tufted_duck/Germany/AR8444-L01987/2016                | 2016.849     | AAAAA8AA |
| 237964 | 237964 | 237964 | 237964    | 237964 | 0         | 237964    | 237964 | 237964 | H5N8     | Hungary     | A/duck/Hungary/54494/2016                               | 2016.852     | BABAB8AA |
| 237965 | 237965 | 237965 | 237965    | 237965 | 0         | 237965    | 237965 | 237965 | H5N8     | Hungary     | A/goose/Hungary/55128/2016                              | 2016.86      | BABAB8AA |
| 238037 | 238037 | 238037 | 238037    | 238037 | 0         | 238037    | 238037 | 238037 | H5N8     | Germany     | A/turkey/Germany-SH/R8595/2016                          | 2016.855     | AAAAA8AA |
| 238196 | 238196 | 238196 | 238196    | 238196 | 0         | 238196    | 238196 | 238196 | H5N8     | Croatia     | A/mute_swan/Croatia/70/2016                             | 2016.827     | BABAB8AA |
| 238896 | 238896 | 238896 | 238896    | 238896 | 0         | 238896    | 238896 | 238896 | H5N8     | Sweden      | A/Chicken/Sweden/SVA161122KU0453/SZ0209321/2016         | 2016.888     | AAAAA8AA |
| 238897 | 238897 | 238897 | 238897    | 238897 | 0         | 238897    | 238897 | 238897 | H5N8     | Sweden      | A/Common_Golden_ey/Sweden/SVA161117KU0322/SZ002165/2016 | 2016.868     | AAAAA8AA |
| 239419 | 239419 | 239419 | 239419    | 239419 | 0         | 239419    | 239419 | 239419 | H5N8     | Hungary     | A/chicken/Hungary/59048/2016                            | 2016.899     | BABAB8AA |
| 239420 | 239420 | 239420 | 239420    | 239420 | 0         | 239420    | 239420 | 239420 | H5N8     | Hungary     | A/duck/Hungary/60441/2016                               | 2016.918     | BABAB8AA |
| 239436 | 239436 | 239436 | 239436    | 239436 | 0         | 239436    | 239436 | 239436 | H5N8     | Switzerland | A/tufted_duck/Switzerland/V237-L02003/2016              | 2016.871     | AAAAA8AA |
| 239437 | 239437 | 239437 | 239437    | 239437 | 0         | 239437    | 239437 | 239437 | H5N8     | Switzerland | A/caspian_gull/Switzerland/V247-L02004/2016             | 2016.871     | AAAAA8AA |
| 239801 | 239801 | 239801 | 239801    | 239801 | 0         | 239801    | 239801 | 239801 | H5N8     | U.K.        | A/turkey/England/052131/2016                            | 2016.953     | AAAAA8AA |
| 239997 | 239997 | 239997 | 239997    | 239997 | 0         | 239997    | 239997 | 239997 | H5N8     | France      | A/decoy_duck/France                                     | 2016.901     | AAAAA8AA |

|        |        |        |        |        |        |        |        |        |      |         |                                                |          |          |
|--------|--------|--------|--------|--------|--------|--------|--------|--------|------|---------|------------------------------------------------|----------|----------|
| 240012 | 240012 | 240012 | 240012 | 240012 | 0      | 240012 | 240012 | 240012 | H5N8 | France  | ce/161104e/2016<br>A/duck/France/161108h/2016  | 2016.907 | BABAB8AA |
| 240101 | 240101 | 240101 | 240101 | 240101 | 240101 | 0      | 240101 | 240101 | H5N5 | Croatia | A/mute_swan/Croatia/102/2016                   | 2016.986 | DCBAE5AA |
| 240102 | 240102 | 240102 | 240102 | 240102 | 0      | 240102 | 240102 | 240102 | H5N8 | Poland  | A/domestic_goose/Poland/33/2016                | 2016.918 | BDBAB8AA |
| 240104 | 240104 | 240104 | 240104 | 240104 | 0      | 240104 | 240104 | 240104 | H5N8 | Poland  | A/chicken/Poland/79A/2016                      | 2016.959 | BABAB8AA |
| 240110 | 240110 | 240110 | 240110 | 240110 | 0      | 240110 | 240110 | 240110 | H5N8 | Russia  | A/chicken/Astrakhan/3131/2016                  | 2016.948 | CABAE8AA |
| 240677 | 240677 | 240677 | 240677 | 240677 | 0      | 240677 | 240677 | 240677 | H5N8 | Russia  | A/domestic_duck/Siberia/103/2016               | 2016.756 | CAEAF8AA |
| 240893 | 240893 | 240893 | 240893 | 240893 | 240893 | 0      | 240893 | 240893 | H5N5 | Germany | A/swan/Germany-SN/R10645/2016                  | 2016.948 | DCBAE5AA |
| 242902 | 242902 | 242902 | 242902 | 242902 | 0      | 242902 | 242902 | 242902 | H5N8 | Italy   | A/wigeon/Italy/17VIR57-3/2017                  | 2017.005 | AAAAA8AA |
| 243085 | 243085 | 243085 | 243085 | 243085 | 243085 | 0      | 243085 | 243085 | H5N5 | Italy   | A/wigeon/Italy/16VIR9616-3/2016                | 2016.992 | DCBAE5AA |
| 243698 | 243698 | 243698 | 243698 | 243698 | 243698 | 0      | 243698 | 243698 | H5N5 | Croatia | A/mute_swan/Croatia/42/2017                    | 2017.052 | DCBAE5AA |
| 247713 | 247713 | 247713 | 247713 | 247713 | 0      | 247713 | 247713 | 247713 | H5N8 | Denmark | A/tufted_duck/Denmark/17740-1/2016             | 2016.852 | AAAAA8AA |
| 247716 | 247716 | 247716 | 247716 | 247716 | 0      | 247716 | 247716 | 247716 | H5N8 | Russia  | A/Ural_owl/Voronezh/14/2017                    | 2017.014 | AAAAA8AA |
| 247717 | 247717 | 247717 | 247717 | 247717 | 0      | 247717 | 247717 | 247717 | H5N8 | Russia  | A/long-eared_owl/Voronezh/16/2017              | 2017.014 | AAAAA8AA |
| 247720 | 247720 | 247720 | 247720 | 247720 | 0      | 247720 | 247720 | 247720 | H5N8 | Russia  | A/chicken/Voronezh/20/2017                     | 2017.014 | AAAAA8AA |
| 247721 | 247721 | 247721 | 247721 | 247721 | 0      | 247721 | 247721 | 247721 | H5N8 | Russia  | A/turkey/Rostov/11/2017                        | 2017     | AAAAA8AA |
| 247722 | 247722 | 247722 | 247722 | 247722 | 0      | 247722 | 247722 | 247722 | H5N8 | Russia  | A/goose/Krasnodar/3144/2017                    | 2017.014 | AAAAA8AA |
| 247723 | 247723 | 247723 | 247723 | 247723 | 0      | 247723 | 247723 | 247723 | H5N8 | Russia  | A/mute_swan/Krasnodar/25/2017                  | 2017.014 | AAAAA8AA |
| 247724 | 247724 | 247724 | 247724 | 247724 | 0      | 247724 | 247724 | 247724 | H5N8 | Russia  | A/wild_duck/Tatarskaya/3059/2016               | 2016.751 | AAAAA8AA |
| 247725 | 247725 | 247725 | 247725 | 247725 | 0      | 247725 | 247725 | 247725 | H5N8 | Russia  | A/chicken/Kalmykia/2643/2016                   | 2016.888 | AAAAA8AA |
| 249682 | 249682 | 249682 | 249682 | 249682 | 0      | 249682 | 249682 | 249682 | H5N8 | Germany | A/domestic_goose/Germany-BY/R677/2017          | 2017.066 | BABAB8AA |
| 249691 | 249691 | 249691 | 249691 | 249691 | 0      | 249691 | 249691 | 249691 | H5N8 | Germany | A/chicken/Germany-MV/R10048/2016               | 2016.904 | AAAAA8AA |
| 249692 | 249692 | 249692 | 249692 | 249692 | 0      | 249692 | 249692 | 249692 | H5N8 | Germany | A/chicken/Germany-NI/R11406/2016               | 2016.978 | AAAAA8AA |
| 250231 | 250231 | 250231 | 250231 | 250231 | 0      | 250231 | 250231 | 250231 | H5N8 | Russia  | A/domestic_duck/Siberia/49_feather             | 2016.69  | CAEAF8AA |
| 250885 | 250885 | 250885 | 250885 | 250885 | 0      | 250885 | 250885 | 250885 | H5N8 | Czechia | A/mute_swan/Czech Republic/54-17_2/2017_-H5N8- | 2017.003 | BABAB8AA |
| 250887 | 250887 | 250887 | 250887 | 250887 | 0      | 250887 | 250887 | 250887 | H5N8 | Czechia | A/chicken/Czech Republic/55-17_1/2017_-H5N8-   | 2017.003 | BABAB8AA |
| 253036 | 253036 | 253036 | 253036 | 253036 | 0      | 253036 | 253036 | 253036 | H5N8 | U.K.    | A/turkey/England/003778/2017                   | 2017.038 | AAAAA8AA |
| 253037 | 253037 | 253037 | 253037 | 253037 | 0      | 253037 | 253037 | 253037 | H5N8 | U.K.    | A/chicken/Wales/00023/2016                     | 2016.997 | AAAAA8AA |
| 253038 | 253038 | 253038 | 253038 | 253038 | 0      | 253038 | 253038 | 253038 | H5N8 | U.K.    | A/pochar_duck/England/SA12_157809/2016         | 2016.964 | AAAAA8AA |
| 254745 | 254745 | 254745 | 254745 | 254745 | 0      | 254745 | 254745 | 254745 | H5N8 | Korea   | A/mallard_duck/Korea/WA137/2017                | 2017.063 | CAEAF8AA |
| 254814 | 254814 | 254814 | 254814 | 254814 | 0      | 254814 | 254814 | 254814 | H5N8 | Hungary | A/mallard/Hungary/57857/2016                   | 2016.888 | BABAB8AA |
| 255181 | 255181 | 255181 | 255181 | 255181 | 0      | 255181 | 255181 | 255181 | H5N8 | Italy   | A/swan/Italy/17VIR537-2/2017                   | 2017.049 | AAAAA8AA |
| 255182 | 255182 | 255182 | 255182 | 255182 | 0      | 255182 | 255182 | 255182 | H5N8 | Italy   | A/turkey/Italy/17VIR538-1/2017                 | 2017.052 | CAEAF8AA |
| 255183 | 255183 | 255183 | 255183 | 255183 | 0      | 255183 | 255183 | 255183 | H5N8 | Italy   | A/turkey/Italy/17VIR576-11/2017                | 2017.06  | AAAAA8AA |
| 255184 | 255184 | 255184 | 255184 | 255184 | 0      | 255184 | 255184 | 255184 | H5N8 | Italy   | A/chicken/Italy/17VIR653-12/2017               | 2017.066 | AAAAA8AA |
| 255186 | 255186 | 255186 | 255186 | 255186 | 0      | 255186 | 255186 | 255186 | H5N8 | Italy   | A/turkey/Italy/17VIR1338-3/2017                | 2017.121 | BABAB8AA |
| 255189 | 255189 | 255189 | 255189 | 255189 | 255189 | 0      | 255189 | 255189 | H5N5 | Italy   | A/gadwall/Italy/17VIR133-2/2017                | 2017.025 | DCBAE5AA |
| 255190 | 255190 | 255190 | 255190 | 255190 | 0      | 255190 | 255190 | 255190 | H5N8 | Hungary | A/Mute_swan/Hungary/119/2017                   | 2017.003 | BABAB8AA |
| 255191 | 255191 | 255191 | 255191 | 255191 | 0      | 255191 | 255191 | 255191 | H5N8 | Hungary | A/Harris_Hawk/Hungary/120/2017                 | 2017.003 | BABAB8AA |
| 255193 | 255193 | 255193 | 255193 | 255193 | 0      | 255193 | 255193 | 255193 | H5N8 | Hungary | A/Duck/Hungary/984/2017                        | 2017.027 | BABAB8AA |
| 255194 | 255194 | 255194 | 255194 | 255194 | 0      | 255194 | 255194 | 255194 | H5N8 | Hungary | A/Goose/Hungary/1030/2017                      | 2017.027 | AAAAA8AA |
| 255196 | 255196 | 255196 | 255196 | 255196 | 0      | 255196 | 255196 | 255196 | H5N8 | Hungary | A/Grey_lag_goose/Hungary/1941/2017             | 2017.047 | BABAB8AA |

|        |        |        |        |        |        |        |        |        |      |             |                                                 |          |          |
|--------|--------|--------|--------|--------|--------|--------|--------|--------|------|-------------|-------------------------------------------------|----------|----------|
| 255197 | 255197 | 255197 | 255197 | 255197 | 0      | 255197 | 255197 | 255197 | H5N8 | Hungary     | A/Mute_swan/Hungary/1955/2017                   | 2017.047 | BABAB8AA |
| 255198 | 255198 | 255198 | 255198 | 255198 | 0      | 255198 | 255198 | 255198 | H5N8 | Hungary     | A/Turkey/Hungary/2030/2017                      | 2017.047 | BABAB8AA |
| 255200 | 255200 | 255200 | 255200 | 255200 | 0      | 255200 | 255200 | 255200 | H5N8 | Hungary     | A/Mute_swan/Hungary/2508/2017                   | 2017.058 | BABAB8AA |
| 255205 | 255205 | 255205 | 255205 | 255205 | 0      | 255205 | 255205 | 255205 | H5N8 | Hungary     | A/Chicken/Hungary/2496/2017                     | 2017.063 | BABAB8AA |
| 255206 | 255206 | 255206 | 255206 | 255206 | 0      | 255206 | 255206 | 255206 | H5N8 | Hungary     | A/Peregrine_falcon/Hungary/4882/2017            | 2017.101 | AAAAA8AA |
| 255207 | 255207 | 255207 | 255207 | 255207 | 0      | 255207 | 255207 | 255207 | H5N8 | Hungary     | A/Mute_swan/Hungary/5316/2017                   | 2017.107 | BABAB8AA |
| 255208 | 255208 | 255208 | 255208 | 255208 | 0      | 255208 | 255208 | 255208 | H5N8 | Hungary     | A/Common_buzzard/Hungary/7061/2017              | 2017.14  | BABAB8AA |
| 255209 | 255209 | 255209 | 255209 | 255209 | 0      | 255209 | 255209 | 255209 | H5N8 | Hungary     | A/Common_tern/Hungary/8187/2017                 | 2017.159 | AAAAA8AA |
| 255211 | 255211 | 255211 | 255211 | 255211 | 0      | 255211 | 255211 | 255211 | H5N8 | Hungary     | A/Harris_hawk/Hungary/2762b/2017                | 2017.063 | BABAB8AA |
| 255212 | 255212 | 255212 | 255212 | 255212 | 0      | 255212 | 255212 | 255212 | H5N8 | Hungary     | A/Grey_lag_goose/Hungary/320/2017               | 2017.008 | AAAAA8AA |
| 255213 | 255213 | 255213 | 255213 | 255213 | 0      | 255213 | 255213 | 255213 | H5N8 | Hungary     | A/GuineaFowl/Hungary/596/2017                   | 2017.014 | BABAB8AA |
| 255214 | 255214 | 255214 | 255214 | 255214 | 0      | 255214 | 255214 | 255214 | H5N8 | Hungary     | A/Chicken/Hungary/1751/2017                     | 2017.044 | BABAB8AA |
| 255216 | 255216 | 255216 | 255216 | 255216 | 0      | 255216 | 255216 | 255216 | H5N8 | Hungary     | A/Mallard/Hungary/5821/2017                     | 2017.118 | BABAB8AA |
| 255219 | 255219 | 255219 | 255219 | 255219 | 0      | 255219 | 255219 | 255219 | H5N8 | Hungary     | A/White_froned_goose/Hungary/801/2017           | 2017.022 | BABAB8AA |
| 255220 | 255220 | 255220 | 255220 | 255220 | 0      | 255220 | 255220 | 255220 | H5N8 | Hungary     | A/Mallard/Hungary/1574a/2017                    | 2017.036 | AAAAA8AA |
| 255398 | 255398 | 255398 | 255398 | 255398 | 0      | 255398 | 255398 | 255398 | H5N8 | Hungary     | A/Goose/Hungary/59712/2016                      | 2016.901 | BABAB8AA |
| 255400 | 255400 | 255400 | 255400 | 255400 | 0      | 255400 | 255400 | 255400 | H5N8 | Netherlands | A/eurasian_wigeon/Netherlands/16015273-002/2016 | 2016.915 | AAAAA8AA |
| 255405 | 255405 | 255405 | 255405 | 255405 | 0      | 255405 | 255405 | 255405 | H5N8 | Netherlands | A/tufted_duck/Netherlands/16013976-001/2016     | 2016.855 | AAAAA8AA |
| 255409 | 255409 | 255409 | 255409 | 255409 | 0      | 255409 | 255409 | 255409 | H5N8 | Netherlands | A/duck/Netherlands/16014829-011-015/2016        | 2016.899 | AAAAA8AA |
| 255411 | 255411 | 255411 | 255411 | 255411 | 0      | 255411 | 255411 | 255411 | H5N8 | Netherlands | A/chicken/Netherlands/16016112-001-005          | 2016.945 | AAAAA8AA |
| 255626 | 255626 | 255626 | 255626 | 255626 | 0      | 255626 | 255626 | 255626 | H5N8 | France      | A/eurasianwigeon/France/161323/2016             | 2016.97  | AAAAA8AA |
| 255627 | 255627 | 255627 | 255627 | 255627 | 0      | 255627 | 255627 | 255627 | H5N8 | France      | A/duck/France/161587/2016                       | 2016.995 | BABAB8AA |
| 255628 | 255628 | 255628 | 255628 | 255628 | 0      | 255628 | 255628 | 255628 | H5N8 | France      | A/chicken/France/161585/2016                    | 2016.995 | AAAAA8AA |
| 255629 | 255629 | 255629 | 255629 | 255629 | 0      | 255629 | 255629 | 255629 | H5N8 | France      | A/duck/France/170437b/2016                      | 2017.044 | BABAB8AA |
| 255891 | 255891 | 255891 | 255891 | 255891 | 0      | 255891 | 255891 | 255891 | H5N8 | Netherlands | A/Tufted_Duck/Netherlands/1/2016                | 2016.899 | AAAAA8AA |
| 255892 | 255892 | 255892 | 255892 | 255892 | 0      | 255892 | 255892 | 255892 | H5N8 | Netherlands | A/Great_Black-backed_Gull/Netherlands/2/2016    | 2016.893 | AAAAA8AA |
| 255910 | 255910 | 255910 | 255910 | 255910 | 0      | 255910 | 255910 | 255910 | H5N8 | Netherlands | A/Mew_Gull/Netherlands/1/2016                   | 2016.893 | AAAAA8AA |
| 255913 | 255913 | 255913 | 255913 | 255913 | 0      | 255913 | 255913 | 255913 | H5N8 | Netherlands | A/Mallard/Netherlands/2/2017                    | 2017.016 | AAAAA8AA |
| 255914 | 255914 | 255914 | 255914 | 255914 | 0      | 255914 | 255914 | 255914 | H5N8 | Netherlands | A/Eurasian_Wigeon/Netherlands/9/2016            | 2016.923 | AAAAA8AA |
| 255917 | 255917 | 255917 | 255917 | 255917 | 255917 | 0      | 0      | 255917 | H5N5 | Poland      | A/mute_swan/Poland/64/2017                      | 2017.082 | DCBAE5AA |
| 255933 | 255933 | 255933 | 255933 | 255933 | 0      | 255933 | 255933 | 255933 | H5N8 | Hungary     | A/Cormorant/Hungary/6102/2017                   | 2017.123 | BABAB8AA |
| 255936 | 255936 | 255936 | 255936 | 255936 | 0      | 255936 | 255936 | 255936 | H5N8 | Hungary     | A/Pheasant/Hungary/6553/2017                    | 2017.126 | BABAB8AA |
| 255937 | 255937 | 255937 | 255937 | 255937 | 0      | 255937 | 255937 | 255937 | H5N8 | Hungary     | A/Pheasant/Hungary/7685/2017                    | 2017.148 | BABAB8AA |
| 255938 | 255938 | 255938 | 255938 | 255938 | 0      | 255938 | 255938 | 255938 | H5N8 | Hungary     | A/Rook/Hungary/4975/2017                        | 2017.104 | BABAB8AA |
| 256298 | 256298 | 256298 | 256298 | 256298 | 0      | 256298 | 256298 | 256298 | H5N8 | Russia      | A/gadwall/Kurgan/2442/2016                      | 2016.652 | AAAAA8AA |
| 256300 | 256300 | 256300 | 256300 | 256300 | 0      | 256300 | 256300 | 256300 | H5N8 | Russia      | A/chicken/Sergiyev_Posad/39/2017                | 2017.164 | AAAAA8AA |
| 256301 | 256301 | 256301 | 256301 | 256301 | 256301 | 0      | 256301 | 256301 | H5N5 | Russia      | A/environment/Kamchatka/18/2016                 | 2016.748 | DCBAE5AA |
| 256305 | 256305 | 256305 | 256305 | 256305 | 0      | 256305 | 256305 | 256305 | H5N8 | Italy       | A/shelduck/Italy/17VIR1572-24/2017              | 2017.005 | BABAB8AA |
| 256306 | 256306 | 256306 | 256306 | 256306 | 0      | 256306 | 256306 | 256306 | H5N8 | Italy       | A/turkey/Italy/17VIR1574-1/2017                 | 2017.14  | BABAB8AA |
| 256308 | 256308 | 256308 | 256308 | 256308 | 0      | 256308 | 256308 | 256308 | H5N8 | Italy       | A/chicken/Italy/17                              | 2017.156 | BABAB8AA |

|        |        |        |        |        |        |        |        |        |      |             |                                                           |          |          |
|--------|--------|--------|--------|--------|--------|--------|--------|--------|------|-------------|-----------------------------------------------------------|----------|----------|
| 256453 | 256453 | 256453 | 256453 | 256453 | 0      | 256453 | 256453 | 256453 | H5N8 | Hungary     | VIR1751-3/2017<br>A/Duck/Hungary/54738/2016               | 2016.855 | BABAB8AA |
| 256460 | 256460 | 256460 | 256460 | 256460 | 0      | 256460 | 256460 | 256460 | H5N8 | Hungary     | A/Turkey/Hungary/53136/2016                               | 2016.833 | BABAB8AA |
| 256462 | 256462 | 256462 | 256462 | 256462 | 256462 | 0      | 256462 | 256462 | H5N5 | Hungary     | A/Mute_swan/Hungary/5879/2017                             | 2017.121 | DCBAE5AA |
| 256818 | 256818 | 256818 | 256818 | 256818 | 0      | 256818 | 256818 | 256818 | H5N8 | Germany     | A/domestic_duck/Germany-MV/R9764/2016                     | 2016.888 | AAAAA8AA |
| 257411 | 257411 | 257411 | 257411 | 257411 | 257411 | 0      | 257411 | 257411 | H5N5 | Georgia     | A/mallard/Republic_of_Georgia/1/2016                      | 2016.945 | DCBAE5AA |
| 257423 | 257423 | 257423 | 257423 | 257423 | 0      | 257423 | 257423 | 257423 | H5N8 | Georgia     | A/mallard/Republic_of_Georgia/2/2016                      | 2016.937 | AAAAA8AA |
| 257699 | 257699 | 257699 | 257699 | 257699 | 0      | 257699 | 257699 | 257699 | H5N8 | Switzerland | A/Tufted_Duck/Switzerland/V237/2016                       | 2016.866 | AAAAA8AA |
| 259074 | 259074 | 259074 | 259074 | 259074 | 259074 | 0      | 259074 | 259074 | H5N5 | Germany     | A/common_buzzard/Germany-SN/R1117/2017                    | 2017.099 | DCBAE5AA |
| 259525 | 259525 | 259525 | 259525 | 259525 | 0      | 0      | 259525 | 259525 | H5N5 | Germany     | A/egret/Germany-SH/R1459/2017                             | 2017.121 | DEBAG5AA |
| 260058 | 260058 | 260058 | 260058 | 260058 | 260058 | 0      | 260058 | 260058 | H5N5 | Germany     | A/grey_heron/Germany-SN/R572/2017                         | 2017.058 | DCBAE5AA |
| 260059 | 260059 | 260059 | 260059 | 260059 | 260059 | 0      | 260059 | 260059 | H5N5 | Germany     | A/cormorant/Germany-SH/R896/2017                          | 2017.079 | DEBAG5AA |
| 261332 | 261332 | 261332 | 261332 | 261332 | 261332 | 0      | 261332 | 261332 | H5N5 | Croatia     | A/chicken/Croatia/104/2017                                | 2017.178 | DCBAE5AA |
| 261634 | 261634 | 261634 | 261634 | 261634 | 0      | 261634 | 261634 | 261634 | H5N8 | Macedonia   | A/chicken/Republic_of_Macedonia/AR1167-L02131/2017        | 2017.038 | BABAB8AA |
| 261687 | 261687 | 261687 | 261687 | 261687 | 0      | 261687 | 261687 | 261687 | H5N8 | Germany     | A/black_swan/Germany-BW/R1364/2017                        | 2017.115 | BABAB8AA |
| 261946 | 261946 | 261946 | 261946 | 261946 | 0      | 261946 | 261946 | 261946 | H5N8 | Israel      | A/chicken/Israel/AR1794-L02146/2016                       | 2016.855 | CABAE8AA |
| 262055 | 262055 | 262055 | 262055 | 262055 | 0      | 262055 | 262055 | 262055 | H5N8 | Germany     | A/eurasian_wigeon/Germany-NI/AR249-L02143/2017_01/04/2017 | 2017.008 | AAAAA8AA |
| 262056 | 262056 | 262056 | 262056 | 262056 | 262056 | 0      | 262056 | 262056 | H5N5 | Germany     | A/greylag_goose/Germany-NIAR11353-L02142/2016             | 2016.986 | DCBAE5AA |
| 262057 | 262057 | 262057 | 262057 | 262057 | 0      | 262057 | 262057 | 262057 | H5N8 | Germany     | A/mute_swan/Germany-NI/AR1529-L02145/2017                 | 2017.121 | AAAAA8AA |
| 262059 | 262059 | 262059 | 262059 | 262059 | 0      | 262059 | 262059 | 262059 | H5N8 | Germany     | A/greylag_goose/Germany-NI/AR703-L02138/2017              | 2017.066 | BDBAB8AA |
| 266420 | 266420 | 266420 | 266420 | 266420 | 0      | 266420 | 266420 | 266420 | H5N8 | Korea       | A/common_teal/Korea/W550/2016                             | 2016.953 | CAEAF8AA |
| 266421 | 266421 | 266421 | 266421 | 266421 | 0      | 266421 | 266421 | 266421 | H5N8 | Korea       | A/common_teal/Korea/W555/2017                             | 2017.008 | CAEAF8AA |
| 266536 | 266536 | 266536 | 266536 | 266536 | 0      | 266536 | 266536 | 266536 | H5N8 | Belgium     | A/chicken/Belgium/807/2017                                | 2017.085 | AAAAA8AA |
| 266537 | 266537 | 266537 | 266537 | 266537 | 0      | 266537 | 266537 | 266537 | H5N8 | Belgium     | A/peacock/Belgium/1017/2017                               | 2017.104 | AAAAA8AA |
| 266538 | 266538 | 266538 | 266538 | 266538 | 0      | 266538 | 266538 | 266538 | H5N8 | Belgium     | A/Cygnus_olor/Belgium/1567/2017                           | 2017.14  | BABAB8AA |
| 267136 | 267136 | 267136 | 267136 | 267136 | 0      | 267136 | 267136 | 267136 | H5N8 | Egypt       | A/green-winged_teal/Egypt/877/2016                        | 2016.934 | CAEAF8AA |
| 268618 | 268618 | 268618 | 268618 | 268618 | 0      | 268618 | 268618 | 268618 | H5N8 | Netherlands | A/Bk_swan/NL-Den_Oever/16013973-002/2016                  | 2016.858 | AAAAA8AA |
| 268619 | 268619 | 268619 | 268619 | 268619 | 0      | 268619 | 268619 | 268619 | H5N8 | Netherlands | A/Bl_H_gull/NL-Slootdorp/16014102-002/2016                | 2016.86  | AAAAA8AA |
| 268620 | 268620 | 268620 | 268620 | 268620 | 0      | 268620 | 268620 | 268620 | H5N8 | Netherlands | A/Buzzard/NL-Durgedam/16015100-004/2016                   | 2016.912 | AADA8AA  |
| 268621 | 268621 | 268621 | 268621 | 268621 | 0      | 268621 | 268621 | 268621 | H5N8 | Netherlands | A/C_Gull/NL-Slootdorp/16014102-003/2016                   | 2016.86  | AAAAA8AA |
| 268622 | 268622 | 268622 | 268622 | 268622 | 0      | 268622 | 268622 | 268622 | H5N8 | Netherlands | A/Ch/NL-Abbeba/X16015736/2016                             | 2016.945 | AAAAA8AA |
| 268623 | 268623 | 268623 | 268623 | 268623 | 0      | 268623 | 268623 | 268623 | H5N8 | Netherlands | A/Ch/NL-Boven_Leeuwen/16016151-006-010/2016               | 2016.964 | AAAAA8AA |
| 268624 | 268624 | 268624 | 268624 | 268624 | 0      | 268624 | 268624 | 268624 | H5N8 | Netherlands | A/Ch/NL-Den_Oever/16014231-001/2016                       | 2016.871 | AAAAA8AA |
| 268625 | 268625 | 268625 | 268625 | 268625 | 0      | 268625 | 268625 | 268625 | H5N8 | Netherlands | A/Ch/NL-Hiaure/16016112-001-005/2016                      | 2016.959 | AAAAA8AA |

|        |        |        |        |        |   |        |        |        |      |             |                                                    |          |          |
|--------|--------|--------|--------|--------|---|--------|--------|--------|------|-------------|----------------------------------------------------|----------|----------|
| 268626 | 268626 | 268626 | 268626 | 268626 | 0 | 268626 | 268626 | 268626 | H5N8 | Netherlands | A/Ch/NL-Rhenen/16016141-006/2016                   | 2016.959 | AAAAA8AA |
| 268627 | 268627 | 268627 | 268627 | 268627 | 0 | 268627 | 268627 | 268627 | H5N8 | Netherlands | A/Ch/NL-Zoeterwoude/16016484-021-025/2016          | 2016.978 | AAAAA8AA |
| 268628 | 268628 | 268628 | 268628 | 268628 | 0 | 268628 | 268628 | 268628 | H5N8 | Netherlands | A/Crow/NL-Oostwoud/16015372-004/2016               | 2016.926 | AADA8AA  |
| 268629 | 268629 | 268629 | 268629 | 268629 | 0 | 268629 | 268629 | 268629 | H5N8 | Netherlands | A/Dk/NL-Biddinghuizen/16014829-011-015/2016        | 2016.899 | AAAAA8AA |
| 268630 | 268630 | 268630 | 268630 | 268630 | 0 | 268630 | 268630 | 268630 | H5N8 | Netherlands | A/Dk/NL-Biddinghuizen/16015083-016-020/2016        | 2016.912 | AAAAA8AA |
| 268632 | 268632 | 268632 | 268632 | 268632 | 0 | 268632 | 268632 | 268632 | H5N8 | Netherlands | A/Dk/NL-Kamperveen/16016104-001-005/2016           | 2016.953 | AAAAA8AA |
| 268633 | 268633 | 268633 | 268633 | 268633 | 0 | 268633 | 268633 | 268633 | H5N8 | Netherlands | A/Dk/NL-Rotterdam/16014008-001-005/2016            | 2016.858 | AAAAA8AA |
| 268634 | 268634 | 268634 | 268634 | 268634 | 0 | 268634 | 268634 | 268634 | H5N8 | Netherlands | A/Dk/NL-Stolwijk/16016291-016-020/2016             | 2016.97  | AAAAA8AA |
| 268635 | 268635 | 268635 | 268635 | 268635 | 0 | 268635 | 268635 | 268635 | H5N8 | Netherlands | A/Eur_Wig/NL-Akkrum/16015817-003/2016              | 2016.948 | AAAAA8AA |
| 268637 | 268637 | 268637 | 268637 | 268637 | 0 | 268637 | 268637 | 268637 | H5N8 | Netherlands | A/Eur_Wig/NL-De_Waal_Texel-/16014891-004/2016      | 2016.904 | AAAAA8AA |
| 268638 | 268638 | 268638 | 268638 | 268638 | 0 | 268638 | 268638 | 268638 | H5N8 | Netherlands | A/Eur_Wig/NL-Drieborg_Dollard-/16015513-001/2016   | 2016.929 | AAAAA8AA |
| 268639 | 268639 | 268639 | 268639 | 268639 | 0 | 268639 | 268639 | 268639 | H5N8 | Netherlands | A/Eur_Wig/NL-Ennematil-Groningen/16015704-001/2016 | 2016.942 | AAAAA8AA |
| 268640 | 268640 | 268640 | 268640 | 268640 | 0 | 268640 | 268640 | 268640 | H5N8 | Netherlands | A/Eur_Wig/NL-Ferwert/16015273-002/2016             | 2016.915 | AAAAA8AA |
| 268641 | 268641 | 268641 | 268641 | 268641 | 0 | 268641 | 268641 | 268641 | H5N8 | Netherlands | A/Eur_Wig/NL-Gouda/16015824-001/2016               | 2016.948 | AAAAA8AA |
| 268642 | 268642 | 268642 | 268642 | 268642 | 0 | 268642 | 268642 | 268642 | H5N8 | Netherlands | A/Eur_Wig/NL-Greonterp/16015653-001/2016           | 2016.934 | AAAAA8AA |
| 268643 | 268643 | 268643 | 268643 | 268643 | 0 | 268643 | 268643 | 268643 | H5N8 | Netherlands | A/Eur_Wig/NL-Groningen/16015376-003/2016           | 2016.926 | AADA8AA  |
| 268644 | 268644 | 268644 | 268644 | 268644 | 0 | 268644 | 268644 | 268644 | H5N8 | Netherlands | A/Eur_Wig/NL-Leeuwarden/16015699-002/2016          | 2016.94  | AAAAA8AA |
| 268645 | 268645 | 268645 | 268645 | 268645 | 0 | 268645 | 268645 | 268645 | H5N8 | Netherlands | A/Eur_Wig/NL-Leidschendam/16015697-007/2016        | 2016.94  | AAAAA8AA |
| 268646 | 268646 | 268646 | 268646 | 268646 | 0 | 268646 | 268646 | 268646 | H5N8 | Netherlands | A/Eur_Wig/NL-Reeuwijk/16015903-003/2016            | 2016.948 | AAAAA8AA |
| 268647 | 268647 | 268647 | 268647 | 268647 | 0 | 268647 | 268647 | 268647 | H5N8 | Netherlands | A/Eur_Wig/NL-Terschelling/16015692-010/2016        | 2016.937 | AAAAA8AA |
| 268648 | 268648 | 268648 | 268648 | 268648 | 0 | 268648 | 268648 | 268648 | H5N8 | Netherlands | A/Eur_Wig/NL-Vianen/16015917-006/2016              | 2016.948 | AAAAA8AA |
| 268649 | 268649 | 268649 | 268649 | 268649 | 0 | 268649 | 268649 | 268649 | H5N8 | Netherlands | A/Eur_Wig/NL-Walterswald/16015923-003/2016         | 2016.951 | AAAAA8AA |
| 268650 | 268650 | 268650 | 268650 | 268650 | 0 | 268650 | 268650 | 268650 | H5N8 | Netherlands | A/Eur_Wig/NL-West_Graftdijk/16015746-003/2016      | 2016.945 | AAAAA8AA |
| 268651 | 268651 | 268651 | 268651 | 268651 | 0 | 268651 | 268651 | 268651 | H5N8 | Netherlands | A/Eur_Wig/NL-Wormer/16016143-002/2016              | 2016.962 | AAAAA8AA |
| 268652 | 268652 | 268652 | 268652 | 268652 | 0 | 268652 | 268652 | 268652 | H5N8 | Netherlands | A/Eur_Wig/NL-Zoeterwoude/16015702-010/2016         | 2016.94  | AAAAA8AA |
| 268653 | 268653 | 268653 | 268653 | 268653 | 0 | 268653 | 268653 | 268653 | H5N8 | Netherlands | A/Eur_Wig/NL-Zwolle/16015820-002/2016              | 2016.948 | AAAAA8AA |
| 268654 | 268654 | 268654 | 268654 | 268654 | 0 | 268654 | 268654 | 268654 | H5N8 | Netherlands | A/G_c_grebe/NL-Monnickendam/16013865-009-010/2016  | 2016.852 | AADA8AA  |
| 268655 | 268655 | 268655 | 268655 | 268655 | 0 | 268655 | 268655 | 268655 | H5N8 | Netherlands | A/Go/NL-Roggebotsluis/1601                         | 2016.877 | AADA8AA  |

|        |        |        |        |        |   |        |        |        |      |             |                                                          |          |          |
|--------|--------|--------|--------|--------|---|--------|--------|--------|------|-------------|----------------------------------------------------------|----------|----------|
| 268656 | 268656 | 268656 | 268656 | 268656 | 0 | 268656 | 268656 | 268656 | H5N8 | Netherlands | A/Gr_bk_bd_gull/NL - Slootdorp/1601410 2-005/2016        | 2016.86  | AAAAA8AA |
| 268657 | 268657 | 268657 | 268657 | 268657 | 0 | 268657 | 268657 | 268657 | H5N8 | Netherlands | A/Grey_Go/NL-Groot-Ammers/16015901 -012/2016             | 2016.951 | AAAAA8AA |
| 268658 | 268658 | 268658 | 268658 | 268658 | 0 | 268658 | 268658 | 268658 | H5N8 | Netherlands | A/Gull/NL-Marker_Wadden/16 014466-020/2016               | 2016.877 | AAAAA8AA |
| 268659 | 268659 | 268659 | 268659 | 268659 | 0 | 268659 | 268659 | 268659 | H5N8 | Netherlands | A/Gull1/NL-Marker_Wadden/16 014466-011/2016              | 2016.877 | AAAAA8AA |
| 268660 | 268660 | 268660 | 268660 | 268660 | 0 | 268660 | 268660 | 268660 | H5N8 | Netherlands | A/Gull10/NL-Marker_Wadden/16 014466-014/2016             | 2016.877 | AAAAA8AA |
| 268661 | 268661 | 268661 | 268661 | 268661 | 0 | 268661 | 268661 | 268661 | H5N8 | Netherlands | A/L-bl-ba-gull/NL-Sovon/16014324-014/2016                | 2016.874 | AAAAA8AA |
| 268662 | 268662 | 268662 | 268662 | 268662 | 0 | 268662 | 268662 | 268662 | H5N8 | Netherlands | A/M_Swan/NL-Roggebotsluis/1601 4462-019/2016             | 2016.877 | AAAAA8AA |
| 268663 | 268663 | 268663 | 268663 | 268663 | 0 | 268663 | 268663 | 268663 | H5N8 | Netherlands | A/Magpie/NL-Volendam/1601433 1-002/2016                  | 2016.874 | AAAAA8AA |
| 268664 | 268664 | 268664 | 268664 | 268664 | 0 | 268664 | 268664 | 268664 | H5N8 | Netherlands | A/Mal/NL-Ijsselmuider/16015 448-002/2016                 | 2016.929 | AAAAA8AA |
| 268665 | 268665 | 268665 | 268665 | 268665 | 0 | 268665 | 268665 | 268665 | H5N8 | Netherlands | A/Mal/NL-Mastenbroek/1601 5378-002/2016                  | 2016.926 | AAAAA8AA |
| 268666 | 268666 | 268666 | 268666 | 268666 | 0 | 268666 | 268666 | 268666 | H5N8 | Netherlands | A/P_falcon/NL-Vrouwenpolder_- Zeeland-/16015510-001/2016 | 2016.932 | AAAAA8AA |
| 268667 | 268667 | 268667 | 268667 | 268667 | 0 | 268667 | 268667 | 268667 | H5N8 | Netherlands | A/Sea_eagle/NL-Assen/16015398-002/2016                   | 2016.926 | AAAAA8AA |
| 268668 | 268668 | 268668 | 268668 | 268668 | 0 | 268668 | 268668 | 268668 | H5N8 | Netherlands | A/T_Dk/NL-Almeerder_Zand/16 014341-003/2016              | 2016.874 | AAAAA8AA |
| 268669 | 268669 | 268669 | 268669 | 268669 | 0 | 268669 | 268669 | 268669 | H5N8 | Netherlands | A/T_Dk/NL-Monnickendam/160 13865-006-008/2016            | 2016.852 | AAAAA8AA |
| 268670 | 268670 | 268670 | 268670 | 268670 | 0 | 268670 | 268670 | 268670 | H5N8 | Netherlands | A/T_Dk/NL-Roggebotsluis/1601 4462-015/2016               | 2016.877 | AAAAA8AA |
| 268671 | 268671 | 268671 | 268671 | 268671 | 0 | 268671 | 268671 | 268671 | H5N8 | Netherlands | A/T_Dk/NL-Rotterdam/160141 55-001/2016                   | 2016.868 | AAAAA8AA |
| 268673 | 268673 | 268673 | 268673 | 268673 | 0 | 268673 | 268673 | 268673 | H5N8 | Netherlands | A/T_Dk/NL-Werkendam/16014 159-003/2016                   | 2016.868 | AAAAA8AA |
| 268679 | 268679 | 268679 | 268679 | 268679 | 0 | 268679 | 268679 | 268679 | H5N8 | Netherlands | A/T_Dk/NL-Zeevolde/1601397 6-006/2016                    | 2016.855 | AAAAA8AA |
| 268681 | 268681 | 268681 | 268681 | 268681 | 0 | 268681 | 268681 | 268681 | H5N8 | Netherlands | A/T_Dk/NL-Zuidoost_Beemster/ 16014148-009/2016           | 2016.868 | AAAAA8AA |
| 268682 | 268682 | 268682 | 268682 | 268682 | 0 | 268682 | 268682 | 268682 | H5N8 | Netherlands | A/Teal/NL-Ferwert/16015273-013/2016                      | 2016.915 | AAAAA8AA |
| 268947 | 268947 | 268947 | 268947 | 268947 | 0 | 268947 | 268947 | 268947 | H5N8 | Czechia     | A/mallard/Czech_R epublic/1219- 17_1/2017_-H5N8-         | 2017.066 | BABAB8AA |
| 271705 | 271705 | 271705 | 271705 | 271705 | 0 | 271705 | 271705 | 271705 | H5N8 | Hungary     | A/Goose/Hungary/ 15729/2017                              | 2017.263 | BABAB8AA |
| 271706 | 271706 | 271706 | 271706 | 271706 | 0 | 271706 | 271706 | 271706 | H5N8 | Hungary     | A/Goose/Hungary/ 17051/2017                              | 2017.293 | BABAB8AA |
| 271709 | 271709 | 271709 | 271709 | 271709 | 0 | 271709 | 271709 | 271709 | H5N8 | Hungary     | A/Goose/Hungary/ 59763/2016                              | 2016.904 | BABAB8AA |
| 271710 | 271710 | 271710 | 271710 | 271710 | 0 | 271710 | 271710 | 271710 | H5N8 | Hungary     | A/Mulard_duck/Hu ngary/60369/2016                        | 2016.91  | BABAB8AA |
| 271713 | 271713 | 271713 | 271713 | 271713 | 0 | 271713 | 271713 | 271713 | H5N8 | Hungary     | A/Goose/Hungary/ 64909/2016                              | 2016.951 | BABAB8AA |
| 271714 | 271714 | 271714 | 271714 | 271714 | 0 | 271714 | 271714 | 271714 | H5N8 | Hungary     | A/Mulard_duck/Hu ngary/59163/2016                        | 2016.896 | BABAB8AA |
| 272859 | 272859 | 272859 | 272859 | 272859 | 0 | 272859 | 272859 | 272859 | H5N8 | Korea       | A/grey_heron/W77 9/2017                                  | 2017.071 | CAEAF8AA |
| 273846 | 273846 | 273846 | 273846 | 273846 | 0 | 273846 | 273846 | 273846 | H5N8 | Italy       | A/chicken/Italy/17 VIR3078/2017                          | 2017.263 | AAAAA8AA |
| 273847 | 273847 | 273847 | 273847 | 273847 | 0 | 273847 | 273847 | 273847 | H5N8 | Italy       | A/turkey/Italy/17V IR5878-3/2017                         | 2017.556 | AAAAA8AA |
| 274385 | 274385 | 274385 | 274385 | 274385 | 0 | 274385 | 274385 | 274385 | H5N8 | U.K.        | A/black_headed_gul                                       | 2016.964 | AAAAA8AA |

|        |        |        |        |        |        |        |        |        |      |             |                                                         |          |           |
|--------|--------|--------|--------|--------|--------|--------|--------|--------|------|-------------|---------------------------------------------------------|----------|-----------|
|        |        |        |        |        |        |        |        |        |      |             | l/England/SA12_157807/2016                              |          |           |
| 274386 | 274386 | 274386 | 274386 | 274386 | 0      | 274386 | 274386 | 274386 | H5N8 | U.K.        | A/mute_swan/England/SA21_161831/2017                    | 2017.164 | CCBAD8AA  |
| 274387 | 274387 | 274387 | 274387 | 274387 | 0      | 274387 | 274387 | 274387 | H5N8 | U.K.        | A/teal/Wales/SA26_312553/2016                           | 2016.989 | AAAAA8AA  |
| 274389 | 274389 | 274389 | 274389 | 274389 | 0      | 274389 | 274389 | 274389 | H5N8 | U.K.        | A/wigeon/England/SA12_158143/2017                       | 2017.008 | AAAAA8AA  |
| 274390 | 274390 | 274390 | 274390 | 274390 | 0      | 274390 | 274390 | 274390 | H5N8 | U.K.        | A/wigeon/Wales/052833/2016                              | 2016.951 | AAAAA8AA  |
| 274858 | 274858 | 274858 | 274858 | 274858 | 0      | 274858 | 274858 | 274858 | H5N8 | Russia      | A/mute_swan/Kalinograd/132/2017                         | 2017.118 | AADA8AA   |
| 275283 | 275283 | 275283 | 275283 | 275283 | 0      | 275283 | 275283 | 275283 | H5N8 | Russia      | A/chicken/Shchyolkovo/47/2017                           | 2017.173 | AAAAA8AA  |
| 275287 | 275287 | 275287 | 275287 | 275287 | 0      | 275287 | 275287 | 275287 | H5N8 | Russia      | A/chicken/Rostov-on-Don/44/2017                         | 2017.293 | AAAAA8AA  |
| 275288 | 275288 | 275288 | 275288 | 275288 | 0      | 275288 | 275288 | 275288 | H5N8 | Russia      | A/chicken/Tatarstan/88/2017                             | 2017.348 | AAAAA8AA  |
| 287564 | 287564 | 287564 | 287564 | 287564 | 287564 | 0      | 287564 | 287564 | H5N5 | Netherlands | A/T_Dk/NL-Werkendam/16014159-001/2016                   | 2016.868 | AAGAA5AA  |
| 287565 | 287565 | 287565 | 287565 | 287565 | 287565 | 0      | 287565 | 287565 | H5N5 | Netherlands | A/M_Swan/NL-Groningen/16015826-001/2016                 | 2016.948 | DCBAE5AA  |
| 288364 | 288364 | 288364 | 288364 | 288364 | 0      | 0      | 288364 | 288364 | H5N6 | Greece      | A/chicken/Greece/39_2017b/2017                          | 2017.099 | AAAAA8AA  |
| 288438 | 288438 | 288438 | 288438 | 288438 | 0      | 288438 | 288438 | 288438 | H5N8 | Korea       | A/chicken/Korea/Gunsan/2017                             | 2017.419 | CAEAF8AA  |
| 288439 | 288439 | 288439 | 288439 | 288439 | 0      | 288439 | 288439 | 288439 | H5N8 | Korea       | A/chicken/Korea/Gimje2/2017                             | 2017.099 | CAEAF8AA  |
| 295492 | 295492 | 295492 | 295492 | 295492 | 0      | 295492 | 295492 | 295492 | H5N8 | China       | A/Anser_cygnoides/Hubei/FW44/2016                       | 2016.948 | CAEAF8AA  |
| 295493 | 295493 | 295493 | 295493 | 295493 | 0      | 295493 | 295493 | 295493 | H5N8 | China       | A/Cygnus atratus/Hubei/ZZ2-0/2016                       | 2016.989 | CABAD8AA  |
| 295494 | 295494 | 295494 | 295494 | 295494 | 0      | 295494 | 295494 | 295494 | H5N8 | China       | A/Cygnus atratus/Hubei/HF-1/2016                        | 2016.967 | CABAD8AA  |
| 297388 | 297388 | 297388 | 297388 | 297388 | 0      | 297388 | 297388 | 297388 | H5N8 | Macedonia   | A/chicken/Republic_of_Macedonia/466/2017                | 2017.074 | BABAB8AA  |
| 300547 | 300547 | 300547 | 300547 | 300547 | 0      | 300547 | 300547 | 300547 | H5N8 | Ukraine     | A/White-fronted_Goose/AN/1-15-12/2016                   | 2016.953 | AAAAA8AA  |
| 300548 | 300548 | 300548 | 300548 | 300548 | 0      | 300548 | 300548 | 300548 | H5N8 | Ukraine     | A/Ruddy_Shelduck/AN/2-14-12/2016                        | 2016.951 | AAAAA8AA  |
| 300686 | 300686 | 300686 | 300686 | 300686 | 0      | 300686 | 300686 | 300686 | H5N8 | Poland      | A/turkey/Poland/63/2016                                 | 2016.945 | BDBAB8AA  |
| 300687 | 300687 | 300687 | 300687 | 300687 | 0      | 300687 | 300687 | 300687 | H5N8 | Poland      | A/chicken/Poland/34/2017                                | 2017.027 | BDBAB8AA  |
| 300693 | 300693 | 300693 | 300693 | 300693 | 0      | 300693 | 300693 | 300693 | H5N8 | Poland      | A/domestic_duck/Poland/47/2017                          | 2017.041 | BABAB8AA  |
| 300698 | 300698 | 300698 | 300698 | 300698 | 0      | 300698 | 300698 | 300698 | H5N8 | Poland      | A/turkey/Poland/54/2017                                 | 2017.047 | BABAB8AA  |
| 300699 | 300699 | 300699 | 300699 | 300699 | 0      | 300699 | 300699 | 300699 | H5N8 | Poland      | A/domestic_goose/Poland/69/2017                         | 2017.071 | BDBAB8AA  |
| 300745 | 300745 | 300745 | 300745 | 300745 | 0      | 300745 | 300745 | 300745 | H5N8 | Poland      | A/wild_duck/Poland/57/2017                              | 2017.071 | AAAAA8AA  |
| 300746 | 300746 | 300746 | 300746 | 300746 | 0      | 0      | 0      | 300746 | H5N5 | Poland      | A/swan/Poland/81/2017                                   | 2017.088 | DCBAE5AA  |
| 308802 | 308802 | 308802 | 308802 | 308802 | 0      | 308802 | 308802 | 308802 | H5N8 | Congo       | A/duck/Democratic_Republic_of_the_Congo/17RS882-29/2017 | 2017.367 | CABAD8AA  |
| 308804 | 308804 | 308804 | 308804 | 308804 | 0      | 308804 | 308804 | 308804 | H5N8 | Congo       | A/duck/Democratic_Republic_of_the_Congo/17RS882-40/2017 | 2017.362 | CABAD8AA  |
| 308806 | 308806 | 308806 | 308806 | 308806 | 0      | 308806 | 308806 | 308806 | H5N8 | Cameroon    | A/chicken/Cameroon/17RS1661-1/2017                      | 2017.038 | CAEAF8AA  |
| 308807 | 308807 | 308807 | 308807 | 308807 | 0      | 308807 | 308807 | 308807 | H5N8 | Cameroon    | A/duck/Cameroon/17RS1661-3/2017                         | 2017.038 | CABAD8AA  |
| 309194 | 309194 | 309194 | 309194 | 309194 | 0      | 309194 | 309194 | 309194 | H5N8 | Belgium     | A/Anas_platyrhynchos/Belgium/1899/2017                  | 2017.156 | BABAB8AA  |
| 309195 | 309195 | 309195 | 309195 | 309195 | 0      | 309195 | 309195 | 309195 | H5N8 | Belgium     | A/Cygnus_olor/Belgium/2967/2017                         | 2017.216 | BDBAB8AA  |
| 309196 | 309196 | 309196 | 309196 | 309196 | 0      | 309196 | 309196 | 309196 | H5N8 | Belgium     | A/Buteo_buteo/Belgium/3022/2017                         | 2017.222 | BABAB8AA  |
| 309198 | 309198 | 309198 | 309198 | 309198 | 0      | 309198 | 309198 | 309198 | H5N8 | Belgium     | A/Guinea_fowl/Belgium/6102/2017                         | 2017.449 | AAAAA8AA  |
| 0      | 0      | 0      | 243049 | 243049 | 243049 | 0      | 243049 | 243049 | H5N5 | Germany     | A/turkey/Germany-SH/R425/2017                           | 2017.058 | 000AG5AA  |
| 0      | 0      | 0      | 250920 | 0      | 250920 | 0      | 250920 | 0      | H5N5 | Czechia     | A/mute_swan/Czech_Republic/2031-17/2017                 | 2017.107 | 000A0A0A0 |
| 0      | 0      | 0      | 268981 | 0      | 0      | 0      | 0      | 0      | H5N5 | Czechia     | A/spot-billed_pelican/Czech_Republic/2270-              | 2017.121 | 000A00000 |



|   |   |   |        |   |   |   |   |   |      |         |                                                                          |          |           |
|---|---|---|--------|---|---|---|---|---|------|---------|--------------------------------------------------------------------------|----------|-----------|
| 0 | 0 | 0 | 268993 | 0 | 0 | 0 | 0 | 0 | H5N8 | Czechia | 17/2017_-H5N5-<br>A/chicken/Czech_R<br>epublic/4231-<br>17_2/2017_-H5N8- | 2017.216 | 000A00000 |
|---|---|---|--------|---|---|---|---|---|------|---------|--------------------------------------------------------------------------|----------|-----------|

**Table S4.** Expanded dataset (ii) of gene sequences, with 251-279 sequences per internal segment, 284 sequences for segment 4 (H5), 236 sequences for segment 6 (N8), and 20 sequences for segment 6 (N5), used for BEAST analysis.

| SequenceName                                                                           | Country     | Bird                  | HostType <sup>a</sup> | Seg1 | Seg2 | Seg3 | Seg4-H5 | Seg5 | Seg6-N5 | Seg6-N8 | Seg7 | Seg8 |
|----------------------------------------------------------------------------------------|-------------|-----------------------|-----------------------|------|------|------|---------|------|---------|---------|------|------|
| 253036 H5N8 U.K. A turkey/England/003778/2017 2017.038                                 | U.K.        | turkey                | Dom-gal               | A    | A    | A    | A       | A    | 0       | A       | A    | A    |
| 239801 H5N8 U.K. A turkey/England/052131/2016 2016.953                                 | U.K.        | turkey                | Dom-gal               | A    | A    | A    | A       | A    | 0       | A       | A    | A    |
| 274389 H5N8 U.K. A wigeon/England/SA12_158143/2017 2017.008                            | U.K.        | wigeon                | Wild-ans-long         | A    | A    | A    | A       | A    | 0       | A       | A    | A    |
| 253038 H5N8 U.K. A pochard_duck/England/SA12_157809/2016 2016.964                      | U.K.        | pochardduck           | Wild-ans              | A    | A    | A    | A       | A    | 0       | A       | A    | A    |
| 255913 H5N8 Netherlands A Mallard/Netherlands/2/2017 2017.016                          | Netherlands | mallard               | Wild-ans              | A    | A    | A    | A       | A    | 0       | A       | A    | A    |
| 274387 H5N8 U.K. A teal/Wales/SA26_312553/2016 2016.989                                | U.K.        | teal                  | Wild-ans              | A    | A    | A    | A       | A    | 0       | A       | A    | A    |
| 255891 H5N8 Netherlands A Tufted_Duck/Netherlands/1/2016 2016.899                      | Netherlands | tuftedduck            | Wild-ans              | A    | A    | A    | A       | A    | 0       | A       | A    | A    |
| 262055 H5N8 Germany A eurasian_wigeon/Germany-NI/AR249-L02143/2017_01/04/2017 2017.008 | Germany     | eurasianwigeon        | Wild-ans-long         | A    | A    | A    | A       | A    | 0       | A       | A    | A    |
| 253037 H5N8 U.K. A chicken/Wales/000023/2016 2016.997                                  | U.K.        | chicken               | Dom-gal               | A    | A    | A    | A       | A    | 0       | A       | A    | A    |
| 255184 H5N8 Italy A chicken/Italy/17VIR653-12/2017 2017.066                            | Italy       | chicken               | Dom-gal               | A    | A    | A    | A       | A    | 0       | A       | A    | A    |
| 256298 H5N8 Russia A gadwall/Kurgan/2442/2016 2016.652                                 | Russia      | gadwall               | Wild-ans              | A    | A    | A    | A       | A    | 0       | A       | A    | A    |
| 247724 H5N8 Russia A wild_duck/Tatarstan/3059/2016 2016.751                            | Russia      | wildduck              | Wild-ans              | A    | A    | A    | A       | A    | 0       | A       | A    | A    |
| 247725 H5N8 Russia A chicken/Kalmykia/2643/2016 2016.888                               | Russia      | chicken               | Dom-gal               | A    | A    | A    | A       | A    | 0       | A       | A    | A    |
| 255212 H5N8 Hungary A Greylag_goose/Hungary/320/2017 2017.008                          | Hungary     | greylaggoose          | Wild-ans-long         | A    | A    | A    | A       | A    | 0       | A       | A    | A    |
| 255220 H5N8 Hungary A Mallard/Hungary/1574a/2017 2017.036                              | Hungary     | mallard               | Wild-ans              | A    | A    | A    | A       | A    | 0       | A       | A    | A    |
| 255206 H5N8 Hungary A Peregrine_falcon/Hungary/4882/2017 2017.101                      | Hungary     | peregrinefalcon       | Wild-other            | A    | A    | A    | A       | A    | 0       | A       | A    | A    |
| 257423 H5N8 Georgia A mallard/Republic_of_Georgia/2/2016 2016.937                      | Georgia     | mallard               | Wild-ans              | A    | A    | A    | A       | A    | 0       | A       | A    | A    |
| 255181 H5N8 Italy A swan/Italy/17VIR537-2/2017 2017.049                                | Italy       | swan                  | Wild-ans              | A    | A    | A    | A       | A    | 0       | A       | A    | A    |
| 255194 H5N8 Hungary A Goose/Hungary/1030/2017 2017.027                                 | Hungary     | goose                 | Dom-ans               | A    | A    | A    | A       | A    | 0       | A       | A    | A    |
| 239997 H5N8 France A decoy_duck/France/161104e/2016 2016.901                           | France      | decoyduck             | Wild-ans              | A    | A    | A    | A       | A    | 0       | A       | A    | A    |
| 247721 H5N8 Russia A turkey/Rostov/11/2017 2017.000                                    | Russia      | turkey                | Dom-gal               | A    | A    | A    | A       | A    | 0       | A       | A    | A    |
| 247720 H5N8 Russia A chicken/Voronezh/20/2017 2017.014                                 | Russia      | chicken               | Dom-gal               | A    | A    | A    | A       | A    | 0       | A       | A    | A    |
| 247716 H5N8 Russia A Ural_owl/Voronezh/14/2017 2017.014                                | Russia      | uralowl               | Wild-other            | A    | A    | A    | A       | A    | 0       | A       | A    | A    |
| 247717 H5N8 Russia A long-eared_owl/Voronezh/16/2017 2017.014                          | Russia      | long-earedowl         | Wild-other            | A    | A    | A    | A       | A    | 0       | A       | A    | A    |
| 247722 H5N8 Russia A goose/Krasnodar/3144/2017 2017.014                                | Russia      | goose                 | Dom-ans               | A    | A    | A    | A       | A    | 0       | A       | A    | A    |
| 255183 H5N8 Italy A turkey/Italy/17VIR576-11/2017 2017.060                             | Italy       | turkey                | Dom-gal               | A    | A    | A    | A       | A    | 0       | A       | A    | A    |
| 247723 H5N8 Russia A mute_swan/Krasnodar/25/2017 2017.014                              | Russia      | muteswan              | Wild-ans              | A    | A    | A    | A       | A    | 0       | A       | A    | A    |
| 256300 H5N8 Russia A chicken/Sergiyev_Posad/39/2017 2017.164                           | Russia      | chicken               | Dom-gal               | A    | A    | A    | A       | A    | 0       | A       | A    | A    |
| 266536 H5N8 Belgium A chicken/Belgium/807/2017 2017.085                                | Belgium     | chicken               | Dom-gal               | A    | A    | A    | A       | A    | 0       | A       | A    | A    |
| 266537 H5N8 Belgium A peacock/Belgium/1017/2017 2017.104                               | Belgium     | peacock               | Wild-other            | A    | A    | A    | A       | A    | 0       | A       | A    | A    |
| 242902 H5N8 Italy A wigeon/Italy/17VIR57-3/2017 2017.005                               | Italy       | wigeon                | Wild-ans-long         | A    | A    | A    | A       | A    | 0       | A       | A    | A    |
| 238896 H5N8 Sweden A Chicken/Sweden/5VA161122KU0453/SZ0209321/2016 2016.888            | Sweden      | chicken               | Dom-gal               | A    | A    | A    | A       | A    | 0       | A       | A    | A    |
| 255892 H5N8 Netherlands A Great_Black-backed_Gull/Netherlands/2/2016 2016.893          | Netherlands | greatblack-backedgull | Wild-other            | A    | A    | A    | A       | A    | 0       | A       | A    | A    |
| 255409 H5N8 Netherlands A duck/Netherlands/16014829-011-015/2016 2016.899              | Netherlands | duck                  | Dom-ans               | A    | A    | A    | A       | A    | 0       | A       | A    | A    |
| 255628 H5N8 France A chicken/France/161585/2016 2016.995                               | France      | chicken               | Dom-gal               | A    | A    | A    | A       | A    | 0       | A       | A    | A    |
| 262057 H5N8 Germany A mute_swan/Germany-NI/AR1529-L02145/2017 2017.121                 | Germany     | muteswan              | Wild-ans              | A    | A    | A    | A       | A    | 0       | A       | A    | A    |
| 255910 H5N8 Netherlands A Mew_Gull/Netherlands/1/2016 2016.893                         | Netherlands | mewgull               | Wild-other            | A    | A    | A    | A       | A    | 0       | A       | A    | A    |
| 255411 H5N8 Netherlands A chicken/Netherlands/16016112-001-005 2016.945                | Netherlands | chicken               | Dom-gal               | A    | A    | A    | A       | A    | 0       | A       | A    | A    |
| 274385 H5N8 U.K. A black_headed_gull/England/SA12_157807/2016 2016.964                 | U.K.        | blackheadedgull       | Wild-other            | A    | A    | A    | A       | A    | 0       | A       | A    | A    |
| 255400 H5N8 Netherlands A eurasian_wigeon                                              | Netherlands | eurasianwigeon        | Wild-ans-long         | A    | A    | A    | A       | A    | 0       | A       | A    | A    |

|                                                                                      |             |                       |               |   |   |   |   |   |   |   |   |   |   |
|--------------------------------------------------------------------------------------|-------------|-----------------------|---------------|---|---|---|---|---|---|---|---|---|---|
| on/Netherlands/16015273-002/2016 2016.915                                            |             |                       |               |   |   |   |   |   |   |   |   |   |   |
| 274390 H5N8 U.K. A/wigeon/Wales/052833/2016 2016.951                                 | U.K.        | wigeon                | Wild-ans-long | A | A | A | A | A | A | 0 | A | A | A |
| 237921 H5N8 Poland A/wild_duck/Poland/82A/2016 2016.836                              | Poland      | wildduck              | Wild-ans      | A | A | A | A | A | A | 0 | A | A | A |
| 255626 H5N8 France A/eurasianwigeon/France/161323/2016 2016.970                      | France      | eurasianwigeon        | Wild-ans-long | A | A | A | A | A | A | 0 | A | A | A |
| 239436 H5N8 Switzerland A/tufted_duck/Switzerland/V237-L02003/2016 2016.871          | Switzerland | tuftedduck            | Wild-ans      | A | A | A | A | A | A | 0 | A | A | A |
| 257699 H5N8 Switzerland A/Tufted_Duck/Switzerland/V237/2016 2016.866                 | Switzerland | tuftedduck            | Wild-ans      | A | A | A | A | A | A | 0 | A | A | A |
| 255209 H5N8 Hungary A/Common_tern/Hungary/8187/2017 2017.159                         | Hungary     | commontern            | Wild-other    | A | A | A | A | A | A | 0 | A | A | A |
| 239437 H5N8 Switzerland A/caspian_gull/Switzerland/V247-L02004/2016 2016.871         | Switzerland | caspian_gull          | Wild-other    | A | A | A | A | A | A | 0 | A | A | A |
| 255405 H5N8 Netherlands A/tufted_duck/Netherlands/16013976-001/2016 2016.855         | Netherlands | tuftedduck            | Wild-ans      | A | A | A | A | A | A | 0 | A | A | A |
| 238897 H5N8 Sweden A/Common_Goldeneye/Sweden/SVA161117KU0322/SZ0002165/2016 2016.868 | Sweden      | commongoldeneye       | Wild-ans      | A | A | A | A | A | A | 0 | A | A | A |
| 237944 H5N8 Germany A/tufted_duck/Germany/AR844-L01987/2016 2016.849                 | Germany     | tuftedduck            | Wild-ans      | A | A | A | A | A | A | 0 | A | A | A |
| 247713 H5N8 Denmark A/tufted_duck/Denmark/17740-1/2016 2016.852                      | Denmark     | tuftedduck            | Wild-ans      | A | A | A | A | A | A | 0 | A | A | A |
| 234057 H5N8 Russia A/grey_heron_/Uvs-Nuur_Lake/20/2016 2016.395                      | Russia      | greyheron             | Wild-other    | C | A | B | A | D | D | 0 | A | A | A |
| 230820 H5N8 Russia A/great_crested_grebe/Tyva/34/2016 2016.395                       | Russia      | greatcrestedgrebe     | Wild-other    | C | A | B | A | D | D | 0 | A | A | A |
| 231685 H5N8 Russia A/black-headed_gull/Tyva/41/2016 2016.395                         | Russia      | black-headedgull      | Wild-other    | C | A | B | A | D | D | 0 | A | A | A |
| 234058 H5N8 Russia A/common_tern_/Uvs-Nuur_Lake/26/2016 2016.395                     | Russia      | commontern            | Wild-other    | C | A | B | A | D | D | 0 | A | A | A |
| 231684 H5N8 Russia A/wild_duck/Tyva/35/2016 2016.395                                 | Russia      | wildduck              | Wild-ans      | C | A | B | A | D | D | 0 | A | A | A |
| 224752 H5N8 China A/Great_Black-headed_Gull/Qinghai/YO1-B/2016 2016.367              | China       | greatblack-headedgull | Wild-other    | C | A | B | A | D | D | 0 | A | A | A |
| 224743 H5N8 China A/Brown-headed_Gull/Qinghai/ZT01-LU/2016 2016.329                  | China       | brown-headedgull      | Wild-other    | C | A | B | A | D | D | 0 | A | A | A |
| 224726 H5N8 China A/Bar-headed_Goose/Qinghai/BTY11-LU/2016 2016.351                  | China       | bar-headedgoose       | Wild-ans      | C | A | B | A | D | D | 0 | A | A | A |
| 224751 H5N8 China A/Brown-headed_Gull/Qinghai/ZT06-MU/2016 2016.367                  | China       | brown-headedgull      | Wild-other    | C | A | B | A | D | D | 0 | A | A | A |
| 274386 H5N8 U.K. A/mute_swan/England/S A21_161831/2017 2017.164                      | U.K.        | muteswan              | Wild-ans      | C | C | B | A | D | D | 0 | A | A | A |
| 224580 H5N8 Russia A/great_crested_grebe/Uvs-Nuur_Lake/341/2016 2016.395             | Russia      | greatcrestedgrebe     | Wild-other    | C | A | B | A | D | D | 0 | A | A | A |
| 266421 H5N8 Korea A/common_teal/Korea/W555/2017 2017.008                             | Korea       | commonteal            | Wild-ans-long | C | A | E | A | F | F | 0 | A | A | A |
| 266420 H5N8 Korea A/common_teal/Korea/W550/2016 2016.953                             | Korea       | commonteal            | Wild-ans-long | C | A | E | A | F | F | 0 | A | A | A |
| 272859 H5N8 Korea A/grey_heron/W779/2017 2017.071                                    | Korea       | greyheron             | Wild-other    | C | A | E | A | F | F | 0 | A | A | A |
| 254745 H5N8 Korea A/mallard_duck/Korea/WA137/2017 2017.063                           | Korea       | mallard               | Wild-ans      | C | A | E | A | F | F | 0 | A | A | A |
| 237554 H5N8 India A/painted_stork/India/10CA03/2016 2016.800                         | India       | paintedstork          | Wild-other    | C | A | E | A | F | F | 0 | A | A | A |
| 267136 H5N8 Egypt A/green-winged_teal/Egypt/877/2016 2016.934                        | Egypt       | green-wingedteal      | Wild-ans-long | C | A | E | A | F | F | 0 | A | A | A |
| 255182 H5N8 Italy A/turkey/Italy/17VIR538-1/2017 2017.052                            | Italy       | turkey                | Dom-gal       | C | A | E | A | F | F | 0 | A | A | A |
| 250231 H5N8 Russia A/domestic_duck/Siberia/49_feather/2016 2016.690                  | Russia      | domestic_duck         | Dom-ans       | C | A | E | A | F | F | 0 | A | A | A |
| 240677 H5N8 Russia A/domestic_duck/Siberia/103/2016 2016.756                         | Russia      | domesticduck          | Dom-ans       | C | A | E | A | F | F | 0 | A | A | A |
| 237553 H5N8 India A/duck/India/10CA01/2016 2016.792                                  | India       | duck                  | Dom-ans       | C | A | B | A | A | A | 0 | A | A | A |
| 261946 H5N8 Israel A/chicken/Israel/AR1794-L02146/2016 2016.855                      | Israel      | chicken               | Dom-gal       | C | A | B | A | E | E | 0 | A | A | A |
| 240110 H5N8 Russia A/chicken/Astrakhan/3131/2016 2016.948                            | Russia      | chicken               | Dom-gal       | C | A | B | A | E | E | 0 | A | A | A |
| 224740 H5N8 China A/Bar-headed_Goose/Qinghai/BTY18-LU/2016_2016.367                  | China       | bar-headedgoose       | Wild-ans      | C | A | B | A | D | D | 0 | A | A | A |
| 238037 H5N8 Germany A/turkey/Germany-SH/R8595/2016 2016.855                          | Germany     | turkey                | Dom-gal       | A | A | A | A | A | A | 0 | A | A | A |
| 249691 H5N8 Germany A/chicken/Germany-MV/R10048/2016 2016.904                        | Germany     | chicken               | Dom-gal       | A | A | A | A | A | A | 0 | A | A | A |
| 249692 H5N8 Germany A/chicken/Germany-NI/R11406/2016 2016.978                        | Germany     | chicken               | Dom-gal       | A | A | A | A | A | A | 0 | A | A | A |
| 255914 H5N8 Netherlands A/Eurasian_Wigeon/Netherlands/9/2016 2016.923                | Netherlands | eurasianwigeon        | Wild-ans-long | A | A | A | A | A | A | 0 | A | A | A |
| 256818 H5N8 Germany A/domestic_duck/Germany-MV/R9764/2016 2016.888                   | Germany     | domesticduck          | Dom-ans       | A | A | A | A | A | A | 0 | A | A | A |
| 268618 H5N8 Netherlands A/Bk_swan/NL-Den_Oever/16013973-002/2016 2016.858            | Netherlands | blackswan             | Wild-ans      | A | A | A | A | A | A | 0 | A | A | A |

|                                                                                    |             |                       |               |   |   |   |   |   |   |   |   |   |
|------------------------------------------------------------------------------------|-------------|-----------------------|---------------|---|---|---|---|---|---|---|---|---|
| 268619 H5N8 Netherlands A Bl_H_gull/NL-Slootdorp/16014102-002/2016 2016.860        | Netherlands | black-headedgull      | Wild-other    | A | A | A | A | A | 0 | A | A | A |
| 268620 H5N8 Netherlands A Buzard/NL-Durgedam/16015100-004/2016 2016.912            | Netherlands | buzzard               | Wild-other    | A | A | D | A | A | 0 | A | A | A |
| 268621 H5N8 Netherlands A C_Gull/NL-Slootdorp/16014102-003/2016 2016.860           | Netherlands | commongull            | Wild-other    | A | A | A | A | A | 0 | A | A | A |
| 268622 H5N8 Netherlands A Ch/NL-Abbegea/X16015736/2016 2016.945                    | Netherlands | chicken               | Dom-gal       | A | A | A | A | A | 0 | A | A | A |
| 268623 H5N8 Netherlands A Ch/NL-Boven_Leeuwen/16016151-006-010/2016 2016.964       | Netherlands | chicken               | Dom-gal       | A | A | A | A | A | 0 | A | A | A |
| 268624 H5N8 Netherlands A Ch/NL-Den_Oever/16014231-001/2016 2016.871               | Netherlands | chicken               | Dom-gal       | A | A | A | A | A | 0 | A | A | A |
| 268625 H5N8 Netherlands A Ch/NL-Hiaure/16016112-001-005/2016 2016.959              | Netherlands | chicken               | Dom-gal       | A | A | A | A | A | 0 | A | A | A |
| 268626 H5N8 Netherlands A Ch/NL-Rhenen/16016141-006/2016 2016.959                  | Netherlands | chicken               | Dom-gal       | A | A | A | A | A | 0 | A | A | A |
| 268627 H5N8 Netherlands A Ch/NL-Zoeterwoude/16016484-021-025/2016 2016.978         | Netherlands | chicken               | Dom-gal       | A | A | A | A | A | 0 | A | A | A |
| 268628 H5N8 Netherlands A Crow/NL-Oostwoud/16015372-004/2016 2016.926              | Netherlands | crow                  | Wild-other    | A | A | D | A | A | 0 | A | A | A |
| 268629 H5N8 Netherlands A Dk/NL-Biddinghuizen/16014829-011-015/2016 2016.899       | Netherlands | duck                  | Dom-ans       | A | A | A | A | A | 0 | A | A | A |
| 268630 H5N8 Netherlands A Dk/NL-Biddinghuizen/16015083-016-020/2016 2016.912       | Netherlands | duck                  | Dom-ans       | A | A | A | A | A | 0 | A | A | A |
| 268632 H5N8 Netherlands A Dk/NL-Kampervveen/16016104-001-005/2016 2016.953         | Netherlands | duck                  | Dom-ans       | A | A | A | A | A | 0 | A | A | A |
| 268633 H5N8 Netherlands A Dk/NL-Rotterdam/16014008-001-005/2016 2016.858           | Netherlands | duck                  | Dom-ans       | A | A | A | A | A | 0 | A | A | A |
| 268634 H5N8 Netherlands A Dk/NL-Stolwijk/16016291-016-020/2016 2016.970            | Netherlands | duck                  | Dom-ans       | A | A | A | A | A | 0 | A | A | A |
| 268635 H5N8 Netherlands A Eur_Wig/NL-Akkrum/16015817-003/2016 2016.948             | Netherlands | anaspenelope          | Wild-ans-long | A | A | A | A | A | 0 | A | A | A |
| 268637 H5N8 Netherlands A Eur_Wig/NL-De_Waal_(Texel)/16014891-004/2016 2016.904    | Netherlands | anaspenelope          | Wild-ans-long | A | A | A | 0 | A | 0 | A | A | A |
| 268638 H5N8 Netherlands A Eur_Wig/NL-Drieborg_(Dollard)/16015513-001/2016 2016.929 | Netherlands | anaspenelope          | Wild-ans-long | A | A | A | 0 | A | 0 | A | A | A |
| 268639 H5N8 Netherlands A Eur_Wig/NL-Enumatil-Groningen/16015704-001/2016 2016.942 | Netherlands | anaspenelope          | Wild-ans-long | A | A | A | A | A | 0 | A | A | A |
| 268640 H5N8 Netherlands A Eur_Wig/NL-Ferwert/16015273-002/2016 2016.915            | Netherlands | anaspenelope          | Wild-ans-long | A | A | A | A | A | 0 | A | A | A |
| 268641 H5N8 Netherlands A Eur_Wig/NL-Gouda/16015824-001/2016 2016.948              | Netherlands | anaspenelope          | Wild-ans-long | A | A | A | A | A | 0 | A | A | A |
| 268642 H5N8 Netherlands A Eur_Wig/NL-Greonterp/16015653-001/2016 2016.934          | Netherlands | anaspenelope          | Wild-ans-long | A | A | A | A | A | 0 | A | A | A |
| 268643 H5N8 Netherlands A Eur_Wig/NL-Groningen/16015376-003/2016 2016.926          | Netherlands | anaspenelope          | Wild-ans-long | A | A | D | A | A | 0 | A | A | A |
| 268644 H5N8 Netherlands A Eur_Wig/NL-Leeuwarden/16015699-002/2016 2016.940         | Netherlands | anaspenelope          | Wild-ans-long | A | A | A | A | A | 0 | A | A | A |
| 268645 H5N8 Netherlands A Eur_Wig/NL-Leidschendam/16015697-007/2016 2016.940       | Netherlands | anaspenelope          | Wild-ans-long | A | A | A | A | A | 0 | A | A | A |
| 268646 H5N8 Netherlands A Eur_Wig/NL-Reeuwijk/16015903-003/2016 2016.948           | Netherlands | anaspenelope          | Wild-ans-long | A | A | A | A | A | 0 | A | A | A |
| 268647 H5N8 Netherlands A Eur_Wig/NL-Terschelling/16015692-010/2016 2016.937       | Netherlands | anaspenelope          | Wild-ans-long | A | A | A | A | A | 0 | A | A | A |
| 268648 H5N8 Netherlands A Eur_Wig/NL-Vianen/16015917-006/2016 2016.948             | Netherlands | anaspenelope          | Wild-ans-long | A | A | A | A | A | 0 | A | A | A |
| 268649 H5N8 Netherlands A Eur_Wig/NL-Walterswald/16015923-003/2016 2016.951        | Netherlands | anaspenelope          | Wild-ans-long | A | A | A | A | A | 0 | A | A | A |
| 268650 H5N8 Netherlands A Eur_Wig/NL-West_Grafdijk/16015746-003/2016 2016.945      | Netherlands | anaspenelope          | Wild-ans-long | A | A | A | A | A | 0 | A | A | A |
| 268651 H5N8 Netherlands A Eur_Wig/NL-Wormer/16016143-002/2016 2016.962             | Netherlands | anaspenelope          | Wild-ans-long | A | A | A | A | A | 0 | A | A | A |
| 268652 H5N8 Netherlands A Eur_Wig/NL-Zoeterwoude/16015702-010/2016 2016.940        | Netherlands | anaspenelope          | Wild-ans-long | A | A | A | A | A | 0 | A | A | A |
| 268653 H5N8 Netherlands A Eur_Wig/NL-Zwolle/16015820-002/2016 2016.948             | Netherlands | anaspenelope          | Wild-ans-long | A | A | A | A | A | 0 | A | A | A |
| 268654 H5N8 Netherlands A G_c_grebe/NL-Monnickendam/16013865-009-010/2016 2016.852 | Netherlands | greatcrestedgrebe     | Wild-other    | A | A | D | A | A | 0 | A | A | A |
| 268655 H5N8 Netherlands A Go/NL-Roggebotsluis/16014462-010/2016 2016.877           | Netherlands | goose                 | Dom-ans       | A | A | D | A | A | 0 | A | A | A |
| 268656 H5N8 Netherlands A Gr_bk_bd_gull/NL-Slootdorp/16014102-005/2016 2016.860    | Netherlands | greatblack-backedgull | Wild-other    | A | A | D | A | A | 0 | A | A | A |
| 268657 H5N8 Netherlands A Grey_Go/NL-                                              | Netherlands | anseranser            | Wild-ans-long | A | A | A | A | A | 0 | A | A | A |

|                                                                                          |             |                        |               |   |   |   |   |   |   |   |   |   |
|------------------------------------------------------------------------------------------|-------------|------------------------|---------------|---|---|---|---|---|---|---|---|---|
| Groot-Ammers/16015901-012/2016 2016.951                                                  |             |                        |               |   |   |   |   |   |   |   |   |   |
| 268658 H5N8 Netherlands A/Gull/NL-Marker_Wadden/16014466-020/2016 2016.877               | Netherlands | gull                   | Wild-other    | A | A | A | A | A | 0 | A | A | A |
| 268659 H5N8 Netherlands A/Gull1/NL-Marker_Wadden/16014466-011/2016 2016.877              | Netherlands | gull                   | Wild-other    | A | A | D | A | A | 0 | A | A | A |
| 268660 H5N8 Netherlands A/Gull10/NL-Marker_Wadden/16014466-014/2016 2016.877             | Netherlands | gull                   | Wild-other    | A | A | A | A | A | 0 | A | A | A |
| 268661 H5N8 Netherlands A/L-bl-ba-gull/NL-Sovon/16014324-014/2016 2016.874               | Netherlands | lesserblack-backedgull | Wild-other    | A | A | D | A | A | 0 | A | A | A |
| 268662 H5N8 Netherlands A/M_Swan/NL-Roggebotsluis/16014462-019/2016 2016.877             | Netherlands | muteswan               | Wild-ans      | A | A | A | A | A | 0 | A | A | A |
| 268663 H5N8 Netherlands A/Maggie/NL-Volendam/16014331-002/2016 2016.874                  | Netherlands | maggie                 | Wild-other    | A | A | D | A | A | 0 | A | A | A |
| 268664 H5N8 Netherlands A/Mal/NL-IJsselmuiden/16015448-002/2016 2016.929                 | Netherlands | anasplatyrhynch os     | Wild-ans      | A | A | A | A | A | 0 | A | A | A |
| 268665 H5N8 Netherlands A/Mal/NL-Mastenbroek/16015378-002/2016 2016.926                  | Netherlands | anasplatyrhynch os     | Wild-ans      | A | A | D | A | A | 0 | A | A | A |
| 268666 H5N8 Netherlands A/P_falcon/NL-Vrouwenpolder_(Zeeland)/16015510-001/2016 2016.932 | Netherlands | peregrinefalcon        | Wild-other    | A | A | D | 0 | A | 0 | A | A | A |
| 268667 H5N8 Netherlands A/Sea_eagle/NL-Aspen/16015398-002/2016 2016.926                  | Netherlands | seaeagle               | Wild-other    | A | A | A | A | A | 0 | A | A | A |
| 268668 H5N8 Netherlands A/T_Dk/NL-Almeerder_Zand/16014341-003/2016 2016.874              | Netherlands | tuftedduck             | Wild-ans      | A | A | A | A | A | 0 | A | A | A |
| 268669 H5N8 Netherlands A/T_Dk/NL-Monnickendam/16013865-006-008/2016 2016.852            | Netherlands | tuftedduck             | Wild-ans      | A | A | D | A | A | 0 | A | A | A |
| 268670 H5N8 Netherlands A/T_Dk/NL-Roggebotsluis/16014462-015/2016 2016.877               | Netherlands | tuftedduck             | Wild-ans      | A | A | A | A | A | 0 | A | A | A |
| 268671 H5N8 Netherlands A/T_Dk/NL-Rotterdam/16014155-001/2016 2016.868                   | Netherlands | tuftedduck             | Wild-ans      | A | A | A | A | A | 0 | A | A | A |
| 268673 H5N8 Netherlands A/T_Dk/NL-Werkendam/16014159-003/2016 2016.868                   | Netherlands | tuftedduck             | Wild-ans      | A | A | D | A | A | 0 | A | A | A |
| 268679 H5N8 Netherlands A/T_Dk/NL-Zeewolde/16013976-006/2016 2016.855                    | Netherlands | tuftedduck             | Wild-ans      | A | A | A | A | A | 0 | A | A | A |
| 268681 H5N8 Netherlands A/T_Dk/NL-Zuidoost_Beemster/16014148-009/2016 2016.868           | Netherlands | tuftedduck             | Wild-ans      | A | A | A | A | A | 0 | A | A | A |
| 268682 H5N8 Netherlands A/Teal/NL-Ferwert/16015273-013/2016 2016.915                     | Netherlands | teal                   | Wild-ans      | A | A | A | A | A | 0 | A | A | A |
| 273846 H5N8 Italy A/chicken/Italy/17VIR3078/2017 2017.263                                | Italy       | chicken                | Dom-gal       | A | A | A | A | A | 0 | A | A | A |
| 273847 H5N8 Italy A/turkey/Italy/17VIR5878-3/2017 2017.556                               | Italy       | turkey                 | Dom-gal       | A | A | A | A | A | 0 | A | A | A |
| 274858 H5N8 Russia A/mute_swan/Kaliningrad/132/2017 2017.118                             | Russia      | muteswan               | Wild-ans      | A | A | D | A | A | 0 | A | A | A |
| 275283 H5N8 Russia A/chicken/Shchyolkovo/47/2017 2017.173                                | Russia      | chicken                | Dom-gal       | A | A | A | A | A | 0 | A | A | A |
| 275287 H5N8 Russia A/chicken/Rostov-on-Don/44/2017 2017.293                              | Russia      | chicken                | Dom-gal       | A | A | A | A | A | 0 | A | A | A |
| 275288 H5N8 Russia A/chicken/Tatarstan/88/2017 2017.348                                  | Russia      | chicken                | Dom-gal       | A | A | A | A | A | 0 | A | A | A |
| 287564 H5N8 Netherlands A/T_Dk/NL-Werkendam/16014159-001/2016 2016.868                   | Netherlands | tuftedduck             | Wild-ans      | A | A | 0 | A | A | A | 0 | A | A |
| 288364 H5N6 Greece A/chicken/Greece/39_2017b/2017 2017.099                               | Greece      | chicken                | Dom-gal       | A | A | A | A | A | 0 | 0 | A | A |
| 288438 H5N8 Korea A/chicken/Korea/Gunsan/2017 2017.419                                   | Korea       | chicken                | Dom-gal       | C | A | E | A | F | 0 | A | A | A |
| 288439 H5N8 Korea A/chicken/Korea/Gimje/2/2017 2017.099                                  | Korea       | chicken                | Dom-gal       | C | A | E | A | F | 0 | A | A | A |
| 295492 H5N8 China A/Anser_cygnoides/Hubei/FW44/2016 2016.948                             | China       | ansercygnoides         | Dom-ans       | C | A | E | A | F | 0 | A | A | A |
| 295493 H5N8 China A/Cygnus_atratus/Hubei/222-0/2016 2016.989                             | China       | cygnusatratus          | Wild-ans      | C | A | B | A | D | 0 | A | A | A |
| 295494 H5N8 China A/Cygnus_atratus/Hubei/HF-1/2016 2016.967                              | China       | cygnusatratus          | Wild-ans      | C | A | B | A | D | 0 | A | A | A |
| 300547 H5N8 Ukraine A/White-fronted_Goose/AN/1-15-12/2016 2016.953                       | Ukraine     | white-frontedgoose     | Wild-ans-long | A | A | A | A | A | 0 | A | A | A |
| 300548 H5N8 Ukraine A/Ruddy_Shelduck/AN/2-14-12/2016 2016.951                            | Ukraine     | ruddyshelduck          | Wild-ans      | A | A | A | A | A | 0 | A | A | A |
| 300745 H5N8 Poland A/wild_duck/Poland/57/2017 2017.071                                   | Poland      | wildduck               | Wild-ans      | A | A | A | A | A | 0 | A | A | A |
| 308802 H5N8 Congo A/duck/Democratic_Republic_of_the_Congo/17RS882-29/2017 2017.367       | Congo       | duck                   | Dom-ans       | C | A | B | A | D | 0 | A | A | A |
| 308804 H5N8 Congo A/duck/Democratic_Republic_of_the_Congo/17RS882-40/2017 2017.362       | Congo       | duck                   | Dom-ans       | C | A | B | A | D | 0 | A | A | A |
| 308806 H5N8 Cameroon A/chicken/Cameroon                                                  | Cameroon    | chicken                | Dom-gal       | C | A | E | A | F | 0 | A | A | A |

|                                                                             |            |                     |               |       |     |     |     |     |     |     |     |     |  |
|-----------------------------------------------------------------------------|------------|---------------------|---------------|-------|-----|-----|-----|-----|-----|-----|-----|-----|--|
| on/17RS1661-1/2017 2017.038                                                 |            |                     |               |       |     |     |     |     |     |     |     |     |  |
| 308807 H5N8 Cameroon A/duck/Cameroon/17RS1661-3/2017 2017.038               | Cameroon   | duck                | Dom-ans       | C     | A   | B   | A   | D   | 0   | A   | A   | A   |  |
| 309198 H5N8 Belgium A/Guinea_fowl/Belgium/6102/2017 2017.449                | Belgium    | guineafowl          | Dom-gal       | A     | A   | A   | A   | A   | 0   | A   | A   | A   |  |
| 257095 H7N1 Bangladesh A/duck/Bangladesh/24692/2015 2015.142                | Bangladesh | duck                | Dom-ans       | X-A+C | X-D | 0   | 0   | 0   | 0   | 0   | 0   | 0   |  |
| 257087 H7N5 Bangladesh A/black-tailed_godwit/Bangladesh/24734/2015 2015.142 | Bangladesh | black-tailed_godwit | Wild-other    | X-A+C | 0   | X-D | 0   | 0   | X-A | 0   | X-A | 0   |  |
| 257066 H4N6 Bangladesh A/duck/Bangladesh/25891/2015 2015.521                | Bangladesh | duck                | Dom-ans       | X-A+C | 0   | X-D | 0   | 0   | 0   | 0   | 0   | 0   |  |
| 257079 H3N6 Bangladesh A/duck/Bangladesh/26948/2015 2015.937                | Bangladesh | duck                | Dom-ans       | X-A+C | 0   | 0   | 0   | 0   | 0   | 0   | 0   | 0   |  |
| 257089 H3N6 Bangladesh A/duck/Bangladesh/26974/2015 2015.940                | Bangladesh | duck                | Dom-ans       | X-A+C | 0   | X-D | 0   | 0   | 0   | 0   | 0   | 0   |  |
| 250236 H1N1 Russia A/gadwall/Chany/315/2016 2016.773                        | Russia     | gadwall             | Wild-ans      | X-A+C | 0   | 0   | 0   | 0   | 0   | 0   | X-A | 0   |  |
| 250237 H1N1 Russia A/mallard/Chany/355/2016 2016.773                        | Russia     | mallard             | Wild-ans      | X-A+C | 0   | 0   | 0   | 0   | 0   | 0   | X-A | 0   |  |
| 240675 H1N1 Russia A/gadwall/Russia_Primorje/394/2016 2016.274              | Russia     | gadwall             | Wild-ans      | X-A+C | X-C | 0   | 0   | X-D | 0   | 0   | 0   | 0   |  |
| 240676 H1N1 Russia A/teal/Russia_Primorje/390/2016 2016.274                 | Russia     | teal                | Wild-ans      | X-A+C | X-C | 0   | 0   | X-D | 0   | 0   | 0   | 0   |  |
| 224728 H5N8 China A/Bar-headed_Goose/Qinghai/BTY12-LU/2016 2016.362         | China      | Bar-headed_Goose    | Wild-ans      | X-A+C | X-A | X-B | X-A | X-D | 0   | X-A | X-A | X-A |  |
| 224748 H5N8 China A/Brown-headed_Gull/Qinghai/ZT05-K/2016 2016.364          | China      | Brown-headed_Gull   | Wild-other    | X-A+C | X-A | X-B | X-A | X-D | 0   | X-A | X-A | X-A |  |
| 224720 H5N8 China A/Bar-headed_Goose/Qinghai/BTY8-LU/2016 2016.353          | China      | Bar-headed_Goose    | Wild-ans      | X-A+C | X-A | X-B | X-A | X-D | 0   | X-A | X-A | X-A |  |
| 224713 H5N8 China A/Bar-headed_Goose/Qinghai/BTY5-B/2016 2016.359           | China      | Bar-headed_Goose    | Wild-ans      | X-A+C | X-A | X-B | X-A | X-D | 0   | X-A | X-A | X-A |  |
| 224718 H5N8 China A/Bar-headed_Goose/Qinghai/BTY7-LU2/2016 2016.356         | China      | Bar-headed_Goose    | Wild-ans      | X-A+C | X-A | X-B | X-A | X-D | 0   | X-A | X-A | X-A |  |
| 224746 H5N8 China A/Brown-headed_Gull/Qinghai/ZT04-B/2016 2016.356          | China      | Brown-headed_Gull   | Wild-other    | X-A+C | X-A | X-B | X-A | X-D | 0   | X-A | X-A | X-A |  |
| 224736 H5N8 China A/Bar-headed_Goose/Qinghai/BTY16-LU/2016 2016.364         | China      | Bar-headed_Goose    | Wild-ans      | X-A+C | X-A | X-B | X-A | X-D | 0   | X-A | X-A | X-A |  |
| 224745 H5N8 China A/Brown-headed_Gull/Qinghai/ZT03-LU/2016 2016.359         | China      | Brown-headed_Gull   | Wild-other    | X-A+C | X-A | X-B | X-A | X-D | 0   | X-A | 0   | X-A |  |
| 224741 H5N8 China A/Bar-headed_Goose/Qinghai/BTY18-MU/2016 2016.367         | China      | Bar-headed_Goose    | Wild-ans      | X-A+C | X-A | X-B | 0   | X-D | 0   | X-A | X-A | X-A |  |
| 254725 H5N8 Korea A/chicken/Korea/H903/2017 2017.104                        | Korea      | chicken             | Dom-gal       | X-A+C | X-A | X-E | X-A | X-F | 0   | X-A | X-A | X-A |  |
| 240678 H5N8 Russia A/domestic_duck/Siberia/50K/2016 2016.773                | Russia     | domestic_duck       | Dom-ans       | X-A+C | 0   | X-E | X-A | X-F | 0   | X-A | X-A | X-A |  |
| 262059 H5N8 Germany A/greylag_goose/Germany-NI/AR703-L02138/2017 2017.066   | Germany    | greylaggoose        | Wild-ans-long | B     | D   | B   | A   | B   | 0   | A   | A   | A   |  |
| 240102 H5N8 Poland A/domestic_goose/Poland/33/2016 2016.918                 | Poland     | domesticgoose       | Dom-ans       | B     | D   | B   | A   | B   | 0   | A   | A   | A   |  |
| 256308 H5N8 Italy A/chicken/Italy/17VIR1751-3/2017 2017.156                 | Italy      | chicken             | Dom-gal       | B     | A   | B   | A   | B   | 0   | A   | A   | A   |  |
| 271710 H5N8 Hungary A/Mulard_duck/Hungary/60369/2016 2016.910               | Hungary    | mulardduck          | Dom-ans       | B     | A   | B   | A   | B   | 0   | A   | A   | A   |  |
| 271713 H5N8 Hungary A/Goose/Hungary/64909/2016 2016.951                     | Hungary    | goose               | Dom-ans       | B     | A   | B   | A   | B   | 0   | A   | A   | A   |  |
| 255196 H5N8 Hungary A/Greylag_goose/Hungary/1941/2017 2017.047              | Hungary    | greylaggoose        | Wild-ans-long | B     | A   | B   | A   | B   | 0   | A   | A   | A   |  |
| 255190 H5N8 Hungary A/Mute_swan/Hungary/119/2017 2017.003                   | Hungary    | muteswan            | Wild-ans      | B     | A   | B   | A   | B   | 0   | A   | A   | A   |  |
| 271706 H5N8 Hungary A/Goose/Hungary/17051/2017 2017.293                     | Hungary    | goose               | Dom-ans       | B     | A   | B   | A   | B   | 0   | A   | A   | A   |  |
| 271705 H5N8 Hungary A/Goose/Hungary/15729/2017 2017.263                     | Hungary    | goose               | Dom-ans       | B     | A   | B   | A   | B   | 0   | A   | A   | A   |  |
| 255191 H5N8 Hungary A/Harris_Hawk/Hungary/120/2017 2017.003                 | Hungary    | harrishawk          | Wild-other    | B     | A   | B   | A   | B   | 0   | A   | A   | A   |  |
| 239420 H5N8 Hungary A/duck/Hungary/60441/2016 2016.918                      | Hungary    | duck                | Dom-ans       | B     | A   | B   | A   | B   | 0   | A   | A   | A   |  |
| 271714 H5N8 Hungary A/Mulard_duck/Hungary/59163/2016 2016.896               | Hungary    | mulardduck          | Dom-ans       | B     | A   | B   | A   | B   | 0   | A   | A   | A   |  |
| 255216 H5N8 Hungary A/Mallard/Hungary/5821/2017 2017.118                    | Hungary    | mallard             | Wild-ans      | B     | A   | B   | A   | B   | 0   | A   | A   | A   |  |
| 237964 H5N8 Hungary A/duck/Hungary/54494/2016 2016.852                      | Hungary    | duck                | Dom-ans       | B     | A   | B   | A   | B   | 0   | A   | A   | A   |  |
| 256453 H5N8 Hungary A/Duck/Hungary/54738/2016 2016.855                      | Hungary    | duck                | Dom-ans       | B     | A   | B   | A   | B   | 0   | A   | A   | A   |  |
| 271709 H5N8 Hungary A/Goose/Hungary/59763/2016 2016.904                     | Hungary    | goose               | Dom-ans       | B     | A   | B   | A   | B   | 0   | A   | A   | A   |  |
| 237965 H5N8 Hungary A/goose/Hungary/55128/2016 2016.860                     | Hungary    | goose               | Dom-ans       | B     | A   | B   | A   | B   | 0   | A   | A   | A   |  |

|                                                                                               |                       |                    |               |   |   |   |   |   |   |   |   |   |
|-----------------------------------------------------------------------------------------------|-----------------------|--------------------|---------------|---|---|---|---|---|---|---|---|---|
| 255200 H5N8 Hungary A Mute_swan/Hungary/2508/2017 2017.058                                    | Hungary               | mutesswan          | Wild-ans      | B | A | B | A | B | 0 | A | A | A |
| 255198 H5N8 Hungary A/Turkey/Hungary/2030/2017 2017.047                                       | Hungary               | turkey             | Dom-gal       | B | A | B | A | B | 0 | A | A | A |
| 237731 H5N8 Hungary A/domestic_turkey/Hungary/53433/2016 2016.836                             | Hungary               | domesticturkey     | Dom-gal       | B | A | B | A | B | 0 | A | A | A |
| 256460 H5N8 Hungary A/Turkey/Hungary/53136/2016 2016.833                                      | Hungary               | turkey             | Dom-gal       | B | A | B | A | B | 0 | A | A | A |
| 237730 H5N8 Hungary A/mute_swan/Hungary/51049/2016 2016.797                                   | Hungary               | mutesswan          | Wild-ans      | B | A | B | A | B | 0 | A | A | A |
| 255214 H5N8 Hungary A/Chicken/Hungary/1751/2017 2017.044                                      | Hungary               | chicken            | Dom-gal       | B | A | B | A | B | 0 | A | A | A |
| 255933 H5N8 Hungary A/Cormorant/Hungary/6102/2017 2017.123                                    | Hungary               | cormorant          | Wild-other    | B | A | B | A | B | 0 | A | A | A |
| 266538 H5N8 Belgium A/Cygnus_olor/Belgium/1567/2017 2017.140                                  | Belgium               | cygnusolor         | Wild-ans      | B | A | B | A | B | 0 | A | A | A |
| 249682 H5N8 Germany A/domestic_goose/Germany-BY/R677/2017 2017.066                            | Germany               | domesticgoose      | Dom-ans       | B | A | B | A | B | 0 | A | A | A |
| 240104 H5N8 Poland A/chicken/Poland/79A/2016 2016.959                                         | Poland                | chicken            | Dom-gal       | B | A | B | A | B | 0 | A | A | A |
| 240012 H5N8 France A/duck/France/161108h/2016 2016.907                                        | France                | duck               | Dom-ans       | B | A | B | A | B | 0 | A | A | A |
| 255267 H5N8 France A/duck/France/161587/2016 2016.995                                         | France                | duck               | Dom-ans       | B | A | B | A | B | 0 | A | A | A |
| 255629 H5N8 France A/duck/France/170437b/2016 2017.044                                        | France                | duck               | Dom-ans       | B | A | B | A | B | 0 | A | A | A |
| 256306 H5N8 Italy A/turkey/Italy/17VIR1574-1/2017 2017.140                                    | Italy                 | turkey             | Dom-gal       | B | A | B | A | B | 0 | A | A | A |
| 255186 H5N8 Italy A/turkey/Italy/17VIR1338-3/2017 2017.121                                    | Italy                 | turkey             | Dom-gal       | B | A | B | A | B | 0 | A | A | A |
| 254814 H5N8 Hungary A/mallard/Hungary/57857/2016 2016.888                                     | Hungary               | mallard            | Wild-ans      | B | A | B | A | B | 0 | A | A | A |
| 255193 H5N8 Hungary A/Duck/Hungary/984/2017 2017.027                                          | Hungary               | duck               | Dom-ans       | B | A | B | A | B | 0 | A | A | A |
| 255205 H5N8 Hungary A/Chicken/Hungary/2496/2017 2017.063                                      | Hungary               | chicken            | Dom-gal       | B | A | B | A | B | 0 | A | A | A |
| 255197 H5N8 Hungary A/Mute_swan/Hungary/1955/2017 2017.047                                    | Hungary               | mutesswan          | Wild-ans      | B | A | B | A | B | 0 | A | A | A |
| 239419 H5N8 Hungary A/chicken/Hungary/59048/2016 2016.899                                     | Hungary               | chicken            | Dom-gal       | B | A | B | A | B | 0 | A | A | A |
| 255398 H5N8 Hungary A/Goose/Hungary/59712/2016 2016.901                                       | Hungary               | goose              | Dom-ans       | B | A | B | A | B | 0 | A | A | A |
| 255936 H5N8 Hungary A/Pheasant/Hungary/6553/2017 2017.126                                     | Hungary               | pheasant           | Dom-gal       | B | A | B | A | B | 0 | A | A | A |
| 255937 H5N8 Hungary A/Pheasant/Hungary/7685/2017 2017.148                                     | Hungary               | pheasant           | Dom-gal       | B | A | B | A | B | 0 | A | A | A |
| 238196 H5N8 Croatia A/mute_swan/Croatia/70/2016 2016.827                                      | Croatia               | mutesswan          | Wild-ans      | B | A | B | A | B | 0 | A | A | A |
| 256305 H5N8 Italy A/shelduck/Italy/17VIR1572-24/2017 2017.005                                 | Italy                 | shelduck           | Wild-ans      | B | A | B | A | B | 0 | A | A | A |
| 255938 H5N8 Hungary A/Rook/Hungary/4975/2017 2017.104                                         | Hungary               | rook               | Wild-other    | B | A | B | A | B | 0 | A | A | A |
| 255213 H5N8 Hungary A/GuineaFowl/Hungary/596/2017 2017.014                                    | Hungary               | guineafowl         | Dom-gal       | B | A | B | A | B | 0 | A | A | A |
| 261634 H5N8 Republic_of_Macedonia A/chicken/Republic_of_Macedonia/AR1167-L02131/2017 2017.038 | Republic_of_Macedonia | chicken            | Dom-gal       | B | A | B | A | B | 0 | A | A | A |
| 255219 H5N8 Hungary A/White_froned_goose/Hungary/801/2017 2017.022                            | Hungary               | white-frontedgoose | Wild-ans-long | B | A | B | A | B | 0 | A | A | A |
| 255207 H5N8 Hungary A/Mute_swan/Hungary/5316/2017 2017.107                                    | Hungary               | mutesswan          | Wild-ans      | B | A | B | A | B | 0 | A | A | A |
| 255208 H5N8 Hungary A/Common_buzzard/Hungary/7061/2017 2017.140                               | Hungary               | commonbuzzard      | Wild-other    | B | A | B | A | B | 0 | A | A | A |
| 255211 H5N8 Hungary A/Harris_hawk/Hungary/2762b/2017 2017.063                                 | Hungary               | harrishawk         | Wild-other    | B | A | B | A | B | 0 | A | A | A |
| 250885 H5N8 Czechia A/mute_swan/Czech_Republic/54-17_2/2017 2017.003                          | Czechia               | mutesswan          | Wild-ans      | B | A | B | A | B | 0 | A | A | A |
| 250887 H5N8 Czechia A/chicken/Czech_Republic/55-17_1/2017 2017.003                            | Czechia               | chicken            | Dom-gal       | B | A | B | A | B | 0 | A | A | A |
| 261687 H5N8 Germany A/black_swan/Germany-BW/R1364/2017 2017.115                               | Germany               | blackswan          | Wild-ans      | B | A | B | A | B | 0 | A | A | A |
| 268947 H5N8 Czechia A/mallard/Czech_Republic/1219-17_1/2017 2017.066                          | Czechia               | mallard            | Wild-ans      | B | A | B | A | B | 0 | A | A | A |
| 297388 H5N8 Macedonia A/chicken/Republic_of_Macedonia/466/2017 2017.074                       | Macedonia             | chicken            | Dom-gal       | B | A | B | A | B | 0 | A | A | A |
| 300686 H5N8 Poland A/turkey/Poland/63/2016 2016.945                                           | Poland                | turkey             | Dom-gal       | B | D | B | A | B | 0 | A | A | A |
| 300687 H5N8 Poland A/chicken/Poland/34/2017 2017.027                                          | Poland                | chicken            | Dom-gal       | B | D | B | A | B | 0 | A | A | A |
| 300693 H5N8 Poland A/domestic_duck/Poland/47/2017 2017.041                                    | Poland                | domesticduck       | Dom-ans       | B | A | B | A | B | 0 | A | A | A |
| 300698 H5N8 Poland A/turkey/Poland/54/2017 2017.047                                           | Poland                | turkey             | Dom-gal       | B | A | B | A | B | 0 | A | A | A |
| 300699 H5N8 Poland A/domestic_goose/Poland/69/2017 2017.071                                   | Poland                | domesticgoose      | Dom-ans       | B | D | B | A | B | 0 | A | A | A |
| 309194 H5N8 Belgium A/Anas_platyrhynchos/Belgium/1899/2017 2017.156                           | Belgium               | anasplatyrhynchos  | Wild-ans      | B | A | B | A | B | 0 | A | A | A |
| 309195 H5N8 Belgium A/Cygnus_olor/Belgium/1899/2017 2017.156                                  | Belgium               | cygnusolor         | Wild-ans      | B | D | B | A | B | 0 | A | A | A |

|                                                                            |             |                   |               |     |     |     |     |     |   |   |     |   |
|----------------------------------------------------------------------------|-------------|-------------------|---------------|-----|-----|-----|-----|-----|---|---|-----|---|
| um/2967/2017/2017.216                                                      |             |                   |               |     |     |     |     |     |   |   |     |   |
| 309196 H5N8 Belgium A/Buteo_buteo/Belgium/3022/2017/2017.222               | Belgium     | buteobuteo        | Wild-other    | B   | A   | B   | A   | B   | 0 | A | A   | A |
| 256785 H10N1 Bangladesh A/duck/Bangladesh/24035/2014/2014.992              | Bangladesh  | duck              | Dom-ans       | X-B | X-D | X-D | 0   | 0   | 0 | 0 | 0   | 0 |
| 257411 H5N5 Georgia A/mallard/Republic_of_Georgia/1/2016/2016.945          | Georgia     | mallard           | Wild-ans      | D   | C   | B   | A   | E   | A | 0 | A   | A |
| 256301 H5N5 Russia A/environment/Kamchatka/18/2016/2016.748                | Russia      | larusschistisagus | Wild-other    | D   | C   | B   | A   | E   | A | 0 | A   | A |
| 243698 H5N5 Croatia A/mute_swan/Croatia/42/2017/2017.052                   | Croatia     | muteswan          | Wild-ans      | D   | C   | B   | A   | E   | A | 0 | A   | A |
| 240101 H5N5 Croatia A/mute_swan/Croatia/102/2016/2016.986                  | Croatia     | muteswan          | Wild-ans      | D   | C   | B   | A   | E   | A | 0 | A   | A |
| 262056 H5N5 Germany A/greylag_goose/Germany-NIAR11353-L02142/2016/2016.986 | Germany     | greylaggoose      | Wild-ans-long | D   | C   | B   | A   | E   | A | 0 | A   | A |
| 261332 H5N5 Croatia A/chicken/Croatia/104/2017/2017.178                    | Croatia     | chicken           | Dom-gal       | D   | C   | B   | A   | E   | A | 0 | A   | A |
| 255189 H5N5 Italy A/gadwall/Italy/17VIR133-2/2017/2017.025                 | Italy       | gadwall           | Wild-ans      | D   | C   | B   | A   | E   | A | 0 | A   | A |
| 243085 H5N5 Italy A/wigeon/Italy/16VIR9616-3/2016/2016.992                 | Italy       | wigeon            | Wild-ans-long | D   | C   | B   | A   | E   | A | 0 | A   | A |
| 255917 H5N5 Poland A/mute_swan/Poland/64/2017/2017.082                     | Poland      | muteswan          | Wild-ans      | D   | C   | B   | A   | E   | A | 0 | 0   | A |
| 256462 H5N5 Hungary A/Mute_swan/Hungary/5879/2017/2017.121                 | Hungary     | muteswan          | Wild-ans      | D   | C   | B   | A   | E   | A | 0 | A   | A |
| 240893 H5N5 Germany A/swan/Germany-SN/R10645/2016/2016.948                 | Germany     | swan              | Wild-ans      | D   | C   | B   | A   | E   | A | 0 | A   | A |
| 259074 H5N5 Germany A/common_buzzard/Germany-SN/R1117/2017/2017.099        | Germany     | commonbuzzard     | Wild-other    | D   | C   | B   | A   | E   | A | 0 | A   | A |
| 259525 H5N5 Germany A/egret/Germany-SH/R1459/2017/2017.121                 | Germany     | egret             | Wild-other    | D   | 0   | B   | A   | 0   | 0 | 0 | A   | A |
| 260058 H5N5 Germany A/grey_heron/Germany-SN/R572/2017/2017.058             | Germany     | greyheron         | Wild-other    | D   | C   | B   | A   | E   | A | 0 | A   | A |
| 260059 H5N5 Germany A/cormorant/Germany-SH/R896/2017/2017.079              | Germany     | cormorant         | Wild-other    | D   | 0   | B   | A   | 0   | A | 0 | A   | A |
| 287565 H5N5 Netherlands A/M_Swan/NL-Groningen/16015826-001/2016/2016.948   | Netherlands | muteswan          | Wild-ans      | D   | C   | B   | A   | E   | A | 0 | A   | A |
| 300746 H5N5 Poland A/swan/Poland/81/2017/2017.088                          | Poland      | swan              | Wild-ans      | D   | C   | B   | A   | E   | 0 | 0 | 0   | A |
| 267243 H3N6 Netherlands A/barnacle_goose/Netherlands/2/2014/2014.953       | Netherlands | barnacle_goose    | Wild-ans      | X-D | 0   | 0   | 0   | 0   | 0 | 0 | 0   | 0 |
| 206308 H10N3 Mongolia A/duck/Mongolia/326/2015/2015.619                    | Mongolia    | duck              | Dom-ans       | X-D | 0   | 0   | 0   | 0   | 0 | 0 | 0   | 0 |
| 181451 H10N3 China A/duck/Jiangxi/15867/2013/2013.474                      | China       | duck              | Dom-ans       | 0   | X-A | 0   | 0   | 0   | 0 | 0 | 0   | 0 |
| 257070 H3N6 Bangladesh A/duck/Bangladesh/26918/2015/2015.937               | Bangladesh  | duck              | Dom-ans       | 0   | X-A | 0   | 0   | 0   | 0 | 0 | 0   | 0 |
| 209127 H3N6 Mongolia A/duck/Mongolia/405/2015/2015.663                     | Mongolia    | duck              | Dom-ans       | 0   | X-A | 0   | 0   | 0   | 0 | 0 | 0   | 0 |
| 209114 H4N6 Mongolia A/duck/Mongolia/118/2015/2015.660                     | Mongolia    | duck              | Dom-ans       | 0   | X-A | 0   | 0   | 0   | 0 | 0 | 0   | 0 |
| 267352 H6N2 Netherlands A/mallard_duck/Netherlands/9/2014/2014.822         | Netherlands | mallard_duck      | Wild-ans      | 0   | X-A | 0   | 0   | 0   | 0 | 0 | 0   | 0 |
| 209131 H4N6 Mongolia A/duck/Mongolia/543/2015/2015.663                     | Mongolia    | duck              | Dom-ans       | 0   | X-A | 0   | 0   | 0   | 0 | 0 | X-A | 0 |
| 205121 H5N6 China A/duck/Taizhou/TZYG12/2015/2015.038                      | China       | duck              | Dom-ans       | 0   | X-  | X-  | X-A | 0   | 0 | 0 | 0   | 0 |
| 205119 H5N6 China A/duck/Wenzhou/YHQ122/2014/2014.038                      | China       | duck              | Dom-ans       | 0   | X-  | X-  | X-A | 0   | 0 | 0 | 0   | 0 |
| 206307 H10N3 Mongolia A/duck/Mongolia/245/2015/2015.619                    | Mongolia    | duck              | Dom-ans       | 0   | X-C | 0   | 0   | 0   | 0 | 0 | 0   | 0 |
| 209129 H1N1 Mongolia A/duck/Mongolia/520/2015/2015.663                     | Mongolia    | duck              | Dom-ans       | 0   | X-C | 0   | 0   | 0   | 0 | 0 | 0   | 0 |
| 206696 H10N7 Mongolia A/duck/Mongolia/709/2015/2015.663                    | Mongolia    | duck              | Dom-ans       | 0   | X-C | 0   | 0   | X-D | 0 | 0 | X-A | 0 |
| 252819 H6N2 China A/duck/Hubei/ZYSYG8/2015/2015.888                        | China       | duck              | Dom-ans       | 0   | X-C | 0   | 0   | 0   | 0 | 0 | 0   | 0 |
| 243666 H11N9 Netherlands A/mallard_duck/Netherlands/26/2011/2011.773       | Netherlands | mallard_duck      | Wild-ans      | 0   | X-C | 0   | 0   | 0   | 0 | 0 | 0   | 0 |
| 257092 H6N1 Bangladesh A/duck/Bangladesh/25767/2015/2015.523               | Bangladesh  | duck              | Dom-ans       | 0   | X-D | 0   | 0   | X-E | 0 | 0 | X-A | 0 |
| 240672 H3N8 Russia A/shoveler/Chany/82K/2014/2014.690                      | Russia      | shoveler          | Wild-ans      | 0   | X-D | 0   | 0   | 0   | 0 | 0 | 0   | 0 |
| 252465 H6N2 India A/duck/India/11CL01/2014/2014.871                        | India       | duck              | Dom-ans       | 0   | X-D | 0   | 0   | 0   | 0 | 0 | 0   | 0 |
| 257048 H7N9 Bangladesh A/duck/Bangladesh/26980/2015/2015.940               | Bangladesh  | duck              | Dom-ans       | 0   | X-D | 0   | 0   | 0   | 0 | 0 | 0   | 0 |
| 207030 H3N8 Mongolia A/duck/Mongolia/83/2015/2015.660                      | Mongolia    | duck              | Dom-ans       | 0   | X-D | 0   | 0   | 0   | 0 | 0 | 0   | 0 |
| 207029 H3N8 Mongolia A/duck/Mongolia/20/2015/2015.658                      | Mongolia    | duck              | Dom-ans       | 0   | X-D | 0   | 0   | 0   | 0 | 0 | 0   | 0 |
| 189700 H6N2 Georgia A/mallard/Republic_of_Georgia/13/2011/2011.901         | Georgia     | mallard           | Wild-ans      | 0   | 0   | X-A | 0   | 0   | 0 | 0 | 0   | 0 |
| 257053 H5N1 Bangladesh A/duck/Bangladesh/25845/2015/2015.523               | Bangladesh  | duck              | Dom-ans       | 0   | 0   | X-B | 0   | 0   | 0 | 0 | 0   | 0 |
| 257052 H5N1 Bangladesh A/duck/Bangladesh/28250/2016/2016.093               | Bangladesh  | duck              | Dom-ans       | 0   | 0   | X-B | 0   | 0   | 0 | 0 | 0   | 0 |
| 257097 H5N1 Bangladesh A/duck/Bangladesh/28250/2016/2016.093               | Bangladesh  | duck              | Dom-ans       | 0   | 0   | X-B | 0   | 0   | 0 | 0 | 0   | 0 |



|                                                                             |             |               |               |   |   |     |     |       |   |   |     |     |
|-----------------------------------------------------------------------------|-------------|---------------|---------------|---|---|-----|-----|-------|---|---|-----|-----|
| sh/27892/2015 2015.975                                                      |             |               |               |   |   |     |     |       |   |   |     |     |
| 257073 H5N1 Bangladesh A/duck/Bangladesh/28389/2016 2016.162                | Bangladesh  | duck          | Dom-ans       | 0 | 0 | X-B | 0   | 0     | 0 | 0 | 0   | 0   |
| 257088 H5N1 Bangladesh A/duck/Bangladesh/26182/2015 2015.696                | Bangladesh  | duck          | Dom-ans       | 0 | 0 | X-B | 0   | 0     | 0 | 0 | 0   | 0   |
| 257056 H5N1 Bangladesh A/duck/Bangladesh/25887/2015 2015.521                | Bangladesh  | duck          | Dom-ans       | 0 | 0 | X-B | 0   | 0     | 0 | 0 | 0   | 0   |
| 257046 H5N1 Bangladesh A/duck/Bangladesh/25683/2015 2015.482                | Bangladesh  | duck          | Dom-ans       | 0 | 0 | X-B | 0   | 0     | 0 | 0 | 0   | 0   |
| 206694 H10N3 Mongolia A/duck/Mongolia/518/2015 2015.663                     | Mongolia    | duck          | Dom-ans       | 0 | 0 | X-D | 0   | 0     | 0 | 0 | 0   | 0   |
| 209111 H3N8 Mongolia A/duck/Mongolia/30/2015 2015.658                       | Mongolia    | duck          | Dom-ans       | 0 | 0 | X-D | 0   | 0     | 0 | 0 | 0   | 0   |
| 209118 H3N8 Mongolia A/duck/Mongolia/167/2015 2015.660                      | Mongolia    | duck          | Dom-ans       | 0 | 0 | X-D | 0   | 0     | 0 | 0 | 0   | 0   |
| 209124 H3N8 Mongolia A/duck/Mongolia/208/2015 2015.663                      | Mongolia    | duck          | Dom-ans       | 0 | 0 | X-D | 0   | 0     | 0 | 0 | 0   | 0   |
| 209132 H2N3 Mongolia A/duck/Mongolia/655/2015 2015.663                      | Mongolia    | duck          | Dom-ans       | 0 | 0 | X-D | 0   | 0     | 0 | 0 | 0   | 0   |
| 240673 H5N3 Russia A/mallard/Chany/260U/2014 2014.690                       | Russia      | mallard       | Wild-ans      | 0 | 0 | X-D | 0   | 0     | 0 | 0 | 0   | 0   |
| 240680 H5N3 Russia A/mallard/Chany/126K/2014 2014.693                       | Russia      | mallard       | Wild-ans      | 0 | 0 | X-D | 0   | 0     | 0 | 0 | X-A | 0   |
| 240681 H8N4 Russia A/mallard/Chany/126K-2/2014 2014.693                     | Russia      | mallard       | Wild-ans      | 0 | 0 | X-D | 0   | 0     | 0 | 0 | 0   | 0   |
| 250232 H3N8 Russia A/teal/Chany/135/2016 2016.690                           | Russia      | teal          | Wild-ans      | 0 | 0 | X-D | 0   | X-A+B | 0 | 0 | X-A | 0   |
| 250233 H3N8 Russia A/mallard/Chany/185/2016 2016.690                        | Russia      | mallard       | Wild-ans      | 0 | 0 | X-D | 0   | X-A+B | 0 | 0 | X-A | 0   |
| 250234 H3N8 Russia A/pintail/Chany/198/2016 2016.690                        | Russia      | pintail       | Wild-ans      | 0 | 0 | X-D | 0   | X-A+B | 0 | 0 | X-A | 0   |
| 250238 H6N8 Russia A/domestic_duck/Siberia/49_feather/2016 2016.500         | Russia      | domestic_duck | Dom-ans       | 0 | 0 | X-D | 0   | X-E   | 0 | 0 | X-A | 0   |
| 257067 H3N6 Bangladesh A/duck/Bangladesh/26920/2015 2015.937                | Bangladesh  | duck          | Dom-ans       | 0 | 0 | X-D | 0   | 0     | 0 | 0 | 0   | 0   |
| 257071 H7N1 Bangladesh A/duck/Bangladesh/24705/2015 2015.142                | Bangladesh  | duck          | Dom-ans       | 0 | 0 | X-D | 0   | 0     | 0 | 0 | 0   | 0   |
| 257076 H15N9 Bangladesh A/duck/Bangladesh/24697/2015 2015.142               | Bangladesh  | duck          | Dom-ans       | 0 | 0 | X-D | 0   | 0     | 0 | 0 | X-A | 0   |
| 205833 H5N1 U.K. A/chicken/Scotland/532/2016 2016.022                       | U.K.        | chicken       | Dom-gal       | 0 | 0 | X-E | 0   | X-E   | 0 | 0 | 0   | 0   |
| 224581 H7N9 Netherlands A/chicken/Netherlands/16007311-037041/2016 2016.433 | Netherlands | chicken       | Dom-gal       | 0 | 0 | X-E | 0   | 0     | 0 | 0 | X-A | 0   |
| 224753 H10N7 Netherlands A/chicken/Netherlands/15007212/15 2015.323         | Netherlands | chicken       | Dom-gal       | 0 | 0 | X-E | 0   | 0     | 0 | 0 | 0   | 0   |
| 267238 H12N3 Netherlands A/Bewick_swan/Netherlands/1/2014 2014.915          | Netherlands | Bewick_swan   | Wild-ans      | 0 | 0 | X-E | 0   | X-F   | 0 | 0 | 0   | 0   |
| 180649 H5N1 China A/goose/Shandong/k1201/2009 2009.940                      | China       | goose         | Dom-ans       | 0 | 0 | 0   | X-A | 0     | 0 | 0 | 0   | 0   |
| 250920 H5N5 Czechia A/mute_swan/Czech_Republic/2031-17/2017 2017.107        | Czechia     | muteswan      | Wild-ans      | 0 | 0 | 0   | A   | 0     | A | 0 | A   | 0   |
| 243049 H5N5 Germany A/turkey/Germany-SH/R425/2017 2017.058                  | Germany     | turkey        | Dom-gal       | 0 | 0 | 0   | A   | 0     | A | 0 | A   | A   |
| 139385 H5N8 China A/duck/Jiangsu/k1203/2010 2010.926                        | China       | duck          | Dom-ans       | 0 | 0 | 0   | X-A | 0     | 0 | 0 | 0   | 0   |
| 208828 H5N8 China A/duck/Eastern_China/L1021/2012 2012.803                  | China       | duck          | Dom-ans       | 0 | 0 | 0   | X-A | 0     | 0 | 0 | 0   | 0   |
| 206490 H5N8 China A/goose/Jiangsu/QD5/2014 2014.156                         | China       | goose         | Dom-ans       | 0 | 0 | 0   | X-A | 0     | 0 | 0 | 0   | 0   |
| 222132 H5N8 China A/duck/Eastern_China/JY/2014 2014.008                     | China       | duck          | Dom-ans       | 0 | 0 | 0   | X-A | 0     | 0 | 0 | 0   | 0   |
| 206492 H5N8 China A/goose/Yangzhou/0420/2014 2014.299                       | China       | goose         | Dom-ans       | 0 | 0 | 0   | X-A | 0     | 0 | 0 | 0   | X-A |
| 206491 H5N8 China A/goose/Shandong/WFSG1/2014 2014.274                      | China       | goose         | Dom-ans       | 0 | 0 | 0   | X-A | 0     | 0 | 0 | 0   | X-A |
| 196592 H5N8 China A/goose/Jiangsu/WX202/2014 2014.123                       | China       | goose         | Dom-ans       | 0 | 0 | 0   | X-A | 0     | 0 | 0 | 0   | 0   |
| 162301 H5N8 China A/duck/Zhejiang/6D18/2013 2013.951                        | China       | duck          | Dom-ans       | 0 | 0 | 0   | X-A | 0     | 0 | 0 | 0   | 0   |
| 208840 H5N8 China A/goose/Eastern_China/S0408/2014 2014.266                 | China       | goose         | Dom-ans       | 0 | 0 | 0   | X-A | 0     | 0 | 0 | 0   | 0   |
| 171695 H5N8 Korea A/Baikal_teal/Korea/H52/2014 2014.052                     | Korea       | Baikal_teal   | Wild-ans-long | 0 | 0 | 0   | X-A | 0     | 0 | 0 | 0   | 0   |
| 157609 H5N8 Korea A/breeder_duck/Korea/Gochang1/2014 2014.041               | Korea       | breeder_duck  | Dom-ans       | 0 | 0 | 0   | X-A | 0     | 0 | 0 | 0   | 0   |
| 208832 H5N8 China A/duck/Eastern_China/S1210/2013 2013.940                  | China       | duck          | Dom-ans       | 0 | 0 | 0   | X-A | 0     | 0 | 0 | 0   | 0   |
| 162300 H5N8 China A/duck/Zhejiang/W24/2013 2013.868                         | China       | duck          | Dom-ans       | 0 | 0 | 0   | X-A | 0     | 0 | 0 | 0   | 0   |
| 270371 H5N8 China A/falcated_duck/Shanghai/PD1121-27/2013 2013.888          | China       | falcated_duck | Wild-ans      | 0 | 0 | 0   | X-A | 0     | 0 | 0 | 0   | 0   |
| 203751 H5N8 China A/duck/Zhejiang/925169/2014 2014.732                      | China       | duck          | Dom-ans       | 0 | 0 | 0   | X-A | 0     | 0 | 0 | 0   | 0   |
| 222134 H5N8 China A/goose/Eastern_China/CZ/2013 2013.860                    | China       | goose         | Dom-ans       | 0 | 0 | 0   | X-A | 0     | 0 | 0 | 0   | 0   |
| 270369 H5N8 China A/mallard/Shanghai/S-H-9/2013 2013.866                    | China       | mallard       | Wild-ans      | 0 | 0 | 0   | X-A | 0     | 0 | 0 | 0   | 0   |
| 156815 H5N8 China A/mallard_duck/Shang                                      | China       | mallard_duck  | Wild-ans      | 0 | 0 | 0   | X-A | 0     | 0 | 0 | 0   | 0   |

|                                                                       |             |                   |               |   |   |   |     |     |     |     |     |     |   |
|-----------------------------------------------------------------------|-------------|-------------------|---------------|---|---|---|-----|-----|-----|-----|-----|-----|---|
| hai/SH-9/2013 2013.879                                                |             |                   |               |   |   |   |     |     |     |     |     |     |   |
| 270363 H5N8 China A/common_teal/Shang hai/PD1118-1/2013 2013.879      | China       | common_teal       | Wild-ans-long | 0 | 0 | 0 | X-A | 0   | 0   | 0   | 0   | 0   | 0 |
| 270368 H5N8 China A/common_teal/Shang hai/PD1121-18/2013 2013.888     | China       | common_teal       | Wild-ans-long | 0 | 0 | 0 | X-A | 0   | 0   | 0   | 0   | 0   | 0 |
| 270367 H5N8 China A/common_teal/Shang hai/PD1202-9/2013 2013.918      | China       | common_teal       | Wild-ans-long | 0 | 0 | 0 | X-A | 0   | 0   | 0   | 0   | 0   | 0 |
| 270372 H5N8 China A/spot-billed_duck/Shanghai/PD1202-3/2013 2013.918  | China       | spot-billed_duck  | Wild-ans      | 0 | 0 | 0 | X-A | 0   | 0   | 0   | 0   | 0   | 0 |
| 203753 H5N8 China A/goose/Zhejiang/925104/2014 2014.732               | China       | goose             | Dom-ans       | 0 | 0 | 0 | X-A | 0   | 0   | X-A | 0   | 0   | 0 |
| 208841 H5N8 China A/duck/Eastern_China/S1109/2014 2014.855            | China       | duck              | Dom-ans       | 0 | 0 | 0 | X-A | 0   | 0   | X-A | 0   | X-A | 0 |
| 240109 H5N8 Russia A/chicken/Kalmykia/2661/2016 2016.893              | Russia      | chicken           | Dom-gal       | 0 | 0 | 0 | X-A | 0   | 0   | X-A | 0   | 0   | 0 |
| 239802 H5N8 Egypt A/Common-coot/Egypt/CA285/2016 2016.901             | Egypt       | Common-coot       | Wild-other    | 0 | 0 | 0 | X-A | 0   | 0   | X-A | 0   | 0   | 0 |
| 202558 H5N8 China A/duck/Liaoning/S1001/2014 2014.337                 | China       | duck              | Dom-ans       | 0 | 0 | 0 | X-A | 0   | 0   | 0   | 0   | 0   | 0 |
| 208835 H5N8 China A/duck/Eastern_China/S0215/2014 2014.123            | China       | duck              | Dom-ans       | 0 | 0 | 0 | X-A | 0   | 0   | X-A | 0   | 0   | 0 |
| 208826 H5N8 China A/duck/Eastern_China/L0611/2011 2011.441            | China       | duck              | Dom-ans       | 0 | 0 | 0 | X-A | 0   | 0   | 0   | 0   | 0   | 0 |
| 208825 H5N8 China A/duck/Eastern_China/L0423/2011 2011.307            | China       | duck              | Dom-ans       | 0 | 0 | 0 | X-A | 0   | 0   | 0   | 0   | 0   | 0 |
| 137255 H5N2 China A/duck/Hebei/3/2011 2011.932                        | China       | duck              | Dom-ans       | 0 | 0 | 0 | X-A | 0   | 0   | 0   | 0   | 0   | 0 |
| 208831 H5N8 China A/goose/Eastern_China/L1204/2012 2012.923           | China       | goose             | Dom-ans       | 0 | 0 | 0 | X-A | 0   | 0   | 0   | 0   | 0   | 0 |
| 201799 H5N8 China A/duck/Guangdong/s14044/2014 2014.014               | China       | duck              | Dom-ans       | 0 | 0 | 0 | X-A | 0   | 0   | 0   | 0   | 0   | 0 |
| 201798 H5N8 China A/goose/Guangdong/s13124/2013 2013.945              | China       | goose             | Dom-ans       | 0 | 0 | 0 | X-A | 0   | 0   | 0   | 0   | 0   | 0 |
| 167178 H5N8 China A/duck/Shandong/Q1/2013 2013.312                    | China       | duck              | Dom-ans       | 0 | 0 | 0 | X-A | 0   | 0   | 0   | 0   | 0   | 0 |
| 208829 H5N8 China A/duck/Eastern_China/L1120/2012 2012.885            | China       | duck              | Dom-ans       | 0 | 0 | 0 | X-A | 0   | 0   | 0   | 0   | 0   | 0 |
| 208827 H5N8 China A/duck/Eastern_China/L0722/2012 2012.553            | China       | duck              | Dom-ans       | 0 | 0 | 0 | X-A | 0   | 0   | 0   | 0   | 0   | 0 |
| 240679 H5N8 Kazakhstan A/graylag_goose/Kazakhstan/KR/2016 2016.619    | Kazakhstan  | graylag_goose     | Wild-ans      | 0 | 0 | 0 | 0   | X-D | 0   | X-A | X-A | 0   | 0 |
| 257090 H7N9 Bangladesh A/duck/Bangladesh/26992/2015 2015.940          | Bangladesh  | duck              | Dom-ans       | 0 | 0 | 0 | 0   | X-D | 0   | 0   | X-A | 0   | 0 |
| 260526 H7N7 Netherlands A/mallard/Netherlands/15/2015 2015.490        | Netherlands | mallard           | Wild-ans      | 0 | 0 | 0 | 0   | X-E | 0   | 0   | 0   | 0   | 0 |
| 267219 H6N2 Netherlands A/mallard_duck/Netherlands/11/2014 2014.890   | Netherlands | mallard_duck      | Wild-ans      | 0 | 0 | 0 | 0   | X-E | 0   | 0   | 0   | 0   | 0 |
| 243620 H6N2 Netherlands A/mallard_duck/Netherlands/7/2014 2014.748    | Netherlands | mallard_duck      | Wild-ans      | 0 | 0 | 0 | 0   | X-E | 0   | 0   | 0   | 0   | 0 |
| 267194 H2N9 Netherlands A/mallard_duck/Netherlands/14/2014 2014.652   | Netherlands | mallard_duck      | Wild-ans      | 0 | 0 | 0 | 0   | X-F | 0   | 0   | 0   | 0   | 0 |
| 267297 H2N9 Netherlands A/mallard_duck/Netherlands/16/2014 2014.658   | Netherlands | mallard_duck      | Wild-ans      | 0 | 0 | 0 | 0   | X-F | 0   | 0   | 0   | 0   | 0 |
| 267135 H5N8 Egypt A/green-winged_teal/Egypt/871/2016 2016.934         | Egypt       | green-winged_teal | Wild-ans-long | 0 | 0 | 0 | 0   | X-F | 0   | X-A | 0   | 0   | 0 |
| 229599 H9N2 Egypt A/pigeon/Egypt/S10409A/2014 2014.937                | Egypt       | pigeon            | Wild-other    | 0 | 0 | 0 | 0   | X-F | 0   | 0   | 0   | 0   | 0 |
| 203617 H9N5 Singapore A/common_redshank/Singapore/F83-2/2015 2015.688 | Singapore   | common_redshank   | Wild-other    | 0 | 0 | 0 | 0   | 0   | X-A | 0   | 0   | 0   | 0 |
| 266417 H5N8 Korea A/common_teal/Korea/W547/2016 2016.953              | Korea       | common_teal       | Wild-ans-long | 0 | 0 | 0 | 0   | 0   | 0   | X-A | 0   | 0   | 0 |
| 224744 H5N8 China A/Brown-headed_Gull/Qinghai/ZT03-B/2016 2016.359    | China       | Brown-headed_Gull | Wild-other    | 0 | 0 | 0 | 0   | 0   | 0   | 0   | X-A | 0   | 0 |
| 209119 H3N8 Mongolia A/duck/Mongolia/173/2015 2015.660                | Mongolia    | duck              | Dom-ans       | 0 | 0 | 0 | 0   | 0   | 0   | 0   | X-A | 0   | 0 |
| 179385 H3N6 Vietnam A/duck/Vietnam/LB M798/2014 2014.923              | Vietnam     | duck              | Dom-ans       | 0 | 0 | 0 | 0   | 0   | 0   | 0   | X-A | 0   | 0 |
| 266413 H1N1 China A/Anseriformes/Anhui/L25/2014 2014.973              | China       | Anseriformes      | Wild-ans      | 0 | 0 | 0 | 0   | 0   | 0   | 0   | X-A | 0   | 0 |
| 266407 H1N1 China A/Anseriformes/Anhui/S3/2014 2014.978               | China       | Anseriformes      | Wild-ans      | 0 | 0 | 0 | 0   | 0   | 0   | 0   | X-A | 0   | 0 |
| 257730 H1N1 Korea A/wild_bird/Korea/SK14/2014 2014.918                | Korea       | wild_bird         | Wild-other    | 0 | 0 | 0 | 0   | 0   | 0   | 0   | X-A | 0   | 0 |
| 205145 H6N2 China A/wild_bird/Wuhan/C DHN15/2015 2015.038             | China       | wild_bird         | Wild-other    | 0 | 0 | 0 | 0   | 0   | 0   | 0   | X-A | 0   | 0 |
| 243612 H7N7 Netherlands A/mallard_duck/Netherlands/2/2015 2015.041    | Netherlands | mallard_duck      | Wild-ans      | 0 | 0 | 0 | 0   | 0   | 0   | 0   | X-A | 0   | 0 |
| 243563 H7N7 Netherlands A/mallard_duck/Netherlands/3/2015 2015.063    | Netherlands | mallard_duck      | Wild-ans      | 0 | 0 | 0 | 0   | 0   | 0   | 0   | X-A | 0   | 0 |
| 267186 H7N5 Netherlands A/mallard_duck/Netherlands/8/2014 2014.822    | Netherlands | mallard_duck      | Wild-ans      | 0 | 0 | 0 | 0   | 0   | 0   | 0   | X-A | 0   | 0 |
| 258657 H5N2 SouthAfrica A/ostrich/South_Africa/325863/2015 2015.496   | SouthAfrica | ostrich           | Wild-other    | 0 | 0 | 0 | 0   | 0   | 0   | 0   | X-A | 0   | 0 |
| 209115 H4N6 Mongolia A/duck/Mongolia/127/2015 2015.660                | Mongolia    | duck              | Dom-ans       | 0 | 0 | 0 | 0   | 0   | 0   | 0   | X-A | 0   | 0 |

<sup>a</sup>Host species were categorized as follows: domestic anseriform birds (Dom-ans), domestic galliform birds (Dom-gal), long-range migratory wild anseriform birds (Wild-ans-long), other wild anseriform birds (Wild-ans), and other wild birds (Wild-other).



|        |                                                                     |                                                 |                                                                                                      |                                                               |
|--------|---------------------------------------------------------------------|-------------------------------------------------|------------------------------------------------------------------------------------------------------|---------------------------------------------------------------|
| 224745 | Asia / China / Qinghai Province                                     | A/Brown-headed Gull/Qinghai/ZTO3-LU/2016        | State Key Laboratory of Virology and Wuhan Institute of Virology, Chinese Academy of Sciences        | Wuhan Institute of Virology                                   |
| 224746 | Asia / China / Qinghai Province                                     | A/Brown-headed Gull/Qinghai/ZTO4-B/2016         | State Key Laboratory of Virology and Wuhan Institute of Virology, Chinese Academy of Sciences        | Wuhan Institute of Virology                                   |
| 224747 | Asia / China / Qinghai Province                                     | A/Brown-headed Gull/Qinghai/ZTO5-B/2016         | State Key Laboratory of Virology and Wuhan Institute of Virology, Chinese Academy of Sciences        | Wuhan Institute of Virology                                   |
| 224748 | Asia / China / Qinghai Province                                     | A/Brown-headed Gull/Qinghai/ZTO5-K/2016         | State Key Laboratory of Virology and Wuhan Institute of Virology, Chinese Academy of Sciences        | Wuhan Institute of Virology                                   |
| 224750 | Asia / China / Qinghai Province                                     | A/Brown-headed Gull/Qinghai/ZTO6-SP/2016        | State Key Laboratory of Virology and Wuhan Institute of Virology, Chinese Academy of Sciences        | Wuhan Institute of Virology                                   |
| 224751 | Asia / China / Qinghai Province                                     | A/Brown-headed Gull/Qinghai/ZTO6-MU/2016        | State Key Laboratory of Virology and Wuhan Institute of Virology, Chinese Academy of Sciences        | Wuhan Institute of Virology                                   |
| 224752 | Asia / China / Qinghai Province                                     | A/Great Black-headed Gull/Qinghai/YO1-B/2016    | State Key Laboratory of Virology and Wuhan Institute of Virology, Chinese Academy of Sciences        | Wuhan Institute of Virology                                   |
| 230820 | Europe / Russian Federation / Tyva Republic                         | A/great crested grebe/Tyva/34/2016              | State Research Center of Virology and Biotechnology (VECTOR)                                         | WHO National Influenza Centre Russian Federation              |
| 231684 | Europe / Russian Federation / Tyva Republic                         | A/wild duck/Tyva/35/2016                        | State Research Center of Virology and Biotechnology (VECTOR)                                         | WHO National Influenza Centre Russian Federation              |
| 231685 | Europe / Russian Federation / Tyva Republic                         | A/black-headed gull/Tyva/41/2016                | State Research Center of Virology and Biotechnology (VECTOR)                                         | WHO National Influenza Centre Russian Federation              |
| 234057 | Europe / Russian Federation / Tyva Republic                         | A/grey heron /Uvs-Nuur Lake/20/2016             | Research Institute of Experimental and Clinical Medicine                                             | Research Institute of Experimental and Clinical Medicine      |
| 234058 | Europe / Russian Federation / Tyva Republic                         | A/common tern /Uvs-Nuur Lake/26/2016            | Research Institute of Experimental and Clinical Medicine                                             | Research Institute of Experimental and Clinical Medicine      |
| 237553 | Asia / India / National Capital Territory of Delhi                  | A/duck/India/10CA01/2016                        | ICAR-National Institute of High Security Animal Diseases                                             | ICAR-National Institute of High Security Animal Diseases      |
| 237554 | Asia / India / Madhya Pradesh / Gwalior                             | A/painted stork/India/10CA03/2016               | ICAR-National Institute of High Security Animal Diseases                                             | ICAR-National Institute of High Security Animal Diseases      |
| 237730 | Europe / Hungary / Csongrad megye                                   | A/mute_swan/Hungary/51049/2016                  | National Food Chain Safety Office Veterinary Diagnostic Directorate Laboratory for Molecular Biology | Central Agricultural Office Veterinary Diagnostic Directorate |
| 237731 | Europe / Hungary / Bekes megye                                      | A/domestic_turkey/Hungary/53433/2016            | National Food Chain Safety Office Veterinary Diagnostic Directorate Laboratory for Molecular Biology | Central Agricultural Office Veterinary Diagnostic Directorate |
| 237733 | Europe / Germany / Schleswig-Holstein / Lake Plön                   | A/tufted_duck/Germany/AR8444-L01986/2016        |                                                                                                      | Friedrich-Loeffler-Institut                                   |
| 237921 | Europe / Poland / West Pomeranian Voivodeship                       | A/wild duck/Poland/82A/2016                     |                                                                                                      | National Veterinary Research Institut Poland, PIWet-PIB       |
| 237944 | Europe / Germany / Schleswig-Holstein / Lake Plön                   | A/tufted_duck/Germany/AR8444-L01987/2016        |                                                                                                      | Friedrich-Loeffler-Institut                                   |
| 237945 | Europe / Germany / Baden-Wuerttemberg / Lake Constance              | A/tufted_duck/Germany/AR8459-L01988/2016        |                                                                                                      | Friedrich-Loeffler-Institut                                   |
| 237958 | Europe / Germany / Schleswig-Holstein                               | A/tufted duck/Germany-SH/R8444/2016             |                                                                                                      | Friedrich-Loeffler-Institut                                   |
| 237964 | Europe / Hungary / Bacs-Kiskun / Kiskunmajsa                        | A/Mulard_duck/Hungary/54494/2016                | National Food Chain Safety Office Veterinary Diagnostic Directorate Laboratory for Molecular Biology | Central Agricultural Office Veterinary Diagnostic Directorate |
| 237965 | Europe / Hungary / Bacs-Kiskun / Bugac                              | A/goose/Hungary/55128/2016                      | National Food Chain Safety Office Veterinary Diagnostic Directorate Laboratory for Molecular Biology | Central Agricultural Office Veterinary Diagnostic Directorate |
| 237966 | Europe / Hungary / Bacs-Kiskun / Kiszállás                          | A/duck/Hungary/55191/2016                       | National Food Chain Safety Office Veterinary Diagnostic Directorate Laboratory for Molecular Biology | Central Agricultural Office Veterinary Diagnostic Directorate |
| 238037 | Europe / Germany / Schleswig-Holstein                               | A/turkey/Germany-SH/R8595/2016                  |                                                                                                      | Friedrich-Loeffler-Institut                                   |
| 238038 | Europe / Germany / Mecklenburg-Vorpommern                           | A/chicken/Germany-MV/R8790/2016                 |                                                                                                      | Friedrich-Loeffler-Institut                                   |
| 238039 | Europe / Germany / Schleswig-Holstein                               | A/chicken/Germany-SH/R8758/2016                 |                                                                                                      | Friedrich-Loeffler-Institut                                   |
| 238196 | Europe / Croatia / Vukovarsko-Srijemska Zupanija / Cerna, river Bid | A/mute swan/Croatia/70/2016                     |                                                                                                      | Croatian Veterinary Institute                                 |
| 238893 | Europe / Sweden / Skane Lan / Helsingborgs Kommun                   | A/Chicken/Sweden/SVA161122KU0453/SZ0209316/2016 | National Veterinary Institute                                                                        | National Veterinary Institute                                 |
| 238894 | Europe / Sweden / Skane Lan / Helsingborgs Kommun                   | A/Chicken/Sweden/SVA161122KU0453/SZ0209317/2016 | National Veterinary Institute                                                                        | National Veterinary Institute                                 |
| 238895 | Europe / Sweden / Skane Lan / Helsingborgs                          | A/Chicken/Sweden/SVA161122KU0453/SZ0209318/2016 | National Veterinary Institute                                                                        | National Veterinary Institute                                 |

|        |                                                                                 |                                                          |                                                                                                      |                                                                |
|--------|---------------------------------------------------------------------------------|----------------------------------------------------------|------------------------------------------------------------------------------------------------------|----------------------------------------------------------------|
|        | Kommun                                                                          |                                                          |                                                                                                      |                                                                |
| 238896 | Europe / Sweden / Skane Lan / Helsingborgs Kommun                               | A/Chicken/Sweden/SVA161122KU0453/SZ0209321/2016          | National Veterinary Institute                                                                        | National Veterinary Institute                                  |
| 238897 | Europe / Sweden / Skane Lan / Vellinge Kommun / Vellinge, Höllviken             | A/Common Goldeneye/Sweden/SVA161117KU0322/SZ0002165/2016 | National Veterinary Institute                                                                        | National Veterinary Institute                                  |
| 239419 | Europe / Hungary / Jasz-Nagykun-Szolnok                                         | A/chicken/Hungary/59048/2016                             | National Food Chain Safety Office Veterinary Diagnostic Directorate Laboratory for Molecular Biology | Central Agricultural Office Veterinary Diagnostic Directorate  |
| 239420 | Europe / Hungary / Bacs-Kiskun                                                  | A/duck/Hungary/60441/2016                                | National Food Chain Safety Office Veterinary Diagnostic Directorate Laboratory for Molecular Biology | Central Agricultural Office Veterinary Diagnostic Directorate  |
| 239434 | Europe / Switzerland / Neuenburgersee                                           | A/tufted_duck/Switzerland/V246-L02001/2016               | Institut für Virologie und Immunologie - Bundesamt für Lebensmittelsicherheit und Veterinärwesen     | Friedrich-Loeffler-Institut                                    |
| 239435 | Europe / Switzerland / Lake Constance                                           | A/tufted_duck/Switzerland/V254-L02002/2016               | Institut für Virologie und Immunologie - Bundesamt für Lebensmittelsicherheit und Veterinärwesen     | Friedrich-Loeffler-Institut                                    |
| 239436 | Europe / Switzerland / Bielsee                                                  | A/tufted_duck/Switzerland/V237-L02003/2016               | Institut für Virologie und Immunologie - Bundesamt für Lebensmittelsicherheit und Veterinärwesen     | Friedrich-Loeffler-Institut                                    |
| 239437 | Europe / Switzerland / Neuenburgersee                                           | A/caspian_gull/Switzerland/V247-L02004/2016              | Institut für Virologie und Immunologie - Bundesamt für Lebensmittelsicherheit und Veterinärwesen     | Friedrich-Loeffler-Institut                                    |
| 239801 | Europe / United Kingdom / Lincolnshire / Louth                                  | A/turkey/England/052131/2016                             | Animal and Plant Health Agency (APHA)                                                                | Animal and Plant Health Agency (APHA)                          |
| 239997 | Europe / France / Region Nord-Pas-De Calais / Departement du Pas-de-Calais      | A/decoy_duck/France/161104e/2016                         | Anses (Ploufragan-Plouzané)                                                                          | ANSES Agence Nationale De Securite Sanitaire De L'alimentation |
| 240012 | Europe / France / Midi-Pyrenees / Departement du Tarn                           | A/duck/France/161108h/2016                               |                                                                                                      | ANSES Agence Nationale De Securite Sanitaire De L'alimentation |
| 240101 | Europe / Croatia / Sisacko-Moslavacka Zupanija / Crkveni Bok                    | A/mute swan/Croatia/102/2016                             |                                                                                                      | Croatian Veterinary Institute                                  |
| 240102 | Europe / Poland / Lubusz Voivodeship                                            | A/domestic goose/Poland/33/2016                          |                                                                                                      | National Veterinary Research Institut Poland, PIWet-PIB        |
| 240104 | Europe / Poland / Subcarpathian Voivodeship                                     | A/chicken/Poland/79A/2016                                |                                                                                                      | National Veterinary Research Institut Poland, PIWet-PIB        |
| 240110 | Europe / Russian Federation / Astrakhan Oblast                                  | A/chicken/Astrakhan/3131/2016                            |                                                                                                      | State Research Center of Virology and Biotechnology (VECTOR)   |
| 240111 | Europe / Poland / West Pomeranian Voivodeship / Swinoujscie                     | A/herring gull/Poland/84/2016                            |                                                                                                      | National Veterinary Research Institut Poland, PIWet-PIB        |
| 240677 | Europe / Russian Federation / Novosibirsk Oblast                                | A/domestic duck/Siberia/103/2016                         | Research Institute of Experimental and Clinical Medicine                                             | Research Institute of Experimental and Clinical Medicine       |
| 240892 | Europe / Germany / Lower Saxony                                                 | A/turkey/Germany-NI/R10523/2016                          |                                                                                                      | Friedrich-Loeffler-Institut                                    |
| 240893 | Europe / Germany / Saxony                                                       | A/swan/Germany-SN/R10645/2016                            |                                                                                                      | Friedrich-Loeffler-Institut                                    |
| 241249 | Europe / Germany / Mecklenburg-Vorpommern                                       | A/domestic duck/Germany-MV/R9869/2016                    |                                                                                                      | Friedrich-Loeffler-Institut                                    |
| 242817 | Europe / Czech Republic / South Moravian Region / Okres Breclav / Brod nad Dují | A/chicken/Czech Republic/206-17_2/2017(H5N8)             |                                                                                                      | State Veterinary Institute Prague                              |
| 242902 | Europe / Italy / Friuli-Venezia Giulia / Province of Gorizia                    | A/wigeon/Italy/17VIR57-3/2017                            | Istituto Zooprofilattico Sperimentale Delle Veneziae                                                 | Istituto Zooprofilattico Sperimentale Delle Veneziae           |
| 243049 | Europe / Germany / Schleswig-Holstein                                           | A/turkey/Germany-SH/R425/2017                            |                                                                                                      | Friedrich-Loeffler-Institut                                    |
| 243050 | Europe / Germany / Schleswig-Holstein                                           | A/barnacle goose/Germany-SH/R11505/2016                  |                                                                                                      | Friedrich-Loeffler-Institut                                    |
| 243085 | Europe / Italy / Friuli-Venezia Giulia / Province of Gorizia                    | A/wigeon/Italy/16VIR9616-3/2016                          | Istituto Zooprofilattico Sperimentale Delle Veneziae                                                 | Istituto Zooprofilattico Sperimentale Delle Veneziae           |
| 243698 | Europe / Croatia / Osjecko-Baranjska Zupanija                                   | A/mute swan/Croatia/42/2017                              |                                                                                                      | Croatian Veterinary Institute                                  |
| 247429 | Europe / Germany / Brandenburg                                                  | A/domestic duck/Germany-BB/R681ff/2017                   |                                                                                                      | Friedrich-Loeffler-Institut                                    |
| 247713 | Europe / Denmark / Region Hovedstaden / Kobenhavns Kommune / Christiania        | A/tufted duck/Denmark/17740-1/2016                       | Technical University of Denmark                                                                      | Animal and Plant Health Agency (APHA)                          |

|        |                                                                 |                                                |                                                                                                      |                                                               |
|--------|-----------------------------------------------------------------|------------------------------------------------|------------------------------------------------------------------------------------------------------|---------------------------------------------------------------|
| 247715 | Europe / Russian Federation / Voronezh Oblast                   | A/long-eared owl/Voronezh/15/2017              |                                                                                                      | State Research Center of Virology and Biotechnology (VECTOR)  |
| 247716 | Europe / Russian Federation / Voronezh Oblast                   | A/Ural owl/Voronezh/14/2017                    |                                                                                                      | State Research Center of Virology and Biotechnology (VECTOR)  |
| 247717 | Europe / Russian Federation / Voronezh Oblast                   | A/long-eared owl/Voronezh/16/2017              |                                                                                                      | State Research Center of Virology and Biotechnology (VECTOR)  |
| 247718 | Europe / Russian Federation / Voronezh Oblast                   | A/chicken/Voronezh/18/2017                     |                                                                                                      | State Research Center of Virology and Biotechnology (VECTOR)  |
| 247719 | Europe / Russian Federation / Voronezh Oblast                   | A/chicken/Voronezh/19/2017                     |                                                                                                      | State Research Center of Virology and Biotechnology (VECTOR)  |
| 247720 | Europe / Russian Federation / Voronezh Oblast                   | A/chicken/Voronezh/20/2017                     |                                                                                                      | State Research Center of Virology and Biotechnology (VECTOR)  |
| 247721 | Europe / Russian Federation / Rostov Oblast                     | A/turkey/Rostov-on-Don/11/2017                 |                                                                                                      | State Research Center of Virology and Biotechnology (VECTOR)  |
| 247722 | Europe / Russian Federation / Krasnodar Krai                    | A/goose/Krasnodar/3144/2017                    |                                                                                                      | State Research Center of Virology and Biotechnology (VECTOR)  |
| 247723 | Europe / Russian Federation / Krasnodar Krai                    | A/mute swan/Krasnodar/25/2017                  |                                                                                                      | State Research Center of Virology and Biotechnology (VECTOR)  |
| 247724 | Europe / Russian Federation / Republic of Tatarstan             | A/wild duck/Tatarstan/3059/2016                |                                                                                                      | State Research Center of Virology and Biotechnology (VECTOR)  |
| 247725 | Europe / Russian Federation / Republic of Kalmykia              | A/chicken/Kalmykia/2643/2016                   |                                                                                                      | State Research Center of Virology and Biotechnology (VECTOR)  |
| 249681 | Europe / Germany / Brandenburg / LK Ostprignitz-Ruppin          | A/turkey/Germany-BB/R234ff/2017                |                                                                                                      | Friedrich-Loeffler-Institut                                   |
| 249682 | Europe / Germany / Bavaria / LK Regensburg                      | A/domestic goose/Germany-BY/R677/2017          |                                                                                                      | Friedrich-Loeffler-Institut                                   |
| 249691 | Europe / Germany / Mecklenburg-Vorpommern / Neukloster          | A/chicken/Germany-MV/R10048/2016               |                                                                                                      | Friedrich-Loeffler-Institut                                   |
| 249692 | Europe / Germany / Lower Saxony / LK Northeim                   | A/chicken/Germany-NI/R11406/2016               |                                                                                                      | Friedrich-Loeffler-Institut                                   |
| 250231 | Europe / Russian Federation / Novosibirsk Oblast / Chany lake   | A/domestic_duck/Siberia/49_feather/2016        | Research Institute of Experimental and Clinical Medicine                                             | WHO National Influenza Centre Russian Federation              |
| 250885 | Europe / Czech Republic / South Moravian Region / Okres Blansko | A/mute swan/Czech Republic/54-17_2/2017 (H5N8) |                                                                                                      | State Veterinary Institute Prague                             |
| 250887 | Europe / Czech Republic / South Moravian Region / Okres Znojmo  | A/chicken/Czech Republic/55-17_1/2017 (H5N8)   |                                                                                                      | State Veterinary Institute Prague                             |
| 253036 | Europe / United Kingdom / Lincolnshire                          | A/turkey/England/003778/2017                   | Animal and Plant Health Agency (APHA)                                                                | Animal and Plant Health Agency (APHA)                         |
| 253037 | Europe / United Kingdom / County of Carmarthenshire             | A/chicken/Wales/000023/2016                    | Animal and Plant Health Agency (APHA)                                                                | Animal and Plant Health Agency (APHA)                         |
| 254725 | Asia / Korea, Republic of / Jeollabuk-do                        | A/chicken/Korea/H903/2017                      | Animal and Plant Quarantine Agency (O-2015)                                                          | Animal and Plant Quarantine Agency (S-2026)                   |
| 254745 | Asia / Korea, Republic of / Chungcheongnam-do                   | A/mallard duck/Korea/WA137/2017                | Animal and Plant Quarantine Agency (O-2015)                                                          | Animal and Plant Quarantine Agency (S-2026)                   |
| 254814 | Europe / Hungary / Hajdu-Bihar                                  | A/mallard/Hungary/57857/2016                   | National Food Chain Safety Office Veterinary Diagnostic Directorate Laboratory for Molecular Biology | Central Agricultural Office Veterinary Diagnostic Directorate |
| 255174 | Europe / Hungary / Hajdu-Bihar                                  | A/Goose/Hungary/65817/2016                     | National Food Chain Safety Office Veterinary Diagnostic Directorate Laboratory for Molecular Biology | Central Agricultural Office Veterinary Diagnostic Directorate |
| 255181 | Europe / Italy / Udine                                          | A/swan/Italy/17VIR537-2/2017                   | Istituto Zooprofilattico Sperimentale Delle Venezia                                                  | Istituto Zooprofilattico Sperimentale Delle Venezia           |
| 255182 | Europe / Italy / Venezia                                        | A/turkey/Italy/17VIR538-1/2017                 | Istituto Zooprofilattico Sperimentale Delle Venezia                                                  | Istituto Zooprofilattico Sperimentale Delle Venezia           |
| 255183 | Europe / Italy / Padova                                         | A/turkey/Italy/17VIR576-11/2017                | Istituto Zooprofilattico Sperimentale Delle Venezia                                                  | Istituto Zooprofilattico Sperimentale Delle Venezia           |
| 255184 | Europe / Italy / Rovigo                                         | A/chicken/Italy/17VIR653-12/2017               | Istituto Zooprofilattico Sperimentale Delle Venezia                                                  | Istituto Zooprofilattico Sperimentale Delle Venezia           |
| 255185 | Europe / Italy / Parma                                          | A/turkey/Italy/17VIR973-2/2017                 | Istituto Zooprofilattico Sperimentale Delle Venezia                                                  | Istituto Zooprofilattico Sperimentale Delle Venezia           |

|        |                                                |                                      |                                                                                                      |                                                               |
|--------|------------------------------------------------|--------------------------------------|------------------------------------------------------------------------------------------------------|---------------------------------------------------------------|
| 255186 | Europe / Italy / Mantova                       | A/turkey/Italy/17VIR1338-3/2017      | Istituto Zooprofilattico Sperimentale Delle Venezie                                                  | Istituto Zooprofilattico Sperimentale Delle Venezie           |
| 255187 | Europe / Italy / Verona                        | A/turkey/Italy/17VIR1452-22/2017     | Istituto Zooprofilattico Sperimentale Delle Venezie                                                  | Istituto Zooprofilattico Sperimentale Delle Venezie           |
| 255189 | Europe / Italy / Gorizia                       | A/gadwall/Italy/17VIR133-2/2017      | Istituto Zooprofilattico Sperimentale Delle Venezie                                                  | Istituto Zooprofilattico Sperimentale Delle Venezie           |
| 255190 | Europe / Hungary / Somogy megye / Somogy       | A/Mute swan/Hungary/119/2017         | National Food Chain Safety Office Veterinary Diagnostic Directorate Laboratory for Molecular Biology | Central Agricultural Office Veterinary Diagnostic Directorate |
| 255191 | Europe / Hungary / Budapest fovaros / Budapest | A/Harris Hawk/Hungary/120/2017       | National Food Chain Safety Office Veterinary Diagnostic Directorate Laboratory for Molecular Biology | Central Agricultural Office Veterinary Diagnostic Directorate |
| 255192 | Europe / Hungary / Jasz-Nagykun-Szolnok        | A/Goose/Hungary/982/2017             | National Food Chain Safety Office Veterinary Diagnostic Directorate Laboratory for Molecular Biology | Central Agricultural Office Veterinary Diagnostic Directorate |
| 255193 | Europe / Hungary / Bekes megye                 | A/Duck/Hungary/984/2017              | National Food Chain Safety Office Veterinary Diagnostic Directorate Laboratory for Molecular Biology | Central Agricultural Office Veterinary Diagnostic Directorate |
| 255194 | Europe / Hungary / Csongrad megye              | A/Goose/Hungary/1030/2017            | National Food Chain Safety Office Veterinary Diagnostic Directorate Laboratory for Molecular Biology | Central Agricultural Office Veterinary Diagnostic Directorate |
| 255195 | Europe / Hungary / Bacs-Kiskun                 | A/Duck/Hungary/1588/2017             | National Food Chain Safety Office Veterinary Diagnostic Directorate Laboratory for Molecular Biology | Central Agricultural Office Veterinary Diagnostic Directorate |
| 255196 | Europe / Hungary / Fejer megye                 | A/Greylag_goose/Hungary/1941/2017    | National Food Chain Safety Office Veterinary Diagnostic Directorate Laboratory for Molecular Biology | Central Agricultural Office Veterinary Diagnostic Directorate |
| 255197 | Europe / Hungary / Veszprem megye              | A/Mute swan/Hungary/1955/2017        | National Food Chain Safety Office Veterinary Diagnostic Directorate Laboratory for Molecular Biology | Central Agricultural Office Veterinary Diagnostic Directorate |
| 255198 | Europe / Hungary / Veszprem megye              | A/Turkey/Hungary/2030/2017           | National Food Chain Safety Office Veterinary Diagnostic Directorate Laboratory for Molecular Biology | Central Agricultural Office Veterinary Diagnostic Directorate |
| 255199 | Europe / Hungary / Borsod-Abauj-Zemlen         | A/Mute swan/Hungary/2193/2017        | National Food Chain Safety Office Veterinary Diagnostic Directorate Laboratory for Molecular Biology | Central Agricultural Office Veterinary Diagnostic Directorate |
| 255200 | Europe / Hungary / Somogy megye / Somogy       | A/Mute swan/Hungary/2508/2017        | National Food Chain Safety Office Veterinary Diagnostic Directorate Laboratory for Molecular Biology | Central Agricultural Office Veterinary Diagnostic Directorate |
| 255201 | Europe / Hungary / Tolna megye / Tolna         | A/Mute swan/Hungary/2825/2017        | National Food Chain Safety Office Veterinary Diagnostic Directorate Laboratory for Molecular Biology | Central Agricultural Office Veterinary Diagnostic Directorate |
| 255202 | Europe / Hungary / Zala                        | A/Mute swan/Hungary/3139/2017        | National Food Chain Safety Office Veterinary Diagnostic Directorate Laboratory for Molecular Biology | Central Agricultural Office Veterinary Diagnostic Directorate |
| 255203 | Europe / Hungary / Vas                         | A/Mute swan/Hungary/3513/2017        | National Food Chain Safety Office Veterinary Diagnostic Directorate Laboratory for Molecular Biology | Central Agricultural Office Veterinary Diagnostic Directorate |
| 255204 | Europe / Hungary / Budapest fovaros            | A/Mute swan/Hungary/3542/2017        | National Food Chain Safety Office Veterinary Diagnostic Directorate Laboratory for Molecular Biology | Central Agricultural Office Veterinary Diagnostic Directorate |
| 255205 | Europe / Hungary / Jasz-Nagykun-Szolnok        | A/Chicken/Hungary/2496/2017          | National Food Chain Safety Office Veterinary Diagnostic Directorate Laboratory for Molecular Biology | Central Agricultural Office Veterinary Diagnostic Directorate |
| 255206 | Europe / Hungary / Gyor-Moson-Sopron           | A/Peregrine_falcon/Hungary/4882/2017 | National Food Chain Safety Office Veterinary Diagnostic Directorate Laboratory for Molecular Biology | Central Agricultural Office Veterinary Diagnostic Directorate |
| 255207 | Europe / Hungary / Tolna megye / Tolna         | A/Mute swan/Hungary/5316/2017        | National Food Chain Safety Office Veterinary Diagnostic Directorate Laboratory for Molecular Biology | Central Agricultural Office Veterinary Diagnostic Directorate |
| 255208 | Europe / Hungary / Tolna megye / Tolna         | A/Common_buzzard/Hungary/7061/2017   | National Food Chain Safety Office Veterinary Diagnostic Directorate Laboratory for Molecular Biology | Central Agricultural Office Veterinary Diagnostic Directorate |
| 255209 | Europe / Hungary / Tolna megye                 | A/Common_tern/Hungary/8187/2017      | National Food Chain Safety Office Veterinary Diagnostic Directorate Laboratory for Molecular Biology | Central Agricultural Office Veterinary Diagnostic Directorate |
| 255210 | Europe / Hungary / Pest megye / Pest           | A/Harris_hawk/Hungary/2762a/2017     | National Food Chain Safety Office Veterinary Diagnostic Directorate Laboratory for Molecular Biology | Central Agricultural Office Veterinary Diagnostic Directorate |
| 255211 | Europe / Hungary / Pest megye / Pest           | A/Harris_hawk/Hungary/2762b/2017     | National Food Chain Safety Office Veterinary Diagnostic Directorate Laboratory for Molecular Biology | Central Agricultural Office Veterinary Diagnostic Directorate |
| 255212 | Europe / Hungary / Somogy megye / Somogy       | A/Greylag_goose/Hungary/320/2017     | National Food Chain Safety Office Veterinary Diagnostic Directorate Laboratory for Molecular Biology | Central Agricultural Office Veterinary Diagnostic Directorate |
| 255213 | Europe / Hungary / Hajdu-Bihar                 | A/GuineaFowl/Hungary/596/2017        | National Food Chain Safety Office Veterinary Diagnostic Directorate Laboratory for Molecular Biology | Central Agricultural Office Veterinary Diagnostic Directorate |
| 255214 | Europe / Hungary / Gyor-Moson-Sopron           | A/Chicken/Hungary/1751/2017          | National Food Chain Safety Office Veterinary Diagnostic Directorate Laboratory for Molecular Biology | Central Agricultural Office Veterinary Diagnostic Directorate |
| 255215 | Europe / Hungary / Zala                        | A/Mute swan/Hungary/3137/2017        | National Food Chain Safety Office Veterinary Diagnostic Directorate Laboratory for Molecular Biology | Central Agricultural Office Veterinary Diagnostic Directorate |
| 255216 | Europe / Hungary / Zala                        | A/Mallard/Hungary/5821/2017          | National Food Chain Safety Office Veterinary Diagnostic Directorate Laboratory for Molecular Biology | Central Agricultural Office Veterinary Diagnostic             |



|        |                                                                |                                              |                                                                                                      |                                                               |
|--------|----------------------------------------------------------------|----------------------------------------------|------------------------------------------------------------------------------------------------------|---------------------------------------------------------------|
|        |                                                                |                                              |                                                                                                      | Directorate                                                   |
| 255218 | Europe / Hungary / Somogy megye / Somogy                       | A/Mallard/Hungary/1574b/2017                 | National Food Chain Safety Office Veterinary Diagnostic Directorate Laboratory for Molecular Biology | Central Agricultural Office Veterinary Diagnostic Directorate |
| 255219 | Europe / Hungary / Hajdu-Bihar                                 | A/White_fronted_goose/Hungary/801/2017       | National Food Chain Safety Office Veterinary Diagnostic Directorate Laboratory for Molecular Biology | Central Agricultural Office Veterinary Diagnostic Directorate |
| 255220 | Europe / Hungary / Somogy megye / Somogy                       | A/Mallard/Hungary/1574a/2017                 | National Food Chain Safety Office Veterinary Diagnostic Directorate Laboratory for Molecular Biology | Central Agricultural Office Veterinary Diagnostic Directorate |
| 255398 | Europe / Hungary / Csongrad megye / Csongrad                   | A/Goose/Hungary/59712/2016                   | National Food Chain Safety Office Veterinary Diagnostic Directorate Laboratory for Molecular Biology | Central Agricultural Office Veterinary Diagnostic Directorate |
| 255891 | Europe / Netherlands / Provincie Noord-Holland / Edam-Volendam | A/Tufted Duck/Netherlands/1/2016             | Erasmus Medical Center                                                                               | Erasmus Medical Center                                        |
| 255892 | Europe / Netherlands / Provincie Noord-Holland                 | A/Great Black-backed Gull/Netherlands/2/2016 | Erasmus Medical Center                                                                               | Erasmus Medical Center                                        |
| 255910 | Europe / Netherlands / Provincie Noord-Holland                 | A/Mew Gull/Netherlands/1/2016                | Erasmus Medical Center                                                                               | Erasmus Medical Center                                        |
| 255912 | Europe / Netherlands / South Holland                           | A/Eurasian Wigeon/Netherlands/4/2016         | Erasmus Medical Center                                                                               | Erasmus Medical Center                                        |
| 255913 | Europe / Netherlands / South Holland                           | A/Mallard/Netherlands/2/2017                 | Erasmus Medical Center                                                                               | Erasmus Medical Center                                        |
| 255914 | Europe / Netherlands / Provincie Noord-Holland                 | A/Eurasian Wigeon/Netherlands/9/2016         | Erasmus Medical Center                                                                               | Erasmus Medical Center                                        |
| 255917 | Europe / Poland / Lower Silesian Voivodeship                   | A/mute swan/Poland/64/2017                   |                                                                                                      | National Veterinary Research Institut Poland, PIWet-PIB       |
| 255933 | Europe / Hungary / Komárom-Esztergom                           | A/Cormorant/Hungary/6102/2017                | National Food Chain Safety Office Veterinary Diagnostic Directorate Laboratory for Molecular Biology | Central Agricultural Office Veterinary Diagnostic Directorate |
| 255934 | Europe / Hungary / Komárom-Esztergom                           | A/Mute swan/Hungary/6092/2017                | National Food Chain Safety Office Veterinary Diagnostic Directorate Laboratory for Molecular Biology | Central Agricultural Office Veterinary Diagnostic Directorate |
| 255935 | Europe / Hungary / Zala                                        | A/Mute swan/Hungary/6276/2017                | National Food Chain Safety Office Veterinary Diagnostic Directorate Laboratory for Molecular Biology | Central Agricultural Office Veterinary Diagnostic Directorate |
| 255936 | Europe / Hungary / Jász-Nagykun-Szolnok                        | A/Pheasant/Hungary/6553/2017                 | National Food Chain Safety Office Veterinary Diagnostic Directorate Laboratory for Molecular Biology | Central Agricultural Office Veterinary Diagnostic Directorate |
| 255937 | Europe / Hungary / Jász-Nagykun-Szolnok                        | A/Pheasant/Hungary/7685/2017                 | National Food Chain Safety Office Veterinary Diagnostic Directorate Laboratory for Molecular Biology | Central Agricultural Office Veterinary Diagnostic Directorate |
| 255938 | Europe / Hungary / Szabolcs-Szatmár-Bereg                      | A/Rook/Hungary/4975/2017                     | National Food Chain Safety Office Veterinary Diagnostic Directorate Laboratory for Molecular Biology | Central Agricultural Office Veterinary Diagnostic Directorate |
| 256298 | Europe / Russian Federation / Kurgan Oblast                    | A/gadwall/Kurgan/2442/2016                   |                                                                                                      | State Research Center of Virology and Biotechnology (VECTOR)  |
| 256299 | Europe / Russian Federation / Moscow Oblast                    | A/chicken/Sergiyev Posad/38/2017             |                                                                                                      | State Research Center of Virology and Biotechnology (VECTOR)  |
| 256300 | Europe / Russian Federation / Moscow Oblast                    | A/chicken/Sergiyev Posad/39/2017             |                                                                                                      | State Research Center of Virology and Biotechnology (VECTOR)  |
| 256301 | Europe / Russian Federation / Kamchatka Krai                   | A/environment/Kamchatka/18/2016              |                                                                                                      | State Research Center of Virology and Biotechnology (VECTOR)  |
| 256305 | Europe / Italy / Rovigo                                        | A/shelduck/Italy/17VIR1572-24/2017           | Istituto Zooprofilattico Sperimentale Delle Venezia                                                  | Istituto Zooprofilattico Sperimentale Delle Venezia           |
| 256306 | Europe / Italy / Mantova                                       | A/turkey/Italy/17VIR1574-1/2017              | Istituto Zooprofilattico Sperimentale Delle Venezia                                                  | Istituto Zooprofilattico Sperimentale Delle Venezia           |
| 256307 | Europe / Italy / Venezia                                       | A/chicken/Italy/17VIR1684-2/2017             | Istituto Zooprofilattico Sperimentale Delle Venezia                                                  | Istituto Zooprofilattico Sperimentale Delle Venezia           |
| 256308 | Europe / Italy / Venezia                                       | A/chicken/Italy/17VIR1751-3/2017             | Istituto Zooprofilattico Sperimentale Delle Venezia                                                  | Istituto Zooprofilattico Sperimentale Delle Venezia           |
| 256453 | Europe / Hungary / Bacs-Kiskun                                 | A/Duck/Hungary/54738/2016                    | National Food Chain Safety Office Veterinary Diagnostic Directorate Laboratory for Molecular Biology | Central Agricultural Office Veterinary Diagnostic Directorate |
| 256457 | Europe / Hungary / Bacs-Kiskun                                 | A/Duck/Hungary/55764/2016                    | National Food Chain Safety Office Veterinary Diagnostic Directorate Laboratory for Molecular Biology | Central Agricultural Office Veterinary Diagnostic Directorate |
| 256460 | Europe / Hungary / Bekes megye / Bekes                         | A/Turkey/Hungary/53136/2016                  | National Food Chain Safety Office Veterinary Diagnostic Directorate Laboratory for Molecular Biology | Central Agricultural Office Veterinary Diagnostic Directorate |
| 256462 | Europe / Hungary / Budapest fovaros                            | A/Mute swan/Hungary/5879/2017                | National Food Chain Safety Office Veterinary Diagnostic Directorate Laboratory for Molecular Biology | Central Agricultural Office Veterinary Diagnostic Directorate |
| 256817 | Europe / Germany / Lower Saxony                                | A/turkey/Germany-NI/R9807/2016               |                                                                                                      | Friedrich-Loeffler-Institut                                   |

|        |                                                             |                                                    |                                                                                          |                                                          |
|--------|-------------------------------------------------------------|----------------------------------------------------|------------------------------------------------------------------------------------------|----------------------------------------------------------|
| 256818 | Europe / Germany / Mecklenburg-Vorpommern                   | A/domestic duck/Germany-MV/R9764/2016              |                                                                                          | Friedrich-Loeffler-Institut                              |
| 257004 | Europe / Czech Republic                                     | A/chicken/Czech Republic/206-17_2/2017             |                                                                                          | Other Database Import                                    |
| 257699 | Europe / Switzerland / Kanton Bern / Amt Biel / Lake Biel   | A/Tufted Duck/Switzerland/V237/2016                | Institute of Virology and Immunology IVI                                                 | Faculty of Veterinary Medicine at the University of Bern |
| 257731 | Europe / Germany / Brandenburg                              | A/turkey/Germany-BB/R377ff/2017                    |                                                                                          | Friedrich-Loeffler-Institut                              |
| 259074 | Europe / Germany / Saxony                                   | A/common buzzard/Germany-SN/R1117/2017             |                                                                                          | Friedrich-Loeffler-Institut                              |
| 260058 | Europe / Germany / Saxony                                   | A/grey heron/Germany-SN/R572/2017                  |                                                                                          | Friedrich-Loeffler-Institut                              |
| 260059 | Europe / Germany / Schleswig-Holstein                       | A/cormorant/Germany-SH/R896/2017                   |                                                                                          | Friedrich-Loeffler-Institut                              |
| 261332 | Europe / Croatia / Krapinsko-Zagorska Zupanija / Špičkovina | A/chicken/Croatia/104/2017                         |                                                                                          | Croatian Veterinary Institute                            |
| 261634 | Europe / Macedonia, the former Yugoslav Republic of         | A/chicken/Republic of Macedonia/AR1167-L02131/2017 | University "Ss. Cyril and Methodius", Veterinary Institute, Department of Avian diseases | Friedrich-Loeffler-Institut                              |
| 261687 | Europe / Germany / Baden-Wuerttemberg                       | A/black swan/Germany-BW/R1364/2017                 |                                                                                          | Friedrich-Loeffler-Institut                              |
| 262055 | Europe / Germany / Lower Saxony / Wilhelmshaven             | A/eurasian wigeon/Germany-NI/AR249-L02143/2017     |                                                                                          | Friedrich-Loeffler-Institut                              |
| 262056 | Europe / Germany / Lower Saxony / Wangerland                | A/greylag goose/Germany-NI/AR11353-L02142/2016     |                                                                                          | Friedrich-Loeffler-Institut                              |
| 262057 | Europe / Germany / Lower Saxony / Ammerland                 | A/mute swan/Germany-NI/AR1529-L02145/2017          |                                                                                          | Friedrich-Loeffler-Institut                              |
| 262058 | Europe / Germany / Lower Saxony / Peine                     | A/greylag goose/Germany-NI/AR1395-L02144/2017      |                                                                                          | Friedrich-Loeffler-Institut                              |
| 262059 | Europe / Germany / Lower Saxony / Hemmingen                 | A/greylag goose/Germany-NI/AR703-L02138/2017       |                                                                                          | Friedrich-Loeffler-Institut                              |
| 263097 | Europe / Germany / Lower Saxony / Kreis Wittmund            | A/domestic_duck/Germany-NI/AR2054-L02155/2017      |                                                                                          | Friedrich-Loeffler-Institut                              |
| 263099 | Europe / Germany / Lower Saxony / Kreis Emsland             | A/domestic_goose/Germany-NI/AR519-L02153/2017      |                                                                                          | Friedrich-Loeffler-Institut                              |
| 263101 | Europe / Germany / Lower Saxony / Kreis Cloppenburg         | A/turkey/Germany-NI/AR2659-L02159/2017             |                                                                                          | Friedrich-Loeffler-Institut                              |
| 263103 | Europe / Germany / Lower Saxony / Kreis Cloppenburg         | A/turkey/Germany-NI/AR01-L02115/2017               |                                                                                          | Friedrich-Loeffler-Institut                              |
| 263117 | Europe / Germany / Lower Saxony / Kreis Oldenburg           | A/turkey/Germany-NI/AR11365-L02128/2016            |                                                                                          | Friedrich-Loeffler-Institut                              |
| 263118 | Europe / Germany / Lower Saxony / Kreis Cloppenburg         | A/turkey/Germany-NI/AR11416-L02124/2016            |                                                                                          | Friedrich-Loeffler-Institut                              |
| 263119 | Europe / Germany / Lower Saxony / Kreis Oldenburg           | A/turkey/Germany-NI/AR11461-L02127-40/2016         |                                                                                          | Friedrich-Loeffler-Institut                              |
| 263120 | Europe / Germany / Lower Saxony / Kreis Oldenburg           | A/turkey/Germany-NI/AR11550-L02126/2016            |                                                                                          | Friedrich-Loeffler-Institut                              |
| 266417 | Asia / Korea, Republic of                                   | A/common teal/Korea/W547/2016                      |                                                                                          | Other Database Import                                    |
| 266418 | Asia / Korea, Republic of                                   | A/common teal/Korea/W549/2016                      |                                                                                          | Other Database Import                                    |
| 266419 | Asia / Korea, Republic of                                   | A/common teal/Korea/W548/2016                      |                                                                                          | Other Database Import                                    |
| 266420 | Asia / Korea, Republic of                                   | A/common teal/Korea/W550/2016                      |                                                                                          | Other Database Import                                    |
| 266421 | Asia / Korea, Republic of                                   | A/common teal/Korea/W555/2017                      |                                                                                          | Other Database Import                                    |
| 266536 | Europe / Belgium                                            | A/chicken/Belgium/807/2017                         | Sciensano                                                                                | Sciensano                                                |
| 266537 | Europe / Belgium                                            | A/peacock/Belgium/1017/2017                        | Sciensano                                                                                | Sciensano                                                |
| 266538 | Europe / Belgium                                            | A/Cygnus olor/Belgium/1567/2017                    | Sciensano                                                                                | Sciensano                                                |
| 266944 | Europe / Germany / Saxony-Anhalt                            | A/emu/Germany-ST/R321/2017                         |                                                                                          | Friedrich-Loeffler-Institut                              |
| 266945 | Europe / Germany / Saxony                                   | A/greylag goose/Germany-SN/R513/2017               |                                                                                          | Friedrich-Loeffler-Institut                              |
| 266946 | Europe / Germany / Schleswig-Holstein                       | A/egret/Germany-SH/R1315/2017                      |                                                                                          | Friedrich-Loeffler-Institut                              |
| 267135 | Africa / Egypt                                              | A/green-winged teal/Egypt/871/2016                 |                                                                                          | Other Database Import                                    |

|        |                                                                  |                                                   |                                                                                                            |                                   |
|--------|------------------------------------------------------------------|---------------------------------------------------|------------------------------------------------------------------------------------------------------------|-----------------------------------|
| 267136 | Africa / Egypt                                                   | A/green-winged teal/Egypt/877/2016                |                                                                                                            | Other Database Import             |
| 268021 | Africa / Egypt / Sharqia                                         | A/duck/Egypt/SS19/2017                            | National Laboratory for Veterinary Quality Control on Poultry production- Animal Health Research Institute | Animal Health Research Institute  |
| 268513 | Africa / Egypt / Cairo                                           | A/duck/Egypt/F446/2017                            | National Laboratory for Veterinary Quality Control on Poultry production- Animal Health Research Institute | Animal Health Research Institute  |
| 268618 | Europe / Netherlands / Provincie Noord-Holland / Den Oever       | A/Bk_swan/NL-Den Oever/16013973-002/2016          | Wageningen Bioveterinary Research                                                                          | Wageningen Bioveterinary Research |
| 268619 | Europe / Netherlands / Provincie Noord-Holland / Slootdorp       | A/Bl_H_gull/NL-Slootdorp/16014102-002/2016        | Wageningen Bioveterinary Research                                                                          | Wageningen Bioveterinary Research |
| 268620 | Europe / Netherlands / Provincie Noord-Holland / Durgerdam       | A/Buzzard/NL-Durgerdam/16015100-004/2016          | Wageningen Bioveterinary Research                                                                          | Wageningen Bioveterinary Research |
| 268621 | Europe / Netherlands / Provincie Noord-Holland / Slootdorp       | A/C_Gull/NL-Slootdorp/16014102-003/2016           | Wageningen Bioveterinary Research                                                                          | Wageningen Bioveterinary Research |
| 268622 | Europe / Netherlands / Provincie Friesland / Abbega              | A/Ch/NL-Abbega/X16015736/2016                     | Wageningen Bioveterinary Research                                                                          | Wageningen Bioveterinary Research |
| 268623 | Europe / Netherlands / Provincie Gelderland / Boven Leeuwen      | A/Ch/NL-Boven Leeuwen/16016151-006-010/2016       | Wageningen Bioveterinary Research                                                                          | Wageningen Bioveterinary Research |
| 268624 | Europe / Netherlands / Provincie Noord-Holland / Den Oever       | A/Ch/NL-Den Oever/16014231-001/2016               | Wageningen Bioveterinary Research                                                                          | Wageningen Bioveterinary Research |
| 268625 | Europe / Netherlands / Provincie Friesland / Hiaure              | A/Ch/NL-Hiaure/16016112-001-005/2016              | Wageningen Bioveterinary Research                                                                          | Wageningen Bioveterinary Research |
| 268626 | Europe / Netherlands / Provincie Utrecht / Gemeente Rhenen       | A/Ch/NL-Rhenen/16016141-006/2016                  | Wageningen Bioveterinary Research                                                                          | Wageningen Bioveterinary Research |
| 268627 | Europe / Netherlands / South Holland / Gemeente Zoeterwoude      | A/Ch/NL-Zoeterwoude/16016484-021-025/2016         | Wageningen Bioveterinary Research                                                                          | Wageningen Bioveterinary Research |
| 268628 | Europe / Netherlands / Provincie Noord-Holland / Oostwoud        | A/Crow/NL-Oostwoud/16015372-004/2016              | Wageningen Bioveterinary Research                                                                          | Wageningen Bioveterinary Research |
| 268629 | Europe / Netherlands / Provincie Flevoland / Biddinghuizen       | A/Dk/NL-Biddinghuizen/16014829-011-015/2016       | Wageningen Bioveterinary Research                                                                          | Wageningen Bioveterinary Research |
| 268630 | Europe / Netherlands / Provincie Flevoland / Biddinghuizen       | A/Dk/NL-Biddinghuizen/16015083-016-020/2016       | Wageningen Bioveterinary Research                                                                          | Wageningen Bioveterinary Research |
| 268631 | Europe / Netherlands / Provincie Flevoland / Biddinghuizen       | A/Dk/NL-Biddinghuizen/16015145-021-025/2016       | Wageningen Bioveterinary Research                                                                          | Wageningen Bioveterinary Research |
| 268632 | Europe / Netherlands / Provincie Overijssel / Kamperveen         | A/Dk/NL-Kamperveen/16016104-001-005/2016          | Wageningen Bioveterinary Research                                                                          | Wageningen Bioveterinary Research |
| 268633 | Europe / Netherlands / South Holland / Gemeente Rotterdam        | A/Dk/NL-Rotterdam/16014008-001-005/2016           | Wageningen Bioveterinary Research                                                                          | Wageningen Bioveterinary Research |
| 268634 | Europe / Netherlands / South Holland / Stolwijk                  | A/Dk/NL-Stolwijk/16016291-016-020/2016            | Wageningen Bioveterinary Research                                                                          | Wageningen Bioveterinary Research |
| 268635 | Europe / Netherlands / Provincie Friesland / Akkrum              | A/Eur_Wig/NL-Akkrum/16015817-003/2016             | Wageningen Bioveterinary Research                                                                          | Wageningen Bioveterinary Research |
| 268636 | Europe / Netherlands / Provincie Noord-Holland / De Waal (Texel) | A/Eur_Wig/NL-De Waal (Texel)/16014891-003/2016    | Wageningen Bioveterinary Research                                                                          | Wageningen Bioveterinary Research |
| 268637 | Europe / Netherlands / Provincie Noord-Holland / De Waal (Texel) | A/Eur_Wig/NL-De Waal (Texel)/16014891-004/2016    | Wageningen Bioveterinary Research                                                                          | Wageningen Bioveterinary Research |
| 268638 | Europe / Netherlands / Provincie Groningen / Drieborg (Dollard)  | A/Eur_Wig/NL-Drieborg (Dollard)/16015513-001/2016 | Wageningen Bioveterinary Research                                                                          | Wageningen Bioveterinary Research |
| 268639 | Europe / Netherlands / Provincie Groningen / Enumatil-Groningen  | A/Eur_Wig/NL-Enumatil-Groningen/16015704-001/2016 | Wageningen Bioveterinary Research                                                                          | Wageningen Bioveterinary Research |
| 268640 | Europe / Netherlands / Provincie Friesland / Ferwert             | A/Eur_Wig/NL-Ferwert/16015273-002/2016            | Wageningen Bioveterinary Research                                                                          | Wageningen Bioveterinary Research |
| 268641 | Europe / Netherlands / South Holland / Gemeente Gouda            | A/Eur_Wig/NL-Gouda/16015824-001/2016              | Wageningen Bioveterinary Research                                                                          | Wageningen Bioveterinary Research |
| 268642 | Europe / Netherlands / Provincie Friesland / Greonterp           | A/Eur_Wig/NL-Greonterp/16015653-001/2016          | Wageningen Bioveterinary Research                                                                          | Wageningen Bioveterinary Research |
| 268643 | Europe / Netherlands / Provincie Groningen                       | A/Eur_Wig/NL-Groningen/16015376-003/2016          | Wageningen Bioveterinary Research                                                                          | Wageningen Bioveterinary Research |

|        |                                                                    |                                                         |                                   |                                   |
|--------|--------------------------------------------------------------------|---------------------------------------------------------|-----------------------------------|-----------------------------------|
|        | / Gemeente Groningen                                               |                                                         |                                   |                                   |
| 268644 | Europe / Netherlands / Provincie Friesland / Gemeente Leeuwarden   | A/Eur_Wig/NL-Leeuwarden/16015699-002/2016               | Wageningen Bioveterinary Research | Wageningen Bioveterinary Research |
| 268645 | Europe / Netherlands / South Holland / Leidschendam                | A/Eur_Wig/NL-Leidschendam/16015697-007/2016             | Wageningen Bioveterinary Research | Wageningen Bioveterinary Research |
| 268646 | Europe / Netherlands / South Holland / Gemeente Reeuwijk           | A/Eur_Wig/NL-Reeuwijk/16015903-003/2016                 | Wageningen Bioveterinary Research | Wageningen Bioveterinary Research |
| 268647 | Europe / Netherlands / Provincie Friesland / Gemeente Terschelling | A/Eur_Wig/NL-Terschelling/16015692-010/2016             | Wageningen Bioveterinary Research | Wageningen Bioveterinary Research |
| 268648 | Europe / Netherlands / Provincie Utrecht / Gemeente Vianen         | A/Eur_Wig/NL-Vianen/16015917-006/2016                   | Wageningen Bioveterinary Research | Wageningen Bioveterinary Research |
| 268649 | Europe / Netherlands / Provincie Friesland / Walterswald           | A/Eur_Wig/NL-Walterswald/16015923-003/2016              | Wageningen Bioveterinary Research | Wageningen Bioveterinary Research |
| 268650 | Europe / Netherlands / Provincie Noord-Holland / West Grafdijk     | A/Eur_Wig/NL-West Grafdijk/16015746-003/2016            | Wageningen Bioveterinary Research | Wageningen Bioveterinary Research |
| 268651 | Europe / Netherlands / Provincie Noord-Holland / Wormer            | A/Eur_Wig/NL-Wormer/16016143-002/2016                   | Wageningen Bioveterinary Research | Wageningen Bioveterinary Research |
| 268652 | Europe / Netherlands / South Holland / Gemeente Zoeterwoude        | A/Eur_Wig/NL-Zoeterwoude/16015702-010/2016              | Wageningen Bioveterinary Research | Wageningen Bioveterinary Research |
| 268653 | Europe / Netherlands / Provincie Overijssel / Gemeente Zwolle      | A/Eur_Wig/NL-Zwolle/16015820-002/2016                   | Wageningen Bioveterinary Research | Wageningen Bioveterinary Research |
| 268654 | Europe / Netherlands / Provincie Noord-Holland / Monnickendam      | A/G_c_grebe/NL-Monnickendam/16013865-009-010/2016       | Wageningen Bioveterinary Research | Wageningen Bioveterinary Research |
| 268655 | Europe / Netherlands / Provincie Flevoland / Roggebotsluis         | A/Go/NL-Roggebotsluis/16014462-010/2016                 | Wageningen Bioveterinary Research | Wageningen Bioveterinary Research |
| 268656 | Europe / Netherlands / Provincie Noord-Holland / Slootdorp         | A/Gr_bk_bd_gull/NL-Slootdorp/16014102-005/2016          | Wageningen Bioveterinary Research | Wageningen Bioveterinary Research |
| 268657 | Europe / Netherlands / South Holland / Groot-Ammers                | A/Grey_Go/NL-Groot-Ammers/16015901-012/2016             | Wageningen Bioveterinary Research | Wageningen Bioveterinary Research |
| 268658 | Europe / Netherlands / Marker Wadden                               | A/Gull/NL-Marker Wadden/16014466-020/2016               | Wageningen Bioveterinary Research | Wageningen Bioveterinary Research |
| 268659 | Europe / Netherlands / Marker Wadden                               | A/Gull1/NL-Marker Wadden/16014466-011/2016              | Wageningen Bioveterinary Research | Wageningen Bioveterinary Research |
| 268660 | Europe / Netherlands / Marker Wadden                               | A/Gull10/NL-Marker Wadden/16014466-014/2016             | Wageningen Bioveterinary Research | Wageningen Bioveterinary Research |
| 268661 | Europe / Netherlands                                               | A/L-bl-ba-gull/NL-Sovon/16014324-014/2016               | Wageningen Bioveterinary Research | Wageningen Bioveterinary Research |
| 268662 | Europe / Netherlands / Provincie Flevoland / Roggebotsluis         | A/M_Swan/NL-Roggebotsluis/16014462-019/2016             | Wageningen Bioveterinary Research | Wageningen Bioveterinary Research |
| 268663 | Europe / Netherlands / Provincie Noord-Holland / Edam-Volendam     | A/Magpie/NL-Volendam/16014331-002/2016                  | Wageningen Bioveterinary Research | Wageningen Bioveterinary Research |
| 268664 | Europe / Netherlands / Provincie Overijssel / IJsselmuiden         | A/Mal/NL-IJsselmuiden/16015448-002/2016                 | Wageningen Bioveterinary Research | Wageningen Bioveterinary Research |
| 268665 | Europe / Netherlands / Provincie Overijssel / Mastenbroek          | A/Mal/NL-Mastenbroek/16015378-002/2016                  | Wageningen Bioveterinary Research | Wageningen Bioveterinary Research |
| 268666 | Europe / Netherlands / Provincie Zeeland / Vrouwenpolder           | A/P_falcon/NL-Vrouwenpolder (Zeeland)/16015510-001/2016 | Wageningen Bioveterinary Research | Wageningen Bioveterinary Research |
| 268667 | Europe / Netherlands / Provincie Drenthe / Gemeente Assen          | A/Sea_eagle/NL-Assen/16015398-002/2016                  | Wageningen Bioveterinary Research | Wageningen Bioveterinary Research |
| 268668 | Europe / Netherlands / Provincie Flevoland / Almeerder Zand        | A/T_Dk/NL-Almeerder Zand/16014341-003/2016              | Wageningen Bioveterinary Research | Wageningen Bioveterinary Research |
| 268669 | Europe / Netherlands / Provincie Noord-Holland / Monnickendam      | A/T_Dk/NL-Monnickendam/16013865-006-008/2016            | Wageningen Bioveterinary Research | Wageningen Bioveterinary Research |
| 268670 | Europe / Netherlands / Provincie Flevoland / Roggebotsluis         | A/T_Dk/NL-Roggebotsluis/16014462-015/2016               | Wageningen Bioveterinary Research | Wageningen Bioveterinary Research |

|        |                                                                      |                                                |                                                                                                      |                                                               |
|--------|----------------------------------------------------------------------|------------------------------------------------|------------------------------------------------------------------------------------------------------|---------------------------------------------------------------|
| 268671 | Europe / Netherlands / South Holland / Gemeente Rotterdam            | A/T_Dk/NL-Rotterdam/16014155-001/2016          | Wageningen Bioveterinary Research                                                                    | Wageningen Bioveterinary Research                             |
| 268672 | Europe / Netherlands / North Brabant / Gemeente Werkendam            | A/T_Dk/NL-Werkendam/16014159-002/2016          | Wageningen Bioveterinary Research                                                                    | Wageningen Bioveterinary Research                             |
| 268673 | Europe / Netherlands / North Brabant / Gemeente Werkendam            | A/T_Dk/NL-Werkendam/16014159-003/2016          | Wageningen Bioveterinary Research                                                                    | Wageningen Bioveterinary Research                             |
| 268674 | Europe / Netherlands / Provincie Flevoland / Gemeente Zeewolde       | A/T_Dk/NL-Zeewolde/16013976-001/2016           | Wageningen Bioveterinary Research                                                                    | Wageningen Bioveterinary Research                             |
| 268675 | Europe / Netherlands / Provincie Flevoland / Gemeente Zeewolde       | A/T_Dk/NL-Zeewolde/16013976-001-003/2016       | Wageningen Bioveterinary Research                                                                    | Wageningen Bioveterinary Research                             |
| 268676 | Europe / Netherlands / Provincie Flevoland / Gemeente Zeewolde       | A/T_Dk/NL-Zeewolde/16013976-004/2016           | Wageningen Bioveterinary Research                                                                    | Wageningen Bioveterinary Research                             |
| 268677 | Europe / Netherlands / Provincie Flevoland / Gemeente Zeewolde       | A/T_Dk/NL-Zeewolde/16013976-004-006/2016       | Wageningen Bioveterinary Research                                                                    | Wageningen Bioveterinary Research                             |
| 268678 | Europe / Netherlands / Provincie Flevoland / Gemeente Zeewolde       | A/T_Dk/NL-Zeewolde/16013976-005/2016           | Wageningen Bioveterinary Research                                                                    | Wageningen Bioveterinary Research                             |
| 268679 | Europe / Netherlands / Provincie Flevoland / Gemeente Zeewolde       | A/T_Dk/NL-Zeewolde/16013976-006/2016           | Wageningen Bioveterinary Research                                                                    | Wageningen Bioveterinary Research                             |
| 268680 | Europe / Netherlands / Provincie Noord-Holland / Zuidoost Beemster   | A/T_Dk/NL-Zuidoost Beemster/16014148-002/2016  | Wageningen Bioveterinary Research                                                                    | Wageningen Bioveterinary Research                             |
| 268681 | Europe / Netherlands / Provincie Noord-Holland / Zuidoost Beemster   | A/T_Dk/NL-Zuidoost Beemster/16014148-009/2016  | Wageningen Bioveterinary Research                                                                    | Wageningen Bioveterinary Research                             |
| 268682 | Europe / Netherlands / Provincie Friesland / Ferwert                 | A/Teal/NL-Ferwert/16015273-013/2016            | Wageningen Bioveterinary Research                                                                    | Wageningen Bioveterinary Research                             |
| 268930 | Europe / Czech Republic / South Moravian Region / Mesto Brno         | A/goose/Czech Republic/136-17_1/2017 (H5N8)    | State Veterinary Institute Prague                                                                    | State Veterinary Institute Prague                             |
| 268940 | Europe / Czech Republic / Jihocesky Kraj / Okres Ceske Budejovice    | A/mute swan/Czech Republic/1058-17/2017 (H5N8) | State Veterinary Institute Prague                                                                    | State Veterinary Institute Prague                             |
| 268941 | Europe / Czech Republic / Jihocesky Kraj / Okres Ceske Budejovice    | A/mute swan/Czech Republic/1060-17/2017 (H5N8) | State Veterinary Institute Prague                                                                    | State Veterinary Institute Prague                             |
| 268947 | Europe / Czech Republic / Jihocesky Kraj / Okres Strakonice / Blatná | A/mallard/Czech Republic/1219-17_1/2017 (H5N8) | State Veterinary Institute Prague                                                                    | State Veterinary Institute Prague                             |
| 271704 | Europe / Hungary / Bacs-Kiskun                                       | A/Goose/Hungary/17261/2017                     | National Food Chain Safety Office Veterinary Diagnostic Directorate Laboratory for Molecular Biology | Central Agricultural Office Veterinary Diagnostic Directorate |
| 271705 | Europe / Hungary / Bacs-Kiskun                                       | A/Goose/Hungary/15729/2017                     | National Food Chain Safety Office Veterinary Diagnostic Directorate Laboratory for Molecular Biology | Central Agricultural Office Veterinary Diagnostic Directorate |
| 271706 | Europe / Hungary / Bacs-Kiskun                                       | A/Goose/Hungary/17051/2017                     | National Food Chain Safety Office Veterinary Diagnostic Directorate Laboratory for Molecular Biology | Central Agricultural Office Veterinary Diagnostic Directorate |
| 271707 | Europe / Hungary / Bacs-Kiskun                                       | A/Goose/Hungary/17580/2017                     | National Food Chain Safety Office Veterinary Diagnostic Directorate Laboratory for Molecular Biology | Central Agricultural Office Veterinary Diagnostic Directorate |
| 271708 | Europe / Hungary / Bacs-Kiskun                                       | A/Goose/Hungary/17985/2017                     | National Food Chain Safety Office Veterinary Diagnostic Directorate Laboratory for Molecular Biology | Central Agricultural Office Veterinary Diagnostic Directorate |
| 271709 | Europe / Hungary / Bacs-Kiskun                                       | A/Goose/Hungary/59763/2016                     | National Food Chain Safety Office Veterinary Diagnostic Directorate Laboratory for Molecular Biology | Central Agricultural Office Veterinary Diagnostic Directorate |
| 271710 | Europe / Hungary / Bacs-Kiskun                                       | A/Mulard_duck/Hungary/60369/2016               | National Food Chain Safety Office Veterinary Diagnostic Directorate Laboratory for Molecular Biology | Central Agricultural Office Veterinary Diagnostic Directorate |
| 271711 | Europe / Hungary / Csongrad megye / Csongrad                         | A/Mulard_duck/Hungary/62902/2016               | National Food Chain Safety Office Veterinary Diagnostic Directorate Laboratory for Molecular Biology | Central Agricultural Office Veterinary Diagnostic Directorate |
| 271712 | Europe / Hungary / Bacs-Kiskun                                       | A/Goose/Hungary/63743/2016                     | National Food Chain Safety Office Veterinary Diagnostic Directorate Laboratory for Molecular Biology | Central Agricultural Office Veterinary Diagnostic Directorate |
| 271713 | Europe / Hungary / Bacs-Kiskun                                       | A/Goose/Hungary/64909/2016                     | National Food Chain Safety Office Veterinary Diagnostic Directorate Laboratory for Molecular Biology | Central Agricultural Office Veterinary Diagnostic Directorate |

|        |                                                                     |                                                 |                                                                                                      |                                                               |
|--------|---------------------------------------------------------------------|-------------------------------------------------|------------------------------------------------------------------------------------------------------|---------------------------------------------------------------|
| 271714 | Europe / Hungary / Bacs-Kiskun                                      | A/Mulard_duck/Hungary/59163/2016                | National Food Chain Safety Office Veterinary Diagnostic Directorate Laboratory for Molecular Biology | Central Agricultural Office Veterinary Diagnostic Directorate |
| 272859 | Asia / Korea, Republic of                                           | A/grey heron/W779/2017                          |                                                                                                      | Other Database Import                                         |
| 273846 | Europe / Italy / Emilia-Romagna / Province of Bologna / Mordano     | A/chicken/Italy/17VIR3078/2017                  | Istituto Zooprofilattico Sperimentale Delle Veneziae                                                 | Istituto Zooprofilattico Sperimentale Delle Veneziae          |
| 273847 | Europe / Italy / Veneto / Province of Verona / Albaredo d'Adige     | A/turkey/Italy/17VIR5878-3/2017                 | Istituto Zooprofilattico Sperimentale Delle Veneziae                                                 | Istituto Zooprofilattico Sperimentale Delle Veneziae          |
| 274858 | Europe / Russian Federation / Kaliningrad Oblast                    | A/mute swan/Kaliningrad/132/2017                |                                                                                                      | State Research Center of Virology and Biotechnology (VECTOR)  |
| 275283 | Europe / Russian Federation / Moscow Oblast                         | A/chicken/Shcholkovo/47/2017                    |                                                                                                      | State Research Center of Virology and Biotechnology (VECTOR)  |
| 275287 | Europe / Russian Federation / Rostov Oblast                         | A/chicken/Rostov-on-Don/44/2017                 |                                                                                                      | State Research Center of Virology and Biotechnology (VECTOR)  |
| 275288 | Europe / Russian Federation / Republic of Tatarstan                 | A/chicken/Tatarstan/88/2017                     |                                                                                                      | State Research Center of Virology and Biotechnology (VECTOR)  |
| 277134 | Europe / Germany / Saxony-Anhalt / Kreis Mansfeld-Südharz           | A/swan/Germany-ST/AR3396-L02292/2017            |                                                                                                      | Friedrich-Loeffler-Institut                                   |
| 277135 | Europe / Germany / Saxony-Anhalt / Kreis Mansfeld-Südharz           | A/swan/Germany-ST/AR3397-L02293/2017            |                                                                                                      | Friedrich-Loeffler-Institut                                   |
| 277137 | Europe / Germany / Saxony-Anhalt / Kreis Mansfeld-Südharz           | A/swan/Germany-ST/AR1166-L02295/2017            |                                                                                                      | Friedrich-Loeffler-Institut                                   |
| 280672 | Europe / Germany / Saxony-Anhalt / Kreis Mansfeld-Südharz           | A/buzzard/Germany-ST/AR1959-L02305/2017         |                                                                                                      | Friedrich-Loeffler-Institut                                   |
| 280674 | Europe / Switzerland / Yverdon-les-Bains                            | A/mute_swan/Switzerland/V0244.2-L02307/2017     | Institut für Virologie und Immunologie - Bundesamt für Lebensmittelsicherheit und Veterinärwesen     | Friedrich-Loeffler-Institut                                   |
| 282133 | Europe / Czech Republic / South Moravian Region / Okres Brno-Venkov | A/turkey/Czech Republic/38-17_1/2017 (H5N8)     | State Veterinary Institute Prague                                                                    | State Veterinary Institute Prague                             |
| 282141 | Europe / Italy / Lombardy / Province of Bergamo / Mozzanica         | A/swan/Italy/17VIR7064-1/2017                   | Istituto Zooprofilattico Sperimentale Delle Veneziae                                                 | Istituto Zooprofilattico Sperimentale Delle Veneziae          |
| 282143 | Europe / Italy / Lombardy / Province of Pavia / Chignolo Po         | A/goose/Italy/17VIR6358-3/2017                  | Istituto Zooprofilattico Sperimentale Delle Veneziae                                                 | Istituto Zooprofilattico Sperimentale Delle Veneziae          |
| 283129 | Europe / Czech Republic / Olomoucky Kraj / Okres Prerov / Lověšice  | A/chicken/Czech Republic/988-17/2017 (H5N8)     | State Veterinary Institute Prague                                                                    | State Veterinary Institute Prague                             |
| 284004 | Africa / South Africa / Province of the Western Cape                | A/Chicken/South_Africa/S2017/08_0336_P3/2017    | Western Cape Provincial Veterinary Laboratory                                                        | National Institute for Communicable Diseases                  |
| 285601 | Africa / South Africa / Province of the Western Cape                | A/Geese/South_Africa/S2017/09_0065_P1/2017      | Western Cape Provincial Veterinary Laboratory                                                        | National Institute for Communicable Diseases                  |
| 285602 | Africa / South Africa / Province of the Western Cape                | A/Geese/South_Africa/S2017/09_0065_P2/2017      | Western Cape Provincial Veterinary Laboratory                                                        | National Institute for Communicable Diseases                  |
| 285604 | Africa / South Africa / Province of the Western Cape                | A/Ostrich/South_Africa/S2017/08_0046_P3/2017    | Western Cape Provincial Veterinary Laboratory                                                        | National Institute for Communicable Diseases                  |
| 285606 | Africa / South Africa / Province of the Western Cape                | A/Duck/South_Africa/S2017/08_0340_P1/2017       | Western Cape Provincial Veterinary Laboratory                                                        | National Institute for Communicable Diseases                  |
| 285624 | Africa / South Africa / Province of the Western Cape                | A/Chicken/South_Africa/S2017/09_0050_56/2017    | Western Cape Provincial Veterinary Laboratory                                                        | National Institute for Communicable Diseases                  |
| 285648 | Africa / South Africa / Province of the Western Cape                | A/Geese/South_Africa/S2017/09_0055_P1/2017      | Western Cape Provincial Veterinary Laboratory                                                        | National Institute for Communicable Diseases                  |
| 285649 | Africa / South Africa / Province of the Western Cape                | A/Chicken/South_Africa/S2017/09_0184_63/2017    | Western Cape Provincial Veterinary Laboratory                                                        | National Institute for Communicable Diseases                  |
| 285650 | Africa / South Africa / Province of the Western Cape                | A/Ostrich/South_Africa/S2017/08_0046_AF/2017    | Western Cape Provincial Veterinary Laboratory                                                        | National Institute for Communicable Diseases                  |
| 285651 | Africa / South Africa / Province of the Western Cape                | A/Guineafowl/South_Africa/S2017/08_0190_9/2017  | Western Cape Provincial Veterinary Laboratory                                                        | National Institute for Communicable Diseases                  |
| 285652 | Africa / South Africa / Province of the Western Cape                | A/Guineafowl/South_Africa/S2017/08_0243_P2/2017 | Western Cape Provincial Veterinary Laboratory                                                        | National Institute for Communicable Diseases                  |

|        |                                                                                      |                                              |                                               |                                              |
|--------|--------------------------------------------------------------------------------------|----------------------------------------------|-----------------------------------------------|----------------------------------------------|
|        | Western Cape                                                                         |                                              |                                               |                                              |
| 285655 | Africa / South Africa / Province of the Western Cape                                 | A/Geese/South_Africa/S2017/08_0558_P1/2017   | Western Cape Provincial Veterinary Laboratory | National Institute for Communicable Diseases |
| 285658 | Africa / South Africa / Province of the Western Cape                                 | A/Chicken/South_Africa/S2017/08_0561_P1/2017 | Western Cape Provincial Veterinary Laboratory | National Institute for Communicable Diseases |
| 287564 | Europe / Netherlands / North Brabant / Gemeente Werkendam / Werkendam                | A/T_Dk/NL-Werkendam/16014159-001/2016        | Wageningen Bioveterinary Research             | Wageningen Bioveterinary Research            |
| 287565 | Europe / Netherlands / Provincie Groningen / Gemeente Groningen / Groningen          | A/M_Swan/NL-Groningen/16015826-001/2016      | Wageningen Bioveterinary Research             | Wageningen Bioveterinary Research            |
| 287800 | Asia / Taiwan                                                                        | A/spoonbill/Taiwan/DB645/2017                |                                               | Animal Health Research Institute             |
| 287906 | Europe / Netherlands / Provincie Flevoland / Gemeente Dronten / Biddinghuizen        | A/Duck/Netherlands/17017236-001-005/2017     | Wageningen Bioveterinary Research             | Wageningen Bioveterinary Research            |
| 287907 | Europe / Netherlands / Provincie Flevoland / Gemeente Dronten / Biddinghuizen        | A/Duck/Netherlands/17017237-001-005/2017     | Wageningen Bioveterinary Research             | Wageningen Bioveterinary Research            |
| 288362 | Europe / Greece                                                                      | A/chicken/Greece/39_2017/2017                | Thessalonica Veterinary Centre (TVC)          | Animal and Plant Health Agency (APHA)        |
| 288363 | Europe / Greece                                                                      | A/chicken/Greece/39_2017a/2017               | Thessalonica Veterinary Centre (TVC)          | Animal and Plant Health Agency (APHA)        |
| 288364 | Europe / Greece                                                                      | A/chicken/Greece/39_2017b/2017               | Thessalonica Veterinary Centre (TVC)          | Animal and Plant Health Agency (APHA)        |
| 288409 | Europe / Netherlands / Provincie Gelderland / Hulshorst                              | A/Mute Swan/Netherlands/17017367-012/2017    | Wageningen Bioveterinary Research             | Wageningen Bioveterinary Research            |
| 288410 | Europe / Netherlands / Provincie Gelderland / Gemeente Elburg                        | A/Mute Swan/Netherlands/17017377-001/2017    | Wageningen Bioveterinary Research             | Wageningen Bioveterinary Research            |
| 288412 | Europe / Netherlands / Provincie Gelderland / Hulshorst                              | A/Tufted Duck/Netherlands/17017367-007/2017  | Wageningen Bioveterinary Research             | Wageningen Bioveterinary Research            |
| 288436 | Asia / Korea, Republic of / Jeju-teukbyeoljachido                                    | A/mallard/Korea/Jeju-H24/2017                | Animal and Plant Quarantine Agency (O-2144)   | Animal and Plant Quarantine Agency (S-2145)  |
| 288437 | Asia / Korea, Republic of / Jeollabuk-do                                             | A/duck/Korea/HD1/2017                        | Animal and Plant Quarantine Agency (O-2144)   | Animal and Plant Quarantine Agency (S-2145)  |
| 288438 | Asia / Korea, Republic of / Jeollabuk-do                                             | A/chicken/Korea/Gunsan/2017                  | Animal and Plant Quarantine Agency (O-2144)   | Animal and Plant Quarantine Agency (S-2145)  |
| 288734 | Europe / Germany / North Rhine-Westphalia / Regierungsbezirk Dusseldorf / Düsseldorf | A/mute swan/Germany-NW/AR108/2017            |                                               | Friedrich-Loeffler-Institut                  |
| 288736 | Europe / Germany / Rhineland-Palatinate / Zell                                       | A/mute swan/Germany-RP/AR416/2017            |                                               | Friedrich-Loeffler-Institut                  |
| 288737 | Europe / Germany / Hamburg                                                           | A/greylag goose/Germany-HH/AR477/2017        |                                               | Friedrich-Loeffler-Institut                  |
| 288746 | Europe / Germany / Bavaria / Lower Franconia / Gemünden                              | A/mute swan/Germany-BY/AR857/2017            |                                               | Friedrich-Loeffler-Institut                  |
| 288747 | Europe / Germany / Rhineland-Palatinate / Bad Breisig, Kreis Bad Neuenahr-Ahrweiler  | A/tufted duck/Germany-RP/AR1181/2017         |                                               | Friedrich-Loeffler-Institut                  |
| 289068 | Europe / Germany / Hessen / Regierungsbezirk Giessen / Gießem                        | A/great egret/Germany-HE/AR1208/2017         |                                               | Friedrich-Loeffler-Institut                  |
| 289173 | Asia / Japan / Shimane                                                               | A/mute swan/Shimane/3211A001/2017            |                                               | Other Database Import                        |
| 289713 | Europe / Netherlands / Provincie Noord-Holland / De Kreupel                          | A/Great Black-backed Gull/Netherlands/1/2017 | Erasmus Medical Center                        | Erasmus Medical Center                       |
| 289714 | Europe / Netherlands / Provincie Noord-Holland / De Kreupel                          | A/Black-headed Gull/Netherlands/29/2017      | Erasmus Medical Center                        | Erasmus Medical Center                       |
| 291103 | Europe / Germany / Hessen / Nentershausen, Kreis Hersfeld Rothenburg                 | A/mute swan/Germany_HE/AR195/2017            |                                               | Friedrich-Loeffler-Institut                  |

|        |                                                                      |                                                 |                                                                                                  |                                                              |
|--------|----------------------------------------------------------------------|-------------------------------------------------|--------------------------------------------------------------------------------------------------|--------------------------------------------------------------|
| 291109 | Europe / Germany / Bavaria                                           | A/common_pochard/Germany-BY/AR09-18-L02421/2017 |                                                                                                  | Friedrich-Loeffler-Institut                                  |
| 291110 | Europe / Switzerland / Erlach                                        | A/mute_swan/Switzerland/V361-L02422/2017        | Institut für Virologie und Immunologie - Bundesamt für Lebensmittelsicherheit und Veterinärwesen | Friedrich-Loeffler-Institut                                  |
| 292223 | Europe / United Kingdom / Dorset / Abbotsbury                        | A/mute_swan/England/AVP_18_001986/2017          | Animal and Plant Health Agency (APHA)                                                            | Animal and Plant Health Agency (APHA)                        |
| 292224 | Europe / United Kingdom / Dorset / Abbotsbury                        | A/pochard_duck/England/AVP_18_003254/2018       | Animal and Plant Health Agency (APHA)                                                            | Animal and Plant Health Agency (APHA)                        |
| 292225 | Europe / United Kingdom / Dorset / Abbotsbury                        | A/canada_goose/England/AV58_18OPp oolEP1/2018   | Animal and Plant Health Agency (APHA)                                                            | Animal and Plant Health Agency (APHA)                        |
| 295027 | Europe / Russian Federation / Kostroma Oblast                        | A/chicken/Kostroma/1718/2017                    |                                                                                                  | State Research Center of Virology and Biotechnology (VECTOR) |
| 297234 | Europe / Russian Federation / Rostov Oblast                          | A/chicken/Rostov-on-Don/1321/2017               |                                                                                                  | State Research Center of Virology and Biotechnology (VECTOR) |
| 297235 | Europe / Russian Federation / Rostov Oblast                          | A/chicken/Rostov-on-Don/1598/2017               |                                                                                                  | State Research Center of Virology and Biotechnology (VECTOR) |
| 297388 | Europe / Macedonia, the former Yugoslav Republic of / Opstina Struga | A/chicken/Republic of Macedonia/466/2017        | Faculty of Veterinary Medicine Skopje                                                            | Croatian Veterinary Institute                                |
| 297463 | Europe / Russian Federation / Kostroma Oblast                        | A/chicken/Kostroma/1717/2017                    |                                                                                                  | State Research Center of Virology and Biotechnology (VECTOR) |
| 297464 | Europe / Russian Federation / Kostroma Oblast                        | A/chicken/Kostroma/1719/2017                    |                                                                                                  | State Research Center of Virology and Biotechnology (VECTOR) |
| 297465 | Europe / Russian Federation / Kostroma Oblast                        | A/chicken/Kostroma/1720/2017                    |                                                                                                  | State Research Center of Virology and Biotechnology (VECTOR) |
| 297466 | Europe / Russian Federation / Kostroma Oblast                        | A/chicken/Kostroma/1721/2017                    |                                                                                                  | State Research Center of Virology and Biotechnology (VECTOR) |
| 300547 | Europe / Ukraine                                                     | A/White-fronted Goose/AN/1-15-12/2016           | NSC Institute of Experimental and Clinical Veterinary Medicine                                   | Friedrich-Loeffler-Institut                                  |
| 300548 | Europe / Ukraine / Kherson Oblast                                    | A/Ruddy Shelduck/AN/2-14-12/2016                | NSC Institute of Experimental and Clinical Veterinary Medicine                                   | Friedrich-Loeffler-Institut                                  |
| 300562 | Europe / Ukraine / Kherson Oblast                                    | A/Environmental (EM) /AN/2/17                   | NSC Institute of Experimental and Clinical Veterinary Medicine                                   | Friedrich-Loeffler-Institut                                  |
| 300686 | Europe / Poland / Lubusz Voivodeship                                 | A/turkey/Poland/63/2016                         | National Veterinary Research Institut Poland, PIWet-PIB                                          | National Veterinary Research Institut Poland, PIWet-PIB      |
| 300687 | Europe / Poland / Lesser Poland Voivodeship                          | A/chicken/Poland/34/2017                        | National Veterinary Research Institut Poland, PIWet-PIB                                          | National Veterinary Research Institut Poland, PIWet-PIB      |
| 300693 | Europe / Poland / Greater Poland Voivodeship                         | A/domestic_duck/Poland/47/2017                  | National Veterinary Research Institut Poland, PIWet-PIB                                          | National Veterinary Research Institut Poland, PIWet-PIB      |
| 300698 | Europe / Poland / Masovian Voivodeship                               | A/turkey/Poland/54/2017                         | National Veterinary Research Institut Poland, PIWet-PIB                                          | National Veterinary Research Institut Poland, PIWet-PIB      |
| 300699 | Europe / Poland / Greater Poland Voivodeship                         | A/domestic_goose/Poland/69/2017                 | National Veterinary Research Institut Poland, PIWet-PIB                                          | National Veterinary Research Institut Poland, PIWet-PIB      |
| 300700 | Europe / Poland / Warmian-Masurian Voivodeship                       | A/turkey/Poland/72/2017                         | National Veterinary Research Institut Poland, PIWet-PIB                                          | National Veterinary Research Institut Poland, PIWet-PIB      |
| 300701 | Europe / Poland / Greater Poland Voivodeship                         | A/turkey/Poland/94/2017                         | National Veterinary Research Institut Poland, PIWet-PIB                                          | National Veterinary Research Institut Poland, PIWet-PIB      |
| 300702 | Europe / Poland / Lower Silesian Voivodeship                         | A/chicken/Poland/101/2017                       | National Veterinary Research Institut Poland, PIWet-PIB                                          | National Veterinary Research Institut Poland, PIWet-PIB      |
| 300703 | Europe / Poland / Lower Silesian Voivodeship                         | A/domestic_goose/Poland/124/2017                | National Veterinary Research Institut Poland, PIWet-PIB                                          | National Veterinary Research Institut Poland, PIWet-PIB      |
| 300704 | Europe / Poland / Podlasie Voivodeship                               | A/turkey/Poland/192/2017                        | National Veterinary Research Institut Poland, PIWet-PIB                                          | National Veterinary Research Institut Poland, PIWet-PIB      |
| 300712 | Europe / Poland / Lubusz Voivodeship                                 | A/chicken/Poland/263/2017                       |                                                                                                  | National Veterinary Research Institut Poland, PIWet-PIB      |
| 300743 | Europe / Poland / West Pomeranian Voivodeship                        | A/mallard/Poland/17/2017                        |                                                                                                  | National Veterinary Research Institut Poland, PIWet-PIB      |
| 300744 | Europe / Poland / Lesser Poland Voivodeship                          | A/swan/Poland/32/2017                           |                                                                                                  | National Veterinary Research Institut Poland, PIWet-PIB      |
| 300745 | Europe / Poland / Lubusz Voivodeship                                 | A/wild duck/Poland/57/2017                      |                                                                                                  | National Veterinary Research Institut Poland, PIWet-PIB      |



|        |                                                               |                                                         |                                                                              |                                                         |
|--------|---------------------------------------------------------------|---------------------------------------------------------|------------------------------------------------------------------------------|---------------------------------------------------------|
| 300746 | Europe / Poland / Lower Silesian Voivodeship                  | A/swan/Poland/81/2017                                   |                                                                              | National Veterinary Research Institut Poland, PIWet-PIB |
| 300747 | Europe / Poland / Pomeranian Voivodeship                      | A/mute_swan/Poland/137/2017                             |                                                                              | National Veterinary Research Institut Poland, PIWet-PIB |
| 303637 | Asia / Korea, Republic of / Chungcheongnam-do / Gokgyo-cheon  | A/Mandarin_duck/Korea/K17-1887/2017                     | Avian diseases laboratory, College of Veterinary Medicine, Konkuk University | Konkuk University                                       |
| 303638 | Asia / Korea, Republic of / Chungcheongnam-do / Gokgyo-cheon  | A/Mandarin_duck/Korea/K17-1889/2017                     | Avian diseases laboratory, College of Veterinary Medicine, Konkuk University | Konkuk University                                       |
| 303639 | Asia / Korea, Republic of / Chungcheongnam-do / Gokgyo-cheon  | A/Mandarin_duck/Korea/K17-1891/2017                     | Avian diseases laboratory, College of Veterinary Medicine, Konkuk University | Konkuk University                                       |
| 303640 | Asia / Korea, Republic of / Chungcheongnam-do / Gokgyo-cheon  | A/Mandarin_duck/Korea/K17-1893/2017                     | Avian diseases laboratory, College of Veterinary Medicine, Konkuk University | Konkuk University                                       |
| 303641 | Asia / Korea, Republic of / Chungcheongnam-do / Gokgyo-cheon  | A/Mandarin_duck/Korea/K17-1894/2017                     | Avian diseases laboratory, College of Veterinary Medicine, Konkuk University | Konkuk University                                       |
| 303642 | Asia / Korea, Republic of / Chungcheongnam-do / Gokgyo-cheon  | A/Mandarin_duck/Korea/K17-1896/2017                     | Avian diseases laboratory, College of Veterinary Medicine, Konkuk University | Konkuk University                                       |
| 303643 | Asia / Korea, Republic of / Chungcheongnam-do / Gokgyo-cheon  | A/Mandarin_duck/Korea/K18-3/2018                        | Avian diseases laboratory, College of Veterinary Medicine, Konkuk University | Konkuk University                                       |
| 304701 | Europe / Germany / Hessen / Regierungsbezirk Darmstadt        | A/greylag goose/Germany-HE/AR1667/2017                  |                                                                              | Friedrich-Loeffler-Institut                             |
| 305416 | Europe / Netherlands / Provincie Overijssel / Gemeente Kampen | A/Domestic_Duck/Netherlands/EMC-2/2018                  | Erasmus Medical Center                                                       | Erasmus Medical Center                                  |
| 305417 | Europe / Netherlands / Provincie Overijssel / Gemeente Kampen | A/Domestic_Duck/Netherlands/EMC-6/2018                  | Erasmus Medical Center                                                       | Erasmus Medical Center                                  |
| 305453 | Europe / Germany / Schleswig-Holstein / Nordfriesland         | A/chicken/Germany-SH/AR163-L02542/2018                  |                                                                              | Friedrich-Loeffler-Institut                             |
| 305454 | Europe / Germany / Schleswig-Holstein / Nordfriesland         | A/chicken/Germany-SH/AR164-L02543/2018                  |                                                                              | Friedrich-Loeffler-Institut                             |
| 305455 | Europe / Germany / Schleswig-Holstein / Nordfriesland         | A/duck/Germany-SH/AR165-L02544/2018                     |                                                                              | Friedrich-Loeffler-Institut                             |
| 306989 | Europe / Germany / Schleswig-Holstein / Nordfriesland         | A/turkey/Germany-SH/AR185-L02549/2018                   |                                                                              | Friedrich-Loeffler-Institut                             |
| 308781 | Asia / Japan / Hyogo                                          | A/jungle crow/Hyogo/2803A002/2018                       |                                                                              | Other Database Import                                   |
| 308782 | Asia / Japan / Hyogo                                          | A/jungle crow/Hyogo/2803E011/2018                       |                                                                              | Other Database Import                                   |
| 308783 | Asia / Japan / Hyogo                                          | A/jungle crow/Hyogo/2803E022/2018                       |                                                                              | Other Database Import                                   |
| 308802 | Africa / Congo, the Democratic Republic of                    | A/duck/Democratic Republic of the Congo/17RS882-29/2017 |                                                                              | Other Database Import                                   |
| 308803 | Africa / Congo, the Democratic Republic of                    | A/duck/Democratic Republic of the Congo/17RS882-33/2017 |                                                                              | Other Database Import                                   |
| 308804 | Africa / Congo, the Democratic Republic of                    | A/duck/Democratic Republic of the Congo/17RS882-40/2017 |                                                                              | Other Database Import                                   |
| 308805 | Africa / Congo, the Democratic Republic of                    | A/duck/Democratic Republic of the Congo/17RS882-5/2017  |                                                                              | Other Database Import                                   |
| 309197 | Europe / Belgium                                              | A/Brahma chicken/Belgium/6153/2017                      | Sciensano                                                                    | Sciensano                                               |
| 309198 | Europe / Belgium                                              | A/Guinea fowl/Belgium/6102/2017                         | Sciensano                                                                    | Sciensano                                               |
| 312376 | Asia / Georgia / Mtkvari River, Tbilisi                       | A/Armenian Gull/Republic of Georgia/4/2017              | National Center for Disease Control and Public Health, Georgia               | Erasmus Medical Center                                  |
| 313226 | Europe / Germany / Lower Saxony / Vechta                      | A/white stork/Germany-NI/AR251/2018                     | Niedersaechsisches Landesgesundheitsamt                                      | Friedrich-Loeffler-Institut                             |
| 313227 | Europe / Germany / North Rhine-Westphalia / Herford           | A/buzzard/Germany-NRW/AR279/2018                        | Chemisches und Veterinäruntersuchungsamt Ostwestfalen-Lippe                  | Friedrich-Loeffler-Institut                             |

|        |                                                          |                                      |  |                                                              |
|--------|----------------------------------------------------------|--------------------------------------|--|--------------------------------------------------------------|
| 319652 | Asia / Japan / Shimane                                   | A/tufted duck/Shimane/3211TY001/2017 |  | Other Database Import                                        |
| 320607 | Europe / Russian Federation / Kursk Oblast               | A/chicken/Kursk/284/2018             |  | State Research Center of Virology and Biotechnology (VECTOR) |
| 320608 | Europe / Russian Federation / Kursk Oblast               | A/chicken/Kursk/526/2018             |  | State Research Center of Virology and Biotechnology (VECTOR) |
| 320657 | Europe / Russian Federation / Samara Oblast              | A/chicken/Samara/446/2018            |  | State Research Center of Virology and Biotechnology (VECTOR) |
| 320658 | Europe / Russian Federation / Samara Oblast              | A/chicken/Samara/447/2018            |  | State Research Center of Virology and Biotechnology (VECTOR) |
| 320659 | Europe / Russian Federation / Samara Oblast              | A/duck/Samara/452/2018               |  | State Research Center of Virology and Biotechnology (VECTOR) |
| 320660 | Europe / Russian Federation / Samara Oblast              | A/goose/Samara/455/2018              |  | State Research Center of Virology and Biotechnology (VECTOR) |
| 320661 | Europe / Russian Federation / Samara Oblast              | A/goose/Samara/459/2018              |  | State Research Center of Virology and Biotechnology (VECTOR) |
| 320662 | Europe / Russian Federation / Penza Oblast               | A/chicken/Penza/300/2018             |  | State Research Center of Virology and Biotechnology (VECTOR) |
| 320663 | Europe / Russian Federation / Penza Oblast               | A/chicken/Penza/301/2018             |  | State Research Center of Virology and Biotechnology (VECTOR) |
| 320664 | Europe / Russian Federation / Oryol Oblast               | A/chicken/Orel/533/2018              |  | State Research Center of Virology and Biotechnology (VECTOR) |
| 320674 | Europe / Russian Federation / Rostov Oblast              | A/chicken/Rostov-on-Don/766/2018     |  | State Research Center of Virology and Biotechnology (VECTOR) |
| 320675 | Europe / Russian Federation / Rostov Oblast              | A/turkey/Rostov-on-Don/817/2018      |  | State Research Center of Virology and Biotechnology (VECTOR) |
| 320676 | Europe / Russian Federation / Penza Oblast               | A/chicken/Penza/605/2018             |  | State Research Center of Virology and Biotechnology (VECTOR) |
| 320677 | Europe / Russian Federation / Penza Oblast               | A/chicken/Penza/607/2018             |  | State Research Center of Virology and Biotechnology (VECTOR) |
| 320678 | Europe / Russian Federation / Chuvash Republic-Chuvashia | A/chicken/Cheboksary/805/2018        |  | State Research Center of Virology and Biotechnology (VECTOR) |
| 320679 | Europe / Russian Federation / Chuvash Republic-Chuvashia | A/chicken/Cheboksary/806/2018        |  | State Research Center of Virology and Biotechnology (VECTOR) |
| 320680 | Europe / Russian Federation / Kursk Oblast               | A/chicken/Kursk/757/2018             |  | State Research Center of Virology and Biotechnology (VECTOR) |
| 320681 | Europe / Russian Federation / Kursk Oblast               | A/chicken/Kursk/760/2018             |  | State Research Center of Virology and Biotechnology (VECTOR) |
| 320682 | Europe / Russian Federation / Kursk Oblast               | A/chicken/Kursk/762/2018             |  | State Research Center of Virology and Biotechnology (VECTOR) |
| 320683 | Europe / Russian Federation / Samara Oblast              | A/goose/Samara/673/2018              |  | State Research Center of Virology and Biotechnology (VECTOR) |
| 320684 | Europe / Russian Federation / Samara Oblast              | A/goose/Samara/675/2018              |  | State Research Center of Virology and Biotechnology (VECTOR) |
| 320685 | Europe / Russian Federation / Samara Oblast              | A/chicken/Samara/679/2018            |  | State Research Center of Virology and Biotechnology (VECTOR) |
| 320953 | Europe / Russian Federation / Chuvash Republic-Chuvashia | A/chicken/Cheboksary/849/2018        |  | State Research Center of Virology and Biotechnology (VECTOR) |
| 320954 | Europe / Russian Federation / Chuvash Republic-Chuvashia | A/chicken/Cheboksary/850/2018        |  | State Research Center of Virology and Biotechnology (VECTOR) |
| 320955 | Europe / Russian Federation / Chuvash Republic-Chuvashia | A/chicken/Cheboksary/851/2018        |  | State Research Center of Virology and Biotechnology (VECTOR) |
| 320956 | Europe / Russian Federation / Chuvash Republic-Chuvashia | A/chicken/Cheboksary/853/2018        |  | State Research Center of Virology and Biotechnology (VECTOR) |
| 320957 | Europe / Russian Federation / Chuvash Republic-Chuvashia | A/chicken/Cheboksary/854/2018        |  | State Research Center of Virology and Biotechnology (VECTOR) |
| 320958 | Europe / Russian Federation / Republic of Tatarstan      | A/chicken/Tatarstan/7/2018           |  | State Research Center of Virology and Biotechnology (VECTOR) |

|        |                                                                               |                                                  |  |                             |
|--------|-------------------------------------------------------------------------------|--------------------------------------------------|--|-----------------------------|
| 322179 | Europe / Germany /<br>Mecklenburg-<br>Vorpommern /<br>Nordwestmecklenbur<br>g | A/domestic duck/Germany-MV/AR613-<br>L02727/2018 |  | Friedrich-Loeffler-Institut |
|--------|-------------------------------------------------------------------------------|--------------------------------------------------|--|-----------------------------|

**Table S6.** Summary of data of different clades per gene segment. Based on extended dataset (ii) shown in Table S4.

| Clade        | Seg1       | Seg2       | Seg3       | Seg4-H5    | Seg5       | Seg6-N5   | Seg6-N8    | Seg7       | Seg8       |
|--------------|------------|------------|------------|------------|------------|-----------|------------|------------|------------|
| A            | 124        | 212        | 109        | 234        | 125        | 18        | 217        | 236        | 237        |
| B            | 62         | 0          | 99         | 0          | 62         | 0         | 0          | 0          | 0          |
| C            | 33         | 16         | 0          | 0          | 0          | 0         | 0          | 0          | 0          |
| D            | 17         | 6          | 14         | 0          | 17         | 0         | 0          | 0          | 0          |
| E            | 0          | 0          | 13         | 0          | 17         | 0         | 0          | 0          | 0          |
| F            | 0          | 0          | 0          | 0          | 13         | 0         | 0          | 0          | 0          |
| X-           | 0          | 2          | 2          | 0          | 0          | 0         | 0          | 0          | 0          |
| X-A          | 0          | 16         | 1          | 50         | 0          | 2         | 19         | 37         | 14         |
| X-A+B        | 0          | 0          | 0          | 0          | 3          | 0         | 0          | 0          | 0          |
| X-A+C        | 20         | 0          | 0          | 0          | 0          | 0         | 0          | 0          | 0          |
| X-B          | 1          | 0          | 16         | 0          | 0          | 0         | 0          | 0          | 0          |
| X-C          | 0          | 7          | 0          | 0          | 0          | 0         | 0          | 0          | 0          |
| X-D          | 2          | 8          | 19         | 0          | 14         | 0         | 0          | 0          | 0          |
| X-E          | 0          | 0          | 6          | 0          | 6          | 0         | 0          | 0          | 0          |
| X-F          | 0          | 0          | 0          | 0          | 7          | 0         | 0          | 0          | 0          |
| <b>total</b> | <b>259</b> | <b>267</b> | <b>279</b> | <b>284</b> | <b>264</b> | <b>20</b> | <b>236</b> | <b>273</b> | <b>251</b> |

**Table S7.** Summary of data of different clades per gene segment. Based on host species names as provided in extended dataset (ii) shown in Table S4.

| Bird                     | Dom-ans | Dom-gal | Wild-ans | Wild-ans-long | Wild-other |
|--------------------------|---------|---------|----------|---------------|------------|
| Anas penelope            |         |         |          | 18            |            |
| Anas platyrhynchos       |         |         | 3        |               |            |
| Anser anser              |         |         |          | 1             |            |
| Anser cygnoides          | 1       |         |          |               |            |
| Bar-headed goose         |         |         | 2        |               |            |
| Black-headed gull        |         |         |          |               | 3          |
| Black swan               |         |         | 2        |               |            |
| Brown-headed gull        |         |         |          |               | 2          |
| Buteo buteo              |         |         |          |               | 1          |
| Buzzard                  |         |         |          |               | 1          |
| Caspian gull             |         |         |          |               | 1          |
| Chicken                  |         | 38      |          |               |            |
| Common buzzard           |         |         |          |               | 2          |
| Common goldeneye         |         |         | 1        |               |            |
| Common gull              |         |         |          |               | 1          |
| Common teal              |         |         |          | 2             |            |
| Common tern              |         |         |          |               | 2          |
| Cormorant                |         |         |          |               | 2          |
| Crow                     |         |         |          |               | 1          |
| Cygnus atratus           |         |         | 2        |               |            |
| Cygnus olor              |         |         | 2        |               |            |
| Decoy duck               |         |         | 1        |               |            |
| Domestic duck            | 4       |         |          |               |            |
| Domestic goose           | 3       |         |          |               |            |
| Domestic turkey          |         | 1       |          |               |            |
| Duck                     | 17      |         |          |               |            |
| Egret                    |         |         |          |               | 1          |
| Eurasian wigeon          |         |         |          | 4             |            |
| Gadwall                  |         |         | 2        |               |            |
| Goose                    | 9       |         |          |               |            |
| Great black-backed gull  |         |         |          |               | 2          |
| Great black-headed gull  |         |         |          |               | 1          |
| Great crested grebe      |         |         |          |               | 3          |
| Green-winged teal        |         |         |          | 1             |            |
| Grey heron               |         |         |          |               | 3          |
| Grey lag goose           |         |         |          | 4             |            |
| Guineafowl               |         | 2       |          |               |            |
| Gull                     |         |         |          |               | 3          |
| Harris hawk              |         |         |          |               | 2          |
| Laruss chistisagus       |         |         |          |               | 1          |
| Lesser black-backed gull |         |         |          |               | 1          |
| Long-eared owl           |         |         |          |               | 1          |
| Magpie                   |         |         |          |               | 1          |
| Mallard                  |         |         | 8        |               |            |
| Mew gull                 |         |         |          |               | 1          |
| Mulard duck              | 2       |         |          |               |            |
| Mute swan                |         |         | 18       |               |            |

|                                    |    |    |    |    |    |
|------------------------------------|----|----|----|----|----|
| Painted stork                      |    |    |    |    | 1  |
| Peacock                            |    |    |    |    | 1  |
| Peregrine falcon                   |    |    |    |    | 2  |
| Pheasant                           |    | 2  |    |    |    |
| Pochard duck                       |    |    | 1  |    |    |
| Rook                               |    |    |    |    | 1  |
| Ruddy shelduck                     |    |    | 1  |    |    |
| Seaeagle                           |    |    |    |    | 1  |
| Shelduck                           |    |    | 1  |    |    |
| Spot-billed Pelican                |    |    |    |    | 1  |
| Swan                               |    |    | 3  |    |    |
| Teal                               |    |    | 2  |    |    |
| Tufted duck                        |    |    | 14 |    |    |
| Turkey                             |    | 14 |    |    |    |
| Ural owl                           |    |    |    |    | 1  |
| White-fronted goose                |    |    |    | 2  |    |
| Wigeon                             |    |    |    | 4  |    |
| Wild duck                          |    |    | 4  |    |    |
| Total no. of isolates per category | 36 | 57 | 69 | 36 | 44 |

**Table S8.** Dataset gene sequences used for IRIS analysis.

| id                                                                   | latitude   | longitude   | Collection Date | Reassortant name 1 | Reassortant name 2 | Domst atus 2 <sup>a</sup> | Domstatu s <sup>b</sup> | Reassortant colour |
|----------------------------------------------------------------------|------------|-------------|-----------------|--------------------|--------------------|---------------------------|-------------------------|--------------------|
| 224580_A_great_crested_grebe_Uvs-Nuur_Lake_341_2016_H5N8_2016-May-25 | 50,3997872 | 92,6902698  | 2016-May-25     | H5N8_0516          | CABAD8AA           | w                         | Wild-other              | lime               |
| 224704_A_Bar-headed_Goose_Qinghai_BTY1-B_2016_H5N8_2016-May-09       | 36,7599029 | 100,3497895 | 2016-May-09     | H5N8_0516          | CABAD8AA           | w                         | Wild-ans                | lime               |
| 224707_A_Bar-headed_Goose_Qinghai_BTY2-B_2016_H5N8_2016-May-12       | 36,7599029 | 100,3497895 | 2016-May-12     | H5N8_0516          | CABAD8AA           | w                         | Wild-ans                | lime               |
| 224708_A_Bar-headed_Goose_Qinghai_BTY2-LU_2016_H5N8_2016-May-12      | 36,7599029 | 100,3497895 | 2016-May-12     | H5N8_0516          | CABAD8AA           | w                         | Wild-ans                | lime               |
| 224709_A_Bar-headed_Goose_Qinghai_BTY3-B_2016_H5N8_2016-May-12       | 36,7599029 | 100,3497895 | 2016-May-12     | H5N8_0516          | CABAD8AA           | w                         | Wild-ans                | lime               |
| 224710_A_Bar-headed_Goose_Qinghai_BTY3-LU_2016_H5N8_2016-May-12      | 36,7599029 | 100,3497895 | 2016-May-12     | H5N8_0516          | CABAD8AA           | w                         | Wild-ans                | lime               |
| 224711_A_Bar-headed_Goose_Qinghai_BTY4-B_2016_H5N8_2016-May-12       | 36,7599029 | 100,3497895 | 2016-May-12     | H5N8_0516          | CABAD8AA           | w                         | Wild-ans                | lime               |
| 224712_A_Bar-headed_Goose_Qinghai_BTY4-LU_2016_H5N8_2016-May-12      | 36,7599029 | 100,3497895 | 2016-May-12     | H5N8_0516          | CABAD8AA           | w                         | Wild-ans                | lime               |
| 224713_A_Bar-headed_Goose_Qinghai_BTY5-B_2016_H5N8_2016-May-12       | 36,7599029 | 100,3497895 | 2016-May-12     | H5N8_0516          | CABAD8AA           | w                         | Wild-ans                | lime               |
| 224714_A_Bar-headed_Goose_Qinghai_BTY6-B_2016_H5N8_2016-May-11       | 36,7599029 | 100,3497895 | 2016-May-11     | H5N8_0516          | CABAD8AA           | w                         | Wild-ans                | lime               |
| 224715_A_Bar-headed_Goose_Qinghai_BTY6-LU_2016_H5N8_2016-May-11      | 36,7599029 | 100,3497895 | 2016-May-11     | H5N8_0516          | CABAD8AA           | w                         | Wild-ans                | lime               |
| 224716_A_Bar-headed_Goose_Qinghai_BTY7-B_2016_H5N8_2016-May-11       | 36,7599029 | 100,3497895 | 2016-May-11     | H5N8_0516          | CABAD8AA           | w                         | Wild-ans                | lime               |
| 224717_A_Bar-headed_Goose_Qinghai_BTY7-LU1_2016_H5N8_2016-May-11     | 36,7599029 | 100,3497895 | 2016-May-11     | H5N8_0516          | CABAD8AA           | w                         | Wild-ans                | lime               |
| 224718_A_Bar-headed_Goose_Qinghai_BTY7-LU2_2016_H5N8_2016-May-11     | 36,7599029 | 100,3497895 | 2016-May-11     | H5N8_0516          | CABAD8AA           | w                         | Wild-ans                | lime               |
| 224719_A_Bar-headed_Goose_Qinghai_BTY8-B_2016_H5N8_2016-May-10       | 36,7599029 | 100,3497895 | 2016-May-10     | H5N8_0516          | CABAD8AA           | w                         | Wild-ans                | lime               |
| 224720_A_Bar-headed_Goose_Qinghai_BTY8-LU_2016_H5N8_2016-May-10      | 36,7599029 | 100,3497895 | 2016-May-10     | H5N8_0516          | CABAD8AA           | w                         | Wild-ans                | lime               |
| 224721_A_Bar-headed_Goose_Qinghai_BTY9-B_2016_H5N8_2016-May-09       | 36,7599029 | 100,3497895 | 2016-May-09     | H5N8_0516          | CABAD8AA           | w                         | Wild-ans                | lime               |
| 224722_A_Bar-headed_Goose_Qinghai_BTY9-LU_2016_H5N8_2016-May-09      | 36,7599029 | 100,3497895 | 2016-May-09     | H5N8_0516          | CABAD8AA           | w                         | Wild-ans                | lime               |
| 224723_A_Bar-headed_Goose_Qinghai_BTY10-B_2016_H5N8_2016-May-09      | 36,7599029 | 100,3497895 | 2016-May-09     | H5N8_0516          | CABAD8AA           | w                         | Wild-ans                | lime               |
| 224724_A_Bar-headed_Goose_Qinghai_BTY10-LU_2016_H5N8_2016-May-09     | 36,7599029 | 100,3497895 | 2016-May-09     | H5N8_0516          | CABAD8AA           | w                         | Wild-ans                | lime               |
| 224725_A_Bar-headed_Goose_Qinghai_BTY11-B_2016_H5N8_2016-May-09      | 36,7599029 | 100,3497895 | 2016-May-09     | H5N8_0516          | CABAD8AA           | w                         | Wild-ans                | lime               |
| 224726_A_Bar-headed_Goose_Qinghai_BTY11-LU_2016_H5N8_2016-May-09     | 36,7599029 | 100,3497895 | 2016-May-09     | H5N8_0516          | CABAD8AA           | w                         | Wild-ans                | lime               |
| 224727_A_Bar-headed_Goose_Qinghai_BTY12-B_2016_H5N8_2016-May-13      | 36,7599029 | 100,3497895 | 2016-May-13     | H5N8_0516          | CABAD8AA           | w                         | Wild-ans                | lime               |
| 224728_A_Bar-headed_Goose_Qinghai_BTY12-LU_2016_H5N8_2016-May-13     | 36,7599029 | 100,3497895 | 2016-May-13     | H5N8_0516          | CABAD8AA           | w                         | Wild-ans                | lime               |
| 224729_A_Bar-headed_Goose_Qinghai_BTY13-B_2016_H5N8_2016-May-14      | 36,7599029 | 100,3497895 | 2016-May-14     | H5N8_0516          | CABAD8AA           | w                         | Wild-ans                | lime               |
| 224730_A_Bar-headed_Goose_Qinghai_BTY13-LU_2016_H5N8_2016-May-14     | 36,7599029 | 100,3497895 | 2016-May-14     | H5N8_0516          | CABAD8AA           | w                         | Wild-ans                | lime               |
| 224731_A_Bar-headed_Goose_Qinghai_BTY14-B_2016_H5N8_2016-May-14      | 36,7599029 | 100,3497895 | 2016-May-14     | H5N8_0516          | CABAD8AA           | w                         | Wild-ans                | lime               |
| 224732_A_Bar-headed_Goose_Qinghai_BTY14-LU_2016_H5N8_2016-May-14     | 36,7599029 | 100,3497895 | 2016-May-14     | H5N8_0516          | CABAD8AA           | w                         | Wild-ans                | lime               |
| 224733_A_Bar-headed_Goose_Qinghai_BTY15-B_2016_H5N8_2016-May-14      | 36,7599029 | 100,3497895 | 2016-May-14     | H5N8_0516          | CABAD8AA           | w                         | Wild-ans                | lime               |
| 224734_A_Bar-headed_Goose_Qinghai_BTY15-LU_2016_H5N8_2016-May-14     | 36,7599029 | 100,3497895 | 2016-May-14     | H5N8_0516          | CABAD8AA           | w                         | Wild-ans                | lime               |
| 224735_A_Bar-headed_Goose_Qinghai_BTY16-B_2016_H5N8_2016-May-14      | 36,7599029 | 100,3497895 | 2016-May-14     | H5N8_0516          | CABAD8AA           | w                         | Wild-ans                | lime               |
| 224736_A_Bar-headed_Goose_Qinghai_BTY16-LU_2016_H5N8_2016-May-14     | 36,7599029 | 100,3497895 | 2016-May-14     | H5N8_0516          | CABAD8AA           | w                         | Wild-ans                | lime               |
| 224737_A_Bar-headed_Goose_Qinghai_BTY17-B_2016_H5N8_2016-May-15      | 36,7599029 | 100,3497895 | 2016-May-15     | H5N8_0516          | CABAD8AA           | w                         | Wild-ans                | lime               |
| 224738_A_Bar-headed_Goose_Qinghai_BTY17-LU_2016_H5N8_2016-May-15     | 36,7599029 | 100,3497895 | 2016-May-15     | H5N8_0516          | CABAD8AA           | w                         | Wild-ans                | lime               |
| 224739_A_Bar-headed_Goose_Qinghai_BTY18-B_2016_H5N8_2016-May-15      | 36,7599029 | 100,3497895 | 2016-May-15     | H5N8_0516          | CABAD8AA           | w                         | Wild-ans                | lime               |
| 224740_A_Bar-headed_Goose_Qinghai_BTY18-LU_2016_H5N8_2016-May-15     | 36,7599029 | 100,3497895 | 2016-May-15     | H5N8_0516          | CABAD8AA           | w                         | Wild-ans                | lime               |
| 224742_A_Brown-headed_Gull_Qinghai_ZTO1-B_2016_H5N8_2016-May-01      | 36,7599029 | 100,3497895 | 2016-May-01     | H5N8_0516          | CABAD8AA           | w                         | Wild-other              | lime               |
| 224743_A_Brown-headed_Gull_Qinghai_ZTO1-LU_2016_H5N8_2016-May-01     | 36,7599029 | 100,3497895 | 2016-May-01     | H5N8_0516          | CABAD8AA           | w                         | Wild-ans                | lime               |
| 224744_A_Brown-headed_Gull_Qinghai_ZTO3-B_2016_H5N8_2016-May-12      | 36,7599029 | 100,3497895 | 2016-May-12     | H5N8_0516          | CABAD8AA           | w                         | Wild-other              | lime               |
| 224745_A_Brown-headed_Gull_Qinghai_ZTO3-                             | 36,7599029 | 100,3497895 | 2016-May-12     | H5N8_0516          | CABAD8AA           | w                         | Wild-                   | lime               |

|                                                                                 |            |             |             |             |          |    |  |            |        |
|---------------------------------------------------------------------------------|------------|-------------|-------------|-------------|----------|----|--|------------|--------|
| LU_2016_H5N8_2016-May-12                                                        |            |             |             |             |          |    |  | other      |        |
| 224746_A_Brown-headed_Gull_Qinghai_ZTO4-B_2016_H5N8_2016-May-11                 | 36,7599029 | 100,3497895 | 2016-May-11 | H5N8_0516   | CABAD8AA | w  |  | Wild-other | lime   |
| 224747_A_Brown-headed_Gull_Qinghai_ZTO5-B_2016_H5N8_2016-May-14                 | 36,7599029 | 100,3497895 | 2016-May-14 | H5N8_0516   | CABAD8AA | w  |  | Wild-other | lime   |
| 224748_A_Brown-headed_Gull_Qinghai_ZTO5-K_2016_H5N8_2016-May-14                 | 36,7599029 | 100,3497895 | 2016-May-14 | H5N8_0516   | CABAD8AA | w  |  | Wild-other | lime   |
| 224750_A_Brown-headed_Gull_Qinghai_ZTO6-SP_2016_H5N8_2016-May-15                | 36,7599029 | 100,3497895 | 2016-May-15 | H5N8_0516   | CABAD8AA | w  |  | Wild-other | lime   |
| 224751_A_Brown-headed_Gull_Qinghai_ZTO6-MU_2016_H5N8_2016-May-15                | 36,7599029 | 100,3497895 | 2016-May-15 | H5N8_0516   | CABAD8AA | w  |  | Wild-ans   | lime   |
| 224752_A_Great_Black-headed_Gull_Qinghai_YO1-B_2016_H5N8_2016-May-15            | 36,7599029 | 100,3497895 | 2016-May-15 | H5N8_0516   | CABAD8AA | w  |  | Wild-other | lime   |
| 230820_A_great_crested_grebe_Tyva_34_2016_H5N8_2016-May-25                      | 51,8872669 | 95,6260172  | 2016-May-25 | H5N8_0516   | CABAD8AA | w  |  | Wild-other | lime   |
| 231684_A_wild_duck_Tyva_35_2016_H5N8_2016-May-25                                | 51,8872669 | 95,6260172  | 2016-May-25 | H5N8_0516   | CABAD8AA | w  |  | Wild-ans   | lime   |
| 231685_A_black-headed_gull_Tyva_41_2016_H5N8_2016-May-25                        | 51,8872669 | 95,6260172  | 2016-May-25 | H5N8_0516   | CABAD8AA | w  |  | Wild-other | lime   |
| 234057_A_grey_heron_Uvs-Nuur_Lake_20_2016_H5N8_2016-May-25                      | 50,3997872 | 92,6902698  | 2016-May-25 | H5N8_0516   | CABAD8AA | w  |  | Wild-other | lime   |
| 234058_A_common_tern_Uvs-Nuur_Lake_26_2016_H5N8_2016-May-25                     | 50,3997872 | 92,6902698  | 2016-May-25 | H5N8_0516   | CABAD8AA | w  |  | Wild-other | lime   |
| 237553_A_duck_India_10CA01_2016_H5N8_2016-Oct-17                                | 28,7040592 | 77,1024902  | 2016-Oct-17 | H5N8        | CABAA8AA | w  |  | Wild-ans   | silver |
| 237554_A_painted_stork_India_10CA03_2016_H5N8_2016-Oct-20                       | 26,2182871 | 78,1828308  | 2016-Oct-20 | H5N8_0916   | CAEAF8AA | w  |  | Wild-other | green  |
| 237730_A_mute_swan_Hungary_51049_2016_H5N8_2016-Oct-19                          | 46,416705  | 20,2566161  | 2016-Oct-19 | H5N8_1216.1 | BABAB8AA | w  |  | Wild-ans   | aqua   |
| 237731_A_domestic_turkey_Hungary_53433_2016_H5N8_2016-Nov-02                    | 46,6704899 | 21,0434996  | 2016-Nov-02 | H5N8_1216.1 | BABAB8AA | d  |  | Dom-gal    | aqua   |
| 237733_A_tufted_duck_Germany_AR8444-L01986_2016_H5N8_2016-Nov-07                | 54,1210641 | 10,4062216  | 2016-Nov-07 | H5N8_1116   | AAAAA8AA | w  |  | Wild-ans   | red    |
| 237921_A_wild_duck_Poland_82A_2016_H5N8_2016-Nov-02                             | 53,4657891 | 15,1822581  | 2016-Nov-02 | H5N8_1116   | AAAAA8AA | w  |  | Wild-ans   | red    |
| 237944_A_tufted_duck_Germany_AR8444-L01987_2016_H5N8_2016-Nov-07                | 54,1210641 | 10,4062216  | 2016-Nov-07 | H5N8_1116   | AAAAA8AA | w  |  | Wild-ans   | red    |
| 237945_A_tufted_duck_Germany_AR8459-L01988_2016_H5N8_2016-Nov-08                | 47,6363377 | 9,3892445   | 2016-Nov-08 | H5N8_1116   | AAAAA8AA | w  |  | Wild-ans   | red    |
| 237958_A_tufted_duck_Germany-SH_R8444_2016_H5N8_2016-Nov-07                     | 54,1210641 | 10,4062216  | 2016-Nov-07 | H5N8_1116   | AAAAA8AA | w  |  | Wild-ans   | red    |
| 237964_A_Mulard_duck_Hungary_54494_2016_H5N8_2016-Nov-08                        | 46,4904848 | 19,7366569  | 2016-Nov-08 | H5N8_1216.1 | BABAB8AA | d  |  | Dom-ans    | aqua   |
| 237965_A_goose_Hungary_55128_2016_H5N8_2016-Nov-11                              | 46,6883076 | 19,6833655  | 2016-Nov-11 | H5N8_1216.1 | BABAB8AA | w  |  | Wild-ans   | aqua   |
| 237966_A_duck_Hungary_55191_2016_H5N8_2016-Nov-11                               | 46,2791272 | 19,4908079  | 2016-Nov-11 | H5N8_1216.1 | BABAB8AA | d  |  | Dom-ans    | aqua   |
| 238037_A_turkey_Germany-SH_R8595_2016_H5N8_2016-Nov-09                          | 53,8654673 | 10,6865593  | 2016-Nov-09 | H5N8_1116   | AAAAA8AA | d  |  | Dom-gal    | red    |
| 238038_A_chicken_Germany-MV_R8790_2016_H5N8_2016-Nov-11                         | 54,149867  | 13,3165829  | 2016-Nov-11 | H5N8_1116   | AAAAA8AA | d  |  | Dom-gal    | red    |
| 238039_A_chicken_Germany-SH_R8758_2016_H5N8_2016-Nov-11                         | 54,6002536 | 9,6782757   | 2016-Nov-11 | H5N8_1116   | AAAAA8AA | d  |  | Dom-gal    | red    |
| 238196_A_mute_swan_Croatia_70_2016_H5N8_2016-Oct-30                             | 45,189484  | 18,6873659  | 2016-Oct-30 | H5N8_1216.1 | BABAB8AA | w  |  | Wild-ans   | aqua   |
| 238893_A_Chicken_Sweden_SVA161122KU0453_SZ0209316_2016_H5N8_2016-Nov-21         | 56,0582236 | 12,8798087  | 2016-Nov-21 | H5N8_1116   | AAAAA8AA | d  |  | Dom-gal    | red    |
| 238894_A_Chicken_Sweden_SVA161122KU0453_SZ0209317_2016_H5N8_2016-Nov-21         | 56,0582236 | 12,8798087  | 2016-Nov-21 | H5N8_1116   | AAAAA8AA | d  |  | Dom-gal    | red    |
| 238895_A_Chicken_Sweden_SVA161122KU0453_SZ0209318_2016_H5N8_2016-Nov-21         | 56,0582236 | 12,8798087  | 2016-Nov-21 | H5N8_1116   | AAAAA8AA | d  |  | Dom-gal    | red    |
| 238896_A_Chicken_Sweden_SVA161122KU0453_SZ0209321_2016_H5N8_2016-Nov-21         | 56,0582236 | 12,8798087  | 2016-Nov-21 | H5N8_1116   | AAAAA8AA | d  |  | Dom-gal    | red    |
| 238897_A_Common_Goldeneye_Sweden_SVA16117KU0322_SZ0002165_2016_H5N8_2016-Nov-14 | 55,4708928 | 13,0199899  | 2016-Nov-14 | H5N8_1116   | AAAAA8AA | w  |  | Wild-ans   | red    |
| 239419_A_chicken_Hungary_59048_2016_H5N8_2016-Nov-25                            | 47,2555579 | 20,5232456  | 2016-Nov-25 | H5N8_1216.1 | BABAB8AA | d  |  | Dom-gal    | aqua   |
| 239420_A_duck_Hungary_60441_2016_H5N8_2016-Dec-02                               | 46,5661437 | 19,4272464  | 2016-Dec-02 | H5N8_1216.1 | BABAB8AA | d  |  | Dom-ans    | aqua   |
| 239434_A_tufted_duck_Switzerland_V246-L02001_2016_H5N8_2016-Nov                 | 46,9106751 | 6,8721318   | 2016-Nov    | H5N8_1116   | AAAAA8AA | w  |  | Wild-ans   | red    |
| 239435_A_tufted_duck_Switzerland_V254-L02002_2016_H5N8_2016-Nov                 | 47,6363377 | 9,3892445   | 2016-Nov    | H5N8_1116   | AAAAA8AA | w  |  | Wild-ans   | red    |
| 239436_A_tufted_duck_Switzerland_V237-L02003_2016_H5N8_2016-Nov                 | 47,0811046 | 7,1696396   | 2016-Nov    | H5N8_1116   | AAAAA8AA | w  |  | Wild-ans   | red    |
| 239437_A_caspian_gull_Switzerland_V247-L02004_2016_H5N8_2016-Nov                | 46,9106751 | 6,8721318   | 2016-Nov    | H5N8_1116   | AAAAA8AA | w  |  | Wild-other | red    |
| 239801_A_turkey_England_052131_2016_H5N8_2016-Dec-15                            | 53,365962  | -0,007711   | 2016-Dec-15 | H5N8_1116   | AAAAA8AA | d  |  | Dom-gal    | red    |
| 239997_A_decoy_duck_France_161104e_2016_H5N8_2016-Nov-26                        | 50,5732769 | 2,3244679   | 2016-Nov-26 | H5N8_1116   | AAAAA8AA | na |  | Wild-ans   | red    |
| 240012_A_duck_France_161108h_2016_H5N8                                          | 43,9264401 | 1,9881527   | 2016-Nov-28 | H5N8_1216.1 | BABAB8AA | d  |  | Dom-ans    | aqua   |



|                                                                 |            |            |             |             |          |    |               |        |
|-----------------------------------------------------------------|------------|------------|-------------|-------------|----------|----|---------------|--------|
| 2016-Nov-28                                                     |            |            |             |             |          |    |               |        |
| 240101_A_mute_swan_Croatia_102_2016_H5N5_2016-Dec-27            | 45,3455244 | 16,7145278 | 2016-Dec-27 | H5N5_1216.1 | DCBAE5AA | w  | Wild-ans      | orange |
| 240102_A_domestic_goose_Poland_33_2016_H5N8_2016-Dec-02         | 52,2274612 | 15,2559103 | 2016-Dec-02 | H5N8_1216.2 | BDBAB8AA | d  | Dom-ans       | blue   |
| 240104_A_chicken_Poland_79A_2016_H5N8_2016-Dec-17               | 50,0574749 | 22,0895691 | 2016-Dec-17 | H5N8_1216.1 | BABAB8AA | d  | Dom-gal       | aqua   |
| 240110_A_chicken_Astrakhan_3131_2016_H5N8_2016-Dec-13           | 46,1321166 | 48,0610115 | 2016-Dec-13 | H5N8        | CABAE8AA | d  | Dom-gal       | silver |
| 240111_A_herring_gull_Poland_84_2016_H5N8_2016-Nov-09           | 53,9100327 | 14,2475775 | 2016-Nov-09 | H5N8_1116   | AAAAA8AA | w  | Wild-other    | red    |
| 240677_A_domestic_duck_Siberia_103_2016_H5N8_2016-Oct-04        | 55,4467133 | 80,1043923 | 2016-Oct-04 | H5N8_0916   | CAEAF8AA | d  | Dom-ans       | green  |
| 240892_A_turkey_Germany-NI_R10523_2016_H5N8_2016-Dec-13         | 52,7292252 | 8,2838762  | 2016-Dec-13 | H5N8_1216.2 | BDBAB8AA | d  | Dom-gal       | blue   |
| 240893_A_swan_Germany-SN_R10645_2016_H5N5_2016-Dec-13           | 51,477101  | 12,6941161 | 2016-Dec-13 | H5N5_1216.1 | DCBAE5AA | w  | Wild-ans      | orange |
| 241249_A_domestic_duck_Germany-MV_R9869_2016_H5N8_2016-Nov-23   | 53,6289326 | 11,7691945 | 2016-Nov-23 | H5N8_1116   | AAAAA8AA | d  | Dom-ans       | red    |
| 242817_A_chicken_Czech_Republic_206-17_2_2017_H5N8_2017-Jan-06  | 48,8752087 | 16,535382  | 2017-Jan-06 | H5N8_1216.2 | BDBAB8AA | d  | Dom-gal       | blue   |
| 242902_A_wigeon_Italy_17VIR57-3_2017_H5N8_2017-Jan-03           | 45,9053899 | 13,5163725 | 2017-Jan-03 | H5N8_1116   | AAAAA8AA | w  | Wild-ans-long | red    |
| 243049_A_turkey_Germany-SH_R425_2017_H5N5_2017-Jan-22           | 53,8425913 | 9,5386481  | 2017-Jan-22 | H5N5_1216.2 | DEBAG5AA | d  | Dom-gal       | yellow |
| 243050_A_barnacle_goose_Germany-SH_R11505_2016_H5N5_2016-Dec-22 | 53,8988902 | 9,1338853  | 2016-Dec-22 | H5N5_1216.1 | DCBAE5AA | w  | Wild-ans      | orange |
| 243085_A_wigeon_Italy_16VIR9616-3_2016_H5N5_2016-Dec-29         | 45,9053899 | 13,5163725 | 2016-Dec-29 | H5N5_1216.1 | DCBAE5AA | w  | Wild-ans-long | orange |
| 243698_A_mute_swan_Croatia_42_2017_H5N5_2017-Jan-20             | 45,6721313 | 18,843553  | 2017-Jan-20 | H5N5_1216.1 | DCBAE5AA | w  | Wild-ans      | orange |
| 247429_A_domestic_duck_Germany-BB_R681ff_2017_H5N8_2017-Jan-26  | 52,6       | 14,2500001 | 2017-Jan-26 | H5N8_1216.2 | BDBAB8AA | d  | Dom-ans       | blue   |
| 247713_A_tufted_duck_Denmark_17740-1_2016_H5N8_2016-Nov-08      | 55,6760425 | 12,6081154 | 2016-Nov-08 | H5N8_1116   | AAAAA8AA | w  | Wild-ans      | red    |
| 247715_A_long-eared_owl_Voronezh_15_2017_H5N8_2017-Jan-06       | 50,8589713 | 39,8644374 | 2017-Jan-06 | H5N8_1116   | AAAAA8AA | w  | Wild-other    | red    |
| 247716_A_Ural_owl_Voronezh_14_2017_H5N8_2017-Jan-06             | 51,6754966 | 39,2088823 | 2017-Jan-06 | H5N8_1116   | AAAAA8AA | w  | Wild-other    | red    |
| 247717_A_long-eared_owl_Voronezh_16_2017_H5N8_2017-Jan-06       | 50,8589713 | 39,8644374 | 2017-Jan-06 | H5N8_1116   | AAAAA8AA | w  | Wild-other    | red    |
| 247718_A_chicken_Voronezh_18_2017_H5N8_2017-Jan-06              | 50,8589713 | 39,8644374 | 2017-Jan-06 | H5N8_1116   | AAAAA8AA | d  | Dom-gal       | red    |
| 247719_A_chicken_Voronezh_19_2017_H5N8_2017-Jan-06              | 50,8589713 | 39,8644374 | 2017-Jan-06 | H5N8_1116   | AAAAA8AA | d  | Dom-gal       | red    |
| 247720_A_chicken_Voronezh_20_2017_H5N8_2017-Jan-06              | 50,8589713 | 39,8644374 | 2017-Jan-06 | H5N8_1116   | AAAAA8AA | d  | Dom-gal       | red    |
| 247721_A_turkey_Rostov-on-Don_11_2017_H5N8_2017-Jan-01          | 47,6853247 | 41,8258952 | 2017-Jan-01 | H5N8_1116   | AAAAA8AA | d  | Dom-gal       | red    |
| 247722_A_goose_Krasnodar_3144_2017_H5N8_2017-Jan-06             | 45,6415289 | 39,7055977 | 2017-Jan-06 | H5N8_1116   | AAAAA8AA | d  | Dom-ans       | red    |
| 247723_A_mute_swan_Krasnodar_25_2017_H5N8_2017-Jan-06           | 45,6415289 | 39,7055977 | 2017-Jan-06 | H5N8_1116   | AAAAA8AA | w  | Wild-ans      | red    |
| 247724_A_wild_duck_Tatarstan_3059_2016_H5N8_2016-Oct-02         | 55,1802364 | 50,7263945 | 2016-Oct-02 | H5N8_1116   | AAAAA8AA | w  | Wild-ans      | red    |
| 247725_A_chicken_Kalmykia_2643_2016_H5N8_2016-Nov-21            | 46,5676845 | 45,7731614 | 2016-Nov-21 | H5N8_1116   | AAAAA8AA | d  | Dom-gal       | red    |
| 249681_A_turkey_Germany-BB_R234ff_2017_H5N8_2017-Jan-09         | 52,9432288 | 12,3961713 | 2017-Jan-09 | H5N8_1216.2 | BDBAB8AA | d  | Dom-gal       | blue   |
| 249682_A_domestic_goose_Germany-BY_R677_2017_H5N8_2017-Jan-25   | 49,0134297 | 12,1016236 | 2017-Jan-25 | H5N8_1216.1 | BABAB8AA | d  | Dom-ans       | aqua   |
| 249691_A_chicken_Germany-MV_R10048_2016_H5N8_2016-Nov-27        | 53,8647592 | 11,6859731 | 2016-Nov-27 | H5N8_1116   | AAAAA8AA | d  | Dom-gal       | red    |
| 249692_A_chicken_Germany-NI_R11406_2016_H5N8_2016-Dec-24        | 51,7001785 | 9,9959057  | 2016-Dec-24 | H5N8_1116   | AAAAA8AA | d  | Dom-gal       | red    |
| 250231_A_gadwall_Chany_97_2016_H5N8_2016-Sep-10                 | 55,3135139 | 76,7761387 | 2016-Sep-10 | H5N8_0916   | CAEAF8AA | w  | Dom-ans       | green  |
| 250885_A_mute_swan_Czech_Republic_54-17_2_2017_H5N8_2017-Jan-02 | 49,4499651 | 16,7179572 | 2017-Jan-02 | H5N8_1216.1 | BABAB8AA | w  | Wild-ans      | aqua   |
| 250887_A_chicken_Czech_Republic_55-17_1_2017_H5N8_2017-Jan-02   | 49,0351529 | 16,3193591 | 2017-Jan-02 | H5N8_1216.1 | BABAB8AA | d  | Dom-gal       | aqua   |
| 253036_A_turkey_England_003778_2017_H5N8_2017-Jan-15            | 52,9451889 | -0,1601246 | 2017-Jan-15 | H5N8_1116   | AAAAA8AA | d  | Dom-gal       | red    |
| 253037_A_chicken_Wales_000023_2016_H5N8_2016-Dec-31             | 51,8572309 | -4,3115959 | 2016-Dec-31 | H5N8_1116   | AAAAA8AA | d  | Dom-gal       | red    |
| 254725_A_chicken_Korea_H903_2017_H5N8_2017-Feb-08               | 35,7175    | 127,153    | 2017-Feb-08 | H5N8_0916   | CAEAF8AA | d  | Dom-gal       | green  |
| 254745_A_mallard_duck_Korea_WA137_2017_H5N8_2017-Jan-24         | 36,5184    | 126,8      | 2017-Jan-24 | H5N8_0916   | CAEAF8AA | w  | Wild-ans      | green  |
| 254814_A_mallard_Hungary_57857_2016_H5N8_2016-Nov-21            | 47,4688355 | 21,5453227 | 2016-Nov-21 | H5N8_1216.1 | BABAB8AA | w  | Wild-ans      | aqua   |
| 255174_A_Goose_Hungary_65817_2016_H5N8_2016-Dec-18              | 47,4688355 | 21,5453227 | 2016-Dec-18 | H5N8_1216.2 | BDBAB8AA | na | Dom-ans       | blue   |

|                                                                      |            |            |             |             |          |    |               |        |
|----------------------------------------------------------------------|------------|------------|-------------|-------------|----------|----|---------------|--------|
| 255181_A_swan_Italy_17VIR537-2_2017_H5N8_2017-Jan-19                 | 46,0710668 | 13,2345794 | 2017-Jan-19 | H5N8_1116   | AAAAA8AA | w  | Wild-ans      | red    |
| 255182_A_turkey_Italy_17VIR538-1_2017_H5N8_2017-Jan-20               | 45,4408474 | 12,3155151 | 2017-Jan-20 | H5N8_0916   | CAEAF8AA | d  | Dom-gal       | green  |
| 255183_A_turkey_Italy_17VIR576-11_2017_H5N8_2017-Jan-23              | 45,4064349 | 11,8767611 | 2017-Jan-23 | H5N8_1116   | AAAAA8AA | d  | Dom-gal       | red    |
| 255184_A_chicken_Italy_17VIR653-12_2017_H5N8_2017-Jan-25             | 45,0698118 | 11,7902158 | 2017-Jan-25 | H5N8_1116   | AAAAA8AA | d  | Dom-gal       | red    |
| 255185_A_turkey_Italy_17VIR973-2_2017_H5N8_2017-Feb-01               | 44,801485  | 10,3279036 | 2017-Feb-01 | H5N8_1216.1 | BABAB8AA | d  | Dom-gal       | aqua   |
| 255186_A_turkey_Italy_17VIR1338-3_2017_H5N8_2017-Feb-14              | 45,1564168 | 10,7913751 | 2017-Feb-14 | H5N8_1216.1 | BABAB8AA | d  | Dom-gal       | aqua   |
| 255187_A_turkey_Italy_17VIR1452-22_2017_H5N8_2017-Feb-16             | 45,4383842 | 10,9916215 | 2017-Feb-16 | H5N8_1116   | AAAAA8AA | d  | Dom-gal       | red    |
| 255189_A_gadwall_Italy_17VIR133-2_2017_H5N5_2017-Jan-10              | 45,9401812 | 13,6201754 | 2017-Jan-10 | H5N5_1216.1 | DCBAE5AA | w  | Wild-ans      | orange |
| 255190_A_Mute_swan_Hungary_119_2017_H5N8_2017-Jan-02                 | 46,554859  | 17,5866732 | 2017-Jan-02 | H5N8_1216.1 | BABAB8AA | w  | Wild-ans      | aqua   |
| 255191_A_Harris_Hawk_Hungary_120_2017_H5N8_2017-Jan-02               | 47,497912  | 19,040235  | 2017-Jan-02 | H5N8_1216.1 | BABAB8AA | w  | Wild-other    | aqua   |
| 255192_A_Goose_Hungary_982_2017_H5N8_2017-Jan-11                     | 47,2555579 | 20,5232456 | 2017-Jan-11 | H5N8_1216.1 | BABAB8AA | na | Dom-ans       | aqua   |
| 255193_A_Duck_Hungary_984_2017_H5N8_2017-Jan-11                      | 46,6704899 | 21,0434996 | 2017-Jan-11 | H5N8_1216.1 | BABAB8AA | na | Dom-ans       | aqua   |
| 255194_A_Goose_Hungary_1030_2017_H5N8_2017-Jan-11                    | 46,416705  | 20,2566161 | 2017-Jan-11 | H5N8_1116   | AAAAA8AA | na | Dom-ans       | red    |
| 255195_A_Duck_Hungary_1588_2017_H5N8_2017-Jan-16                     | 46,5661437 | 19,4272464 | 2017-Jan-16 | H5N8_1216.1 | BABAB8AA | na | Dom-ans       | aqua   |
| 255196_A_Greylag_goose_Hungary_1941_2017_H5N8_2017-Jan-18            | 47,1217932 | 18,5294815 | 2017-Jan-18 | H5N8_1216.1 | BABAB8AA | w  | Wild-ans-long | aqua   |
| 255197_A_Mute_swan_Hungary_1955_2017_H5N8_2017-Jan-18                | 47,0930974 | 17,9100763 | 2017-Jan-18 | H5N8_1216.1 | BABAB8AA | w  | Wild-ans      | aqua   |
| 255198_A_Turkey_Hungary_2030_2017_H5N8_2017-Jan-18                   | 47,0930974 | 17,9100763 | 2017-Jan-18 | H5N8_1216.1 | BABAB8AA | w  | Dom-gal       | aqua   |
| 255199_A_Mute_swan_Hungary_2193_2017_H5N8_2017-Jan-19                | 48,2939401 | 20,6934112 | 2017-Jan-19 | H5N8_1216.1 | BABAB8AA | w  | Wild-ans      | aqua   |
| 255200_A_Mute_swan_Hungary_2508_2017_H5N8_2017-Jan-22                | 47,162494  | 19,5033041 | 2017-Jan-22 | H5N8_1216.1 | BABAB8AA | w  | Wild-ans      | aqua   |
| 255201_A_Mute_swan_Hungary_2825_2017_H5N8_2017-Jan-24                | 46,4258265 | 18,7752069 | 2017-Jan-24 | H5N8_1216.1 | BABAB8AA | w  | Wild-ans      | aqua   |
| 255202_A_Mute_swan_Hungary_3139_2017_H5N8_2017-Jan-26                | 46,7384404 | 16,9152252 | 2017-Jan-26 | H5N8_1216.1 | BABAB8AA | w  | Wild-ans      | aqua   |
| 255203_A_Mute_swan_Hungary_3513_2017_H5N8_2017-Jan-27                | 47,0929111 | 16,6812183 | 2017-Jan-27 | H5N8_1216.1 | BABAB8AA | w  | Wild-ans      | aqua   |
| 255204_A_Mute_swan_Hungary_3542_2017_H5N8_2017-Jan-29                | 47,497912  | 19,040235  | 2017-Jan-29 | H5N8_1216.1 | BABAB8AA | w  | Wild-ans      | aqua   |
| 255205_A_Chicken_Hungary_2496_2017_H5N8_2017-Jan-24                  | 47,2555579 | 20,5232456 | 2017-Jan-24 | H5N8_1216.1 | BABAB8AA | d  | Dom-gal       | aqua   |
| 255206_A_Peregrine_falcon_Hungary_4882_2017_H5N8_2017-Feb-07         | 47,6509285 | 17,2505883 | 2017-Feb-07 | H5N8_1116   | AAAAA8AA | w  | Wild-other    | red    |
| 255207_A_Mute_swan_Hungary_5316_2017_H5N8_2017-Feb-09                | 46,4258265 | 18,7752069 | 2017-Feb-09 | H5N8_1216.1 | BABAB8AA | w  | Wild-ans      | aqua   |
| 255208_A_Common_buzzard_Hungary_7061_2017_H5N8_2017-Feb-21           | 46,4258265 | 18,7752069 | 2017-Feb-21 | H5N8_1216.1 | BABAB8AA | w  | Wild-other    | aqua   |
| 255209_A_Common_tern_Hungary_8187_2017_H5N8_2017-Feb-28              | 46,4762754 | 18,5570627 | 2017-Feb-28 | H5N8_1116   | AAAAA8AA | w  | Wild-other    | red    |
| 255210_A_Harris_hawk_Hungary_2762a_2017_H5N8_2017-Jan-24             | 47,4480001 | 19,4618128 | 2017-Jan-24 | H5N8_1216.1 | BABAB8AA | w  | Wild-other    | aqua   |
| 255211_A_Harris_hawk_Hungary_2762b_2017_H5N8_2017-Jan-24             | 47,4480001 | 19,4618128 | 2017-Jan-24 | H5N8_1216.1 | BABAB8AA | w  | Wild-other    | aqua   |
| 255212_A_Greylag_goose_Hungary_320_2017_H5N8_2017-Jan-04             | 46,554859  | 17,5866732 | 2017-Jan-04 | H5N8_1116   | AAAAA8AA | w  | Wild-other    | red    |
| 255213_A_GuineaFowl_Hungary_596_2017_H5N8_2017-Jan-06                | 47,4688355 | 21,5453227 | 2017-Jan-06 | H5N8_1216.1 | BABAB8AA | w  | Wild-other    | aqua   |
| 255214_A_Chicken_Hungary_1751_2017_H5N8_2017-Jan-17                  | 47,6509285 | 17,2505883 | 2017-Jan-17 | H5N8_1216.1 | BABAB8AA | d  | Dom-gal       | aqua   |
| 255215_A_Mute_swan_Hungary_3137_2017_H5N8_2017-Jan-26                | 46,7384404 | 16,9152252 | 2017-Jan-26 | H5N8_1216.1 | BABAB8AA | w  | Wild-ans      | aqua   |
| 255216_A_Mallard_Hungary_5821_2017_H5N8_2017-Feb-13                  | 46,7384404 | 16,9152252 | 2017-Feb-13 | H5N8_1216.1 | BABAB8AA | w  | Wild-ans      | aqua   |
| 255218_A_Mallard_Hungary_1574b_2017_H5N8_2017-Jan-14                 | 46,554859  | 17,5866732 | 2017-Jan-14 | H5N8_1116   | AAAAA8AA | w  | Wild-ans      | red    |
| 255219_A_White_fronted_goose_Hungary_801_2017_H5N8_2017-Jan-09       | 47,4688355 | 21,5453227 | 2017-Jan-09 | H5N8_1216.1 | BABAB8AA | w  | Wild-ans-long | aqua   |
| 255220_A_Mallard_Hungary_1574a_2017_H5N8_2017-Jan-14                 | 46,554859  | 17,5866732 | 2017-Jan-14 | H5N8_1116   | AAAAA8AA | w  | Wild-ans      | red    |
| 255398_A_Goose_Hungary_59712_2016_H5N8_2016-Nov-26                   | 46,7084264 | 20,1436061 | 2016-Nov-26 | H5N8_1216.1 | BABAB8AA | d  | Dom-ans       | aqua   |
| 255891_A_Tufted_Duck_Netherlands_1_2016_H5N8_2016-Nov-25             | 52,5045411 | 5,045998   | 2016-Nov-25 | H5N8_1116   | AAAAA8AA | w  | Wild-ans      | red    |
| 255892_A_Great_Black-backed_Gull_Netherlands_2_2016_H5N8_2016-Nov-23 | 52,5205869 | 4,788474   | 2016-Nov-23 | H5N8_1116   | AAAAA8AA | w  | Wild-other    | red    |
| 255910_A_Mew_Gull_Netherlands_1_2016_H5N8_2016-Nov-23                | 52,5205869 | 4,788474   | 2016-Nov-23 | H5N8_1116   | AAAAA8AA | w  | Wild-other    | red    |

|                                                                            |            |             |             |             |          |    |               |        |
|----------------------------------------------------------------------------|------------|-------------|-------------|-------------|----------|----|---------------|--------|
| 255912_A_Eurasian_Wigeon_Netherlands_4_2016_H5N8_2016-Dec-09               | 52,0207975 | 4,4937836   | 2016-Dec-09 | H5N8_1116   | AAAAA8AA | w  | Wild-ans-long | red    |
| 255913_A_Mallard_Netherlands_2_2017_H5N8_2017-Jan-07                       | 52,0207975 | 4,4937836   | 2017-Jan-07 | H5N8_1116   | AAAAA8AA | w  | Wild-ans      | red    |
| 255914_A_Eurasian_Wigeon_Netherlands_9_2016_H5N8_2016-Dec-04               | 52,5205869 | 4,788474    | 2016-Dec-04 | H5N8_1116   | AAAAA8AA | w  | Wild-ans-long | red    |
| 255917_A_mute_swan_Poland_64_2017_H5N5_2017-Jan-31                         | 51,1339861 | 16,8841961  | 2017-Jan-31 | H5N5_1216.1 | DCBAE5AA | w  | Wild-ans      | orange |
| 255933_A_Cormorant_Hungary_6102_2017_H5N8_2017-Feb-15                      | 47,6291394 | 18,4014586  | 2017-Feb-15 | H5N8_1216.1 | BABAB8AA | w  | Wild-other    | aqua   |
| 255934_A_Mute_swan_Hungary_6092_2017_H5N8_2017-Feb-15                      | 47,6291394 | 18,4014586  | 2017-Feb-15 | H5N8_1216.2 | BDBAB8AA | w  | Wild-ans      | blue   |
| 255935_A_Mute_swan_Hungary_6276_2017_H5N8_2017-Feb-16                      | 46,7384404 | 16,9152252  | 2017-Feb-16 | H5N8_1216.1 | BABAB8AA | w  | Wild-ans      | aqua   |
| 255936_A_Pheasant_Hungary_6553_2017_H5N8_2017-Feb-16                       | 47,2555579 | 20,5232456  | 2017-Feb-16 | H5N8_1216.1 | BABAB8AA | na | Wild-other    | aqua   |
| 255937_A_Pheasant_Hungary_7685_2017_H5N8_2017-Feb-24                       | 47,2555579 | 20,5232456  | 2017-Feb-24 | H5N8_1216.1 | BABAB8AA | na | Wild-other    | aqua   |
| 255938_A_Rook_Hungary_4975_2017_H5N8_2017-Feb-08                           | 48,0394954 | 22,00333    | 2017-Feb-08 | H5N8_1216.1 | BABAB8AA | w  | Wild-other    | aqua   |
| 256298_A_gadwall_Kurgan_2442_2016_H5N8_2016-Aug-27                         | 55,4481548 | 65,1180975  | 2016-Aug-27 | H5N8_1116   | AAAAA8AA | w  | Wild-ans      | red    |
| 256299_A_chicken_Sergiyev_Posad_38_2017_H5N8_2017-Mar-02                   | 56,3242317 | 38,1452115  | 2017-Mar-02 | H5N8_1116   | AAAAA8AA | d  | Dom-gal       | red    |
| 256300_A_chicken_Sergiyev_Posad_39_2017_H5N8_2017-Mar-02                   | 56,3242317 | 38,1452115  | 2017-Mar-02 | H5N8_1116   | AAAAA8AA | d  | Dom-gal       | red    |
| 256301_A_environment_Kamchatka_18_2016_H5N5_2016-Oct-01                    | 61,4343981 | 166,7884131 | 2016-Oct-01 | H5N5_1216.1 | DCBAE5AA | w  | Wild-other    | orange |
| 256305_A_shelduck_Italy_17VIR1572-24_2017_H5N8_2017-Jan-03                 | 45,0698118 | 11,7902158  | 2017-Jan-03 | H5N8_1216.1 | BABAB8AA | w  | Wild-ans      | aqua   |
| 256306_A_turkey_Italy_17VIR1574-1_2017_H5N8_2017-Feb-21                    | 45,1564168 | 10,7913751  | 2017-Feb-21 | H5N8_1216.1 | BABAB8AA | d  | Dom-gal       | aqua   |
| 256307_A_chicken_Italy_17VIR1684-2_2017_H5N8_2017-Feb-27                   | 45,4408474 | 12,3155151  | 2017-Feb-27 | H5N8_1216.1 | BABAB8AA | d  | Dom-gal       | aqua   |
| 256308_A_chicken_Italy_17VIR1751-3_2017_H5N8_2017-Feb-27                   | 45,4408474 | 12,3155151  | 2017-Feb-27 | H5N8_1216.1 | BABAB8AA | d  | Dom-gal       | aqua   |
| 256453_A_Duck_Hungary_54738_2016_H5N8_2016-Nov-09                          | 46,5661437 | 19,4272464  | 2016-Nov-09 | H5N8_1216.1 | BABAB8AA | na | Dom-ans       | aqua   |
| 256457_A_Duck_Hungary_55764_2016_H5N8_2016-Nov-11                          | 46,5661437 | 19,4272464  | 2016-Nov-11 | H5N8_1216.1 | BABAB8AA | na | Dom-ans       | aqua   |
| 256460_A_Turkey_Hungary_53136_2016_H5N8_2016-Nov-01                        | 46,7711185 | 21,1289753  | 2016-Nov-01 | H5N8_1216.1 | BABAB8AA | d  | Dom-gal       | aqua   |
| 256462_A_Mute_swan_Hungary_5879_2017_H5N5_2017-Feb-14                      | 47,497912  | 19,040235   | 2017-Feb-14 | H5N5_1216.1 | DCBAE5AA | w  | Wild-ans      | orange |
| 256817_A_turkey_Germany-NI_R9807_2016_H5N8_2016-Nov-22                     | 52,844198  | 8,0530158   | 2016-Nov-22 | H5N8_1116   | AAAAA8AA | d  | Dom-gal       | red    |
| 256818_A_domestic_duck_Germany-MV_R9764_2016_H5N8_2016-Nov-21              | 54,0660319 | 13,6112761  | 2016-Nov-21 | H5N8_1116   | AAAAA8AA | d  | Dom-ans       | red    |
| 257004_A_chicken_Czech_Republic_206-17_2_2017_H5N8_2017-Jan-06             | 49,817492  | 15,472962   | 2017-Jan-06 | H5N8_1216.2 | BDBAB8AA | d  | Dom-gal       | blue   |
| 257699_A_Tufted_Duck_Switzerland_V237_2016_H5N8_2016-Nov-13                | 47,134821  | 7,248602    | 2016-Nov-13 | H5N8_1116   | AAAAA8AA | w  | Wild-ans      | red    |
| 257731_A_turkey_Germany-BB_R377ff_2017_H5N8_2017-Jan-17                    | 51,9155157 | 14,0424255  | 2017-Jan-17 | H5N8_1216.2 | BDBAB8AA | d  | Dom-gal       | blue   |
| 259074_A_common_buzzard_Germany-SN_R1117_2017_H5N5_2017-Feb-06             | 51,2937    | 14,8024606  | 2017-Feb-06 | H5N5_1216.1 | DCBAE5AA | w  | Wild-ans      | orange |
| 260058_A_grey_heron_Germany-SN_R572_2017_H5N5_2017-Jan-22                  | 50,7893112 | 13,0104598  | 2017-Jan-22 | H5N5_1216.1 | DCBAE5AA | w  | Wild-other    | orange |
| 260059_A_cormorant_Germany-SH_R896_2017_H5N5_2017-Jan-30                   | 54,0729431 | 9,9840158   | 2017-Jan-30 | H5N5_1216.2 | DEBAG5AA | w  | Wild-other    | yellow |
| 261332_A_chicken_Croatia_104_2017_H5N5_2017-Mar-07                         | 46,0263862 | 15,9597619  | 2017-Mar-07 | H5N5_1216.1 | DCBAE5AA | d  | Dom-gal       | orange |
| 261634_A_chicken_Republic_of_Macedonia_AR1167-L02131_2017_H5N8_2017-Jan-21 | 41,608635  | 21,745275   | 2017-Jan-21 | H5N8_1216.1 | BABAB8AA | d  | Dom-gal       | aqua   |
| 261687_A_black_swan_Germany-BW_R1364_2017_H5N8_2017-Feb-12                 | 49,052867  | 8,3745      | 2017-Feb-12 | H5N8_1216.1 | BABAB8AA | w  | Wild-ans      | aqua   |
| 262055_A_eurasian_wigeon_Germany-NI_AR249-L02143_2017_H5N8_2017-Jan-04     | 53,5323403 | 8,1068722   | 2017-Jan-04 | H5N8_1116   | AAAAA8AA | w  | Wild-ans-long | red    |
| 262056_A_greylag_goose_Germany-NI-AR11353-L02142_2016_H5N5_2016-Dec-27     | 53,6623106 | 7,9165173   | 2016-Dec-27 | H5N5_1216.1 | DCBAE5AA | w  | Wild-ans-long | orange |
| 262057_A_mute_swan_Germany-NI_AR1529-L02145_2017_H5N8_2017-Feb-14          | 53,2512996 | 8,0110148   | 2017-Feb-14 | H5N8_1116   | AAAAA8AA | w  | Wild-ans      | red    |
| 262058_A_greylag_goose_Germany-NI_AR1395-L02144_2017_H5N8_2017-Feb-02      | 52,3204095 | 10,243267   | 2017-Feb-02 | H5N8_1216.2 | BDBAB8AA | w  | Wild-ans-long | blue   |
| 262059_A_greylag_goose_Germany-NI_AR703-L02138_2017_H5N8_2017-Jan-25       | 52,3223313 | 9,7299802   | 2017-Jan-25 | H5N8_1216.2 | BDBAB8AA | w  | Wild-ans-long | blue   |
| 263097_A_domestic_duck_Germany-NI_AR2054-L02155_2017_H5N8_2017-Mar-08      | 53,5766311 | 7,773289    | 2017-Mar-08 | H5N8_1216.2 | BDBAB8AA | d  | Dom-ans       | blue   |
| 263099_A_domestic_goose_Germany-NI_AR519-L02153_2017_H5N8_2017-Jan-23      | 52,5714393 | 7,495371    | 2017-Jan-23 | H5N8_1116   | AAAAA8AA | d  | Dom-ans       | red    |
| 263101_A_turkey_Germany-NI_AR2659-L02159_2017_H5N8_2017-Mar-22             | 52,9531085 | 8,0255988   | 2017-Mar-22 | H5N8_1216.2 | BDBAB8AA | d  | Dom-gal       | blue   |
| 263103_A_turkey_Germany-NI_AR01-L02115_2017_H5N8_2017-Jan-02               | 52,9531085 | 8,0255988   | 2017-Jan-02 | H5N8_1216.2 | BDBAB8AA | d  | Dom-gal       | blue   |
| 263117_A_turkey_Germany-NI_AR11365-                                        | 52,9354504 | 8,3807889   | 2016-Dec-24 | H5N8_1116   | AAAAA8AA | d  | Dom-gal       | red    |

|                                                                         |            |            |             |             |          |    |               |        |  |
|-------------------------------------------------------------------------|------------|------------|-------------|-------------|----------|----|---------------|--------|--|
| L02128_2016_H5N8_2016-Dec-24                                            |            |            |             |             |          |    |               |        |  |
| 263118_A_turkey_Germany-NL_AR11416-L02124_2016_H5N8_2016-Dec-25         | 52,9531085 | 8,0255988  | 2016-Dec-25 | H5N8_1216.2 | BDBAB8AA | d  | Dom-gal       | blue   |  |
| 263119_A_turkey_Germany-NL_AR11461-L02127_40_2016_H5N8_2016-Dec-27      | 53,1082424 | 8,4691725  | 2016-Dec-27 | H5N8_1116   | AAAAA8AA | d  | Dom-gal       | red    |  |
| 263120_A_turkey_Germany-NL_AR11550-L02126_2016_H5N8_2016-Dec-29         | 53,1082424 | 8,4691725  | 2016-Dec-29 | H5N8_1216.2 | BDBAB8AA | d  | Dom-gal       | blue   |  |
| 266417_A_common_teal_Korea_W547_2016_H5N8_2016-Dec-15                   | 35,907757  | 127,766922 | 2016-Dec-15 | H5N8_0916   | CAEAF8AA | w  | Wild-ans-long | green  |  |
| 266418_A_common_teal_Korea_W549_2016_H5N8_2016-Dec-15                   | 35,907757  | 127,766922 | 2016-Dec-15 | H5N8_0916   | CAEAF8AA | w  | Wild-ans-long | green  |  |
| 266419_A_common_teal_Korea_W548_2016_H5N8_2016-Dec-15                   | 35,907757  | 127,766922 | 2016-Dec-15 | H5N8_0916   | CAEAF8AA | d  | Wild-ans-long | green  |  |
| 266420_A_common_teal_Korea_W550_2016_H5N8_2016-Dec-15                   | 35,907757  | 127,766922 | 2016-Dec-15 | H5N8_0916   | CAEAF8AA | w  | Wild-ans-long | green  |  |
| 266421_A_common_teal_Korea_W555_2017_H5N8_2017-Jan-04                   | 35,907757  | 127,766922 | 2017-Jan-04 | H5N8_0916   | CAEAF8AA | w  | Wild-ans-long | green  |  |
| 266536_A_chicken_Belgium_807_2017_H5N8_2017-Feb-01                      | 50,503887  | 4,469936   | 2017-Feb-01 | H5N8_1116   | AAAAA8AA | d  | Dom-gal       | red    |  |
| 266537_A_peacock_Belgium_1017_2017_H5N8_2017-Feb-08                     | 50,503887  | 4,469936   | 2017-Feb-08 | H5N8_1116   | AAAAA8AA | na | Wild-other    | red    |  |
| 266538_A_Cygnus_olor_Belgium_1567_2017_H5N8_2017-Feb-21                 | 50,503887  | 4,469936   | 2017-Feb-21 | H5N8_1216.1 | BABAB8AA | w  | Wild-ans      | aqua   |  |
| 266944_A_emu_Germany-ST_R321_2017_H5N8_2017-Jan-03                      | 51,7505762 | 11,9802357 | 2017-Jan-03 | H5N8_1216.2 | BDBAB8AA | d  | Wild-other    | blue   |  |
| 266945_A_greylag_goose_Germany-SN_R513_2017_H5N8_2017-Jan-21            | 51,1045407 | 13,2017384 | 2017-Jan-21 | H5N8_1216.2 | BDBAB8AA | w  | Wild-ans-long | blue   |  |
| 266946_A_egret_Germany-SH_R1315_2017_H5N8_2017-Mar-11                   | 54,2193672 | 9,6961167  | 2017-Mar-11 | H5N8_1116   | AAAAA8AA | w  | Wild-other    | red    |  |
| 267135_A_green-winged_teal_Egypt_871_2016_H5N8_2016-Dec-08              | 26,820553  | 30,802498  | 2016-Dec-08 | H5N8_0916   | CAEAF8AA | w  | Wild-ans-long | green  |  |
| 267136_A_green-winged_teal_Egypt_877_2016_H5N8_2016-Dec-08              | 26,820553  | 30,802498  | 2016-Dec-08 | H5N8_0916   | CAEAF8AA | w  | Wild-ans-long | green  |  |
| 268021_A_duck_Egypt_SS19_2017_H5N8_2017-Jan-12                          | 30,7326622 | 31,7195459 | 2017-Jan-12 | H5N8        | NA       | d  | Dom-ans       | silver |  |
| 268513_A_duck_Egypt_F446_2017_H5N8_2017-Apr-06                          | 30,0444196 | 31,2357116 | 2017-Apr-06 | H5N8_1116   | AAAAA8AA | w  | Wild-ans      | red    |  |
| 268618_A_Bk_swan_NL-Den_Oever_16013973-002_2016_H5N8_2016-Nov-10        | 52,9343779 | 5,0282699  | 2016-Nov-10 | H5N8_1116   | AAAAA8AA | w  | Wild-ans-long | red    |  |
| 268619_A_Bl_H_gull_NL-Slootdorp_16014102-002_2016_H5N8_2016-Nov-11      | 52,8451344 | 4,9686855  | 2016-Nov-11 | H5N8_1116   | AAAAA8AA | w  | Wild-other    | red    |  |
| 268620_A_Buzzard_NL-Dursterdam_16015100-004_2016_H5N8_2016-Nov-30       | 52,3780596 | 4,9903771  | 2016-Nov-30 | H5N8_1116.2 | AADAA8AA | w  | Wild-other    | purple |  |
| 268621_A_C_Gull_NL-Slootdorp_16014102-003_2016_H5N8_2016-Nov-11         | 52,8451344 | 4,9686855  | 2016-Nov-11 | H5N8_1116   | AAAAA8AA | w  | Wild-other    | red    |  |
| 268622_A_Ch_NL-Abbege_X16015736_2016_H5N8_2016-Dec-12                   | 53,0192891 | 5,5716955  | 2016-Dec-12 | H5N8_1116   | AAAAA8AA | d  | Dom-gal       | red    |  |
| 268623_A_Ch_NL-Boven_Leeuwen_16016151-006-010_2016_H5N8_2016-Dec-19     | 51,885586  | 5,551554   | 2016-Dec-19 | H5N8_1116   | AAAAA8AA | d  | Dom-gal       | red    |  |
| 268624_A_Ch_NL-Den_Oever_16014231-001_2016_H5N8_2016-Nov-15             | 52,9343779 | 5,0282699  | 2016-Nov-15 | H5N8_1116   | AAAAA8AA | w  | Dom-gal       | red    |  |
| 268625_A_Ch_NL-Hiaure_16016112-001-005_2016_H5N8_2016-Dec-17            | 53,3472454 | 5,9730214  | 2016-Dec-17 | H5N8_1116   | AAAAA8AA | d  | Dom-gal       | red    |  |
| 268626_A_Ch_NL-Rhenen_16016141-006_2016_H5N8_2016-Dec-17                | 51,9621397 | 5,5711155  | 2016-Dec-17 | H5N8_1116   | AAAAA8AA | d  | Dom-gal       | red    |  |
| 268627_A_Ch_NL-Zoeterwoude_16016484-021-025_2016_H5N8_2016-Dec-24       | 52,1208305 | 4,5165697  | 2016-Dec-24 | H5N8_1116   | AAAAA8AA | d  | Dom-gal       | red    |  |
| 268628_A_Crow_NL-Oostwoud_16015372-004_2016_H5N8_2016-Dec-05            | 52,7252238 | 5,0905909  | 2016-Dec-05 | H5N8_1116.2 | AADAA8AA | w  | Wild-other    | purple |  |
| 268629_A_Dk_NL-Biddinghuizen_16014829-011-015_2016_H5N8_2016-Nov-25     | 52,4552356 | 5,692693   | 2016-Nov-25 | H5N8_1116   | AAAAA8AA | w  | Wild-ans      | red    |  |
| 268630_A_Dk_NL-Biddinghuizen_16015083-016-020_2016_H5N8_2016-Nov-30     | 52,4552356 | 5,692693   | 2016-Nov-30 | H5N8_1116   | AAAAA8AA | w  | Wild-ans      | red    |  |
| 268631_A_Dk_NL-Biddinghuizen_16015145-021-025_2016_H5N8_2016-Dec-01     | 52,4552356 | 5,692693   | 2016-Dec-01 | H5N8_1116   | AAAAA8AA | w  | Wild-ans      | red    |  |
| 268632_A_Dk_NL-Kamperveen_16016104-001-005_2016_H5N8_2016-Dec-15        | 52,5092678 | 5,9151615  | 2016-Dec-15 | H5N8_1116   | AAAAA8AA | w  | Wild-ans      | red    |  |
| 268633_A_Dk_NL-Rotterdam_16014008-001-005_2016_H5N8_2016-Nov-10         | 51,9244201 | 4,4777326  | 2016-Nov-10 | H5N8_1116   | AAAAA8AA | na | Dom-ans       | red    |  |
| 268634_A_Dk_NL-Stolwijk_16016291-016-020_2016_H5N8_2016-Dec-21          | 51,9736881 | 4,7721019  | 2016-Dec-21 | H5N8_1116   | AAAAA8AA | w  | Wild-ans      | red    |  |
| 268635_A_Eur_Wig_NL-Akkrum_16015817-003_2016_H5N8_2016-Dec-13           | 53,0493736 | 5,8341466  | 2016-Dec-13 | H5N8_1116   | AAAAA8AA | w  | Wild-ans-long | red    |  |
| 268636_A_Eur_Wig_NL-De_Waal_Texel_16014891-003_2016_H5N8_2016-Nov-27    | 53,0729311 | 4,8201727  | 2016-Nov-27 | H5N8_1116   | AAAAA8AA | w  | Wild-ans-long | red    |  |
| 268637_A_Eur_Wig_NL-De_Waal_Texel_16014891-004_2016_H5N8_2016-Nov-27    | 53,0729311 | 4,8201727  | 2016-Nov-27 | H5N8_1116   | AAAAA8AA | w  | Wild-ans-long | red    |  |
| 268638_A_Eur_Wig_NL-Drieborg_Dollard_16015513-001_2016_H5N8_2016-Dec-06 | 53,2822961 | 7,1872298  | 2016-Dec-06 | H5N8_1116   | AAAAA8AA | w  | Wild-ans-long | red    |  |
| 268639_A_Eur_Wig_NL-Enumatil-                                           | 53,2156499 | 6,4071406  | 2016-Dec-11 | H5N8_1116   | AAAAA8AA | w  | Wild-ans-     | red    |  |

|                                                                               |            |           |             |             |          |   |               |        |
|-------------------------------------------------------------------------------|------------|-----------|-------------|-------------|----------|---|---------------|--------|
| Groningen_16015704-001_2016_H5N8_2016-Dec-11                                  |            |           |             |             |          |   | long          |        |
| 268640_A_Eur_Wig_NL-Ferwert_16015273-002_2016_H5N8_2016-Dec-01                | 53,3377628 | 5,824424  | 2016-Dec-01 | H5N8_1116   | AAAAA8AA | w | Wild-ans-long | red    |
| 268641_A_Eur_Wig_NL-Gouda_16015824-001_2016_H5N8_2016-Dec-13                  | 52,0115205 | 4,7104633 | 2016-Dec-13 | H5N8_1116   | AAAAA8AA | w | Wild-ans-long | red    |
| 268642_A_Eur_Wig_NL-Greonterp_16015653-001_2016_H5N8_2016-Dec-08              | 53,0155037 | 5,5190502 | 2016-Dec-08 | H5N8_1116   | AAAAA8AA | w | Wild-ans-long | red    |
| 268643_A_Eur_Wig_NL-Groningen_16015376-003_2016_H5N8_2016-Dec-05              | 53,2193835 | 6,5665017 | 2016-Dec-05 | H5N8_1116.2 | AADA8AA  | w | Wild-ans-long | purple |
| 268644_A_Eur_Wig_NL-Leeuwarden_16015699-002_2016_H5N8_2016-Dec-10             | 53,1971234 | 5,7964815 | 2016-Dec-10 | H5N8_1116   | AAAAA8AA | w | Wild-ans-long | red    |
| 268645_A_Eur_Wig_NL-Leidschendam_16015697-007_2016_H5N8_2016-Dec-10           | 52,0798176 | 4,3996122 | 2016-Dec-10 | H5N8_1116.2 | AADA8AA  | w | Wild-ans-long | purple |
| 268646_A_Eur_Wig_NL-Reeuwijk_16015903-003_2016_H5N8_2016-Dec-13               | 52,0459962 | 4,7235288 | 2016-Dec-13 | H5N8_1116   | AAAAA8AA | w | Wild-ans-long | red    |
| 268647_A_Eur_Wig_NL-Terschelling_16015692-010_2016_H5N8_2016-Dec-09           | 53,3978747 | 5,3466786 | 2016-Dec-09 | H5N8_1116   | AAAAA8AA | w | Wild-ans-long | red    |
| 268648_A_Eur_Wig_NL-Vianen_16015917-006_2016_H5N8_2016-Dec-13                 | 51,9902756 | 5,1030332 | 2016-Dec-13 | H5N8_1116   | AAAAA8AA | w | Wild-ans-long | red    |
| 268649_A_Eur_Wig_NL-Walterswald_16015923-003_2016_H5N8_2016-Dec-14            | 53,3007978 | 6,0313682 | 2016-Dec-14 | H5N8_1116   | AAAAA8AA | w | Wild-ans-long | red    |
| 268650_A_Eur_Wig_NL-West_Grafdijk_16015746-003_2016_H5N8_2016-Dec-12          | 52,5542536 | 4,7950025 | 2016-Dec-12 | H5N8_1116   | AAAAA8AA | w | Wild-ans-long | red    |
| 268651_A_Eur_Wig_NL-Wormer_16016143-002_2016_H5N8_2016-Dec-18                 | 52,4986623 | 4,8124621 | 2016-Dec-18 | H5N8_1116   | AAAAA8AA | w | Wild-ans-long | red    |
| 268652_A_Eur_Wig_NL-Zoeterwoude_16015702-010_2016_H5N8_2016-Dec-10            | 52,1208305 | 4,5165697 | 2016-Dec-10 | H5N8_1116   | AAAAA8AA | w | Wild-ans-long | red    |
| 268653_A_Eur_Wig_NL-Zwolle_16015820-002_2016_H5N8_2016-Dec-13                 | 52,5167747 | 6,0830219 | 2016-Dec-13 | H5N8_1116   | AAAAA8AA | w | Wild-ans-long | red    |
| 268654_A_G_c_grebe_NL-Monnickendam_16013865-009-010_2016_H5N8_2016-Nov-08     | 52,4555687 | 5,0392316 | 2016-Nov-08 | H5N8_1116.2 | AADA8AA  | w | Wild-other    | purple |
| 268655_A_Go_NL-Roggebotsluis_16014462-010_2016_H5N8_2016-Nov-17               | 52,55      | 5,85      | 2016-Nov-17 | H5N8_1116.2 | AADA8AA  | w | Wild-ans      | purple |
| 268656_A_Gr_bk_bd_gull_NL-Slootdorp_16014102-005_2016_H5N8_2016-Nov-11        | 52,8451344 | 4,9686855 | 2016-Nov-11 | H5N8_1116.2 | AADA8AA  | w | Wild-other    | purple |
| 268657_A_Grey_Go_NL-Groot-Ammers_16015901-012_2016_H5N8_2016-Dec-14           | 51,9246393 | 4,8253021 | 2016-Dec-14 | H5N8_1116   | AAAAA8AA | w | Wild-ans-long | red    |
| 268658_A_Gull_NL-Marker_Wadden_16014466-020_2016_H5N8_2016-Nov-17             | 52,6003207 | 5,3912293 | 2016-Nov-17 | H5N8_1116   | AAAAA8AA | w | Wild-other    | red    |
| 268659_A_Gull1_NL-Marker_Wadden_16014466-011_2016_H5N8_2016-Nov-17            | 52,6003207 | 5,3912293 | 2016-Nov-17 | H5N8_1116.2 | AADA8AA  | w | Wild-other    | purple |
| 268660_A_Gull10_NL-Marker_Wadden_16014466-014_2016_H5N8_2016-Nov-17           | 52,6003207 | 5,3912293 | 2016-Nov-17 | H5N8_1116   | AAAAA8AA | w | Wild-other    | red    |
| 268661_A_L-bl-ba-gull_NL-Sovon_16014324-014_2016_H5N8_2016-Nov-16             | 51,6414435 | 4,4748695 | 2016-Nov-16 | H5N8_1116.2 | AADA8AA  | w | Wild-other    | purple |
| 268662_A_M_Swan_NL-Roggebotsluis_16014462-019_2016_H5N8_2016-Nov-17           | 52,55      | 5,85      | 2016-Nov-17 | H5N8_1116   | AAAAA8AA | w | Wild-ans      | red    |
| 268663_A_Maggie_NL-Volendam_16014331-002_2016_H5N8_2016-Nov-16                | 52,5045411 | 5,045998  | 2016-Nov-16 | H5N8_1116.2 | AADA8AA  | w | Wild-other    | purple |
| 268664_A_Mal_NL-IJsselmuiden_16015448-002_2016_H5N8_2016-Dec-06               | 52,5653152 | 5,9325723 | 2016-Dec-06 | H5N8_1116   | AAAAA8AA | w | Wild-ans      | red    |
| 268665_A_Mal_NL-Mastenbroek_16015378-002_2016_H5N8_2016-Dec-05                | 52,5737209 | 6,0224387 | 2016-Dec-05 | H5N8_1116.2 | AADA8AA  | w | Wild-ans      | purple |
| 268666_A_P_falcon_NL-Vrouwenpolder_Zeeland_16015510-001_2016_H5N8_2016-Dec-07 | 51,5772562 | 3,6187496 | 2016-Dec-07 | H5N8_1116.2 | AADA8AA  | w | Wild-other    | purple |
| 268667_A_Sea_eagle_NL-Assen_16015398-002_2016_H5N8_2016-Dec-05                | 52,992753  | 6,5642284 | 2016-Dec-05 | H5N8_1116   | AAAAA8AA | w | Wild-other    | red    |
| 268668_A_T_DK_NL-Almeerder_Zand_16014341-003_2016_H5N8_2016-Nov-16            | 52,4105136 | 5,2496439 | 2016-Nov-16 | H5N8_1116   | AAAAA8AA | w | Wild-ans      | red    |
| 268669_A_T_DK_NL-Monnickendam_16013865-006-008_2016_H5N8_2016-Nov-08          | 52,4555687 | 5,0392316 | 2016-Nov-08 | H5N8_1116.2 | AADA8AA  | w | Wild-ans      | purple |
| 268670_A_T_DK_NL-Roggebotsluis_16014462-015_2016_H5N8_2016-Nov-17             | 52,55      | 5,85      | 2016-Nov-17 | H5N8_1116   | AAAAA8AA | w | Wild-ans      | red    |
| 268671_A_T_DK_NL-Rotterdam_16014155-001_2016_H5N8_2016-Nov-14                 | 51,9244201 | 4,4777326 | 2016-Nov-14 | H5N8_1116   | AAAAA8AA | w | Wild-ans      | red    |
| 268672_A_T_DK_NL-Werkendam_16014159-002_2016_H5N8_2016-Nov-14                 | 51,8081653 | 4,891848  | 2016-Nov-14 | H5N8_1116.2 | AADA8AA  | w | Wild-ans      | purple |
| 268673_A_T_DK_NL-Werkendam_16014159-003_2016_H5N8_2016-Nov-14                 | 51,8081653 | 4,891848  | 2016-Nov-14 | H5N8_1116.2 | AADA8AA  | w | Wild-ans      | purple |
| 268674_A_T_DK_NL-Zeewolde_16013976-001_2016_H5N8_2016-Nov-09                  | 52,331128  | 5,540495  | 2016-Nov-09 | H5N8_1116   | AAAAA8AA | w | Wild-ans      | red    |

|                                                                       |             |            |             |             |          |    |            |        |
|-----------------------------------------------------------------------|-------------|------------|-------------|-------------|----------|----|------------|--------|
| 268675_A_T_Dk_NL-Zeewolde_16013976-001-003_2016_H5N8_2016-Nov-09      | 52,331128   | 5,540495   | 2016-Nov-09 | H5N8_1116   | AAAAA8AA | w  | Wild-ans   | red    |
| 268676_A_T_Dk_NL-Zeewolde_16013976-004_2016_H5N8_2016-Nov-09          | 52,331128   | 5,540495   | 2016-Nov-09 | H5N8_1116   | AAAAA8AA | w  | Wild-ans   | red    |
| 268677_A_T_Dk_NL-Zeewolde_16013976-004-006_2016_H5N8_2016-Nov-09      | 52,331128   | 5,540495   | 2016-Nov-09 | H5N8_1116   | AAAAA8AA | w  | Wild-ans   | red    |
| 268678_A_T_Dk_NL-Zeewolde_16013976-005_2016_H5N8_2016-Nov-09          | 52,331128   | 5,540495   | 2016-Nov-09 | H5N8_1116   | AAAAA8AA | w  | Wild-ans   | red    |
| 268679_A_T_Dk_NL-Zeewolde_16013976-006_2016_H5N8_2016-Nov-09          | 52,331128   | 5,540495   | 2016-Nov-09 | H5N8_1116   | AAAAA8AA | w  | Wild-ans   | red    |
| 268680_A_T_Dk_NL-Zuidoost_Beemster_16014148-002_2016_H5N8_2016-Nov-14 | 52,5151991  | 4,9421222  | 2016-Nov-14 | H5N8_1116   | AAAAA8AA | w  | Wild-ans   | red    |
| 268681_A_T_Dk_NL-Zuidoost_Beemster_16014148-009_2016_H5N8_2016-Nov-14 | 52,5151991  | 4,9421222  | 2016-Nov-14 | H5N8_1116   | AAAAA8AA | w  | Wild-ans   | red    |
| 268682_A_Teal_NL-Ferwert_16015273-013_2016_H5N8_2016-Dec-01           | 53,3377628  | 5,824424   | 2016-Dec-01 | H5N8_1116   | AAAAA8AA | w  | Wild-ans   | red    |
| 268930_A_goose_Czech_Republic_136-17_1_2017_H5N8_2017-Jan-04          | 49,0947528  | 16,3690246 | 2017-Jan-04 | H5N8_1216.1 | BABAB8AA | d  | Dom-ans    | aqua   |
| 268940_A_mute_swan_Czech_Republic_1058-17_2017_H5N8_2017-Jan-18       | 48,9761906  | 14,472753  | 2017-Jan-18 | H5N8_1216.1 | BABAB8AA | w  | Wild-ans   | aqua   |
| 268941_A_mute_swan_Czech_Republic_1060-17_2017_H5N8_2017-Jan-19       | 48,9775553  | 14,5150747 | 2017-Jan-19 | H5N8_1216.1 | BABAB8AA | w  | Wild-ans   | aqua   |
| 268947_A_mallard_Czech_Republic_1219-17_1_2017_H5N8_2017-Jan-25       | 49,424893   | 13,8817644 | 2017-Jan-25 | H5N8_1216.1 | BABAB8AA | w  | Wild-ans   | aqua   |
| 271704_A_Goose_Hungary_17261_2017_H5N8_2017-Apr-18                    | 46,5661437  | 19,4272464 | 2017-Apr-18 | H5N8_1216.1 | BABAB8AA | na | Dom-ans    | aqua   |
| 271705_A_Goose_Hungary_15729_2017_H5N8_2017-Apr-07                    | 46,5661437  | 19,4272464 | 2017-Apr-07 | H5N8_1216.1 | BABAB8AA | na | Dom-ans    | aqua   |
| 271706_A_Goose_Hungary_17051_2017_H5N8_2017-Apr-18                    | 46,5661437  | 19,4272464 | 2017-Apr-18 | H5N8_1216.1 | BABAB8AA | na | Dom-ans    | aqua   |
| 271707_A_Goose_Hungary_17580_2017_H5N8_2017-Apr-19                    | 46,5661437  | 19,4272464 | 2017-Apr-19 | H5N8_1216.1 | BABAB8AA | na | Dom-ans    | aqua   |
| 271708_A_Goose_Hungary_17985_2017_H5N8_2017-Apr-20                    | 46,5661437  | 19,4272464 | 2017-Apr-20 | H5N8_1216.1 | BABAB8AA | na | Dom-ans    | aqua   |
| 271709_A_Goose_Hungary_59763_2016_H5N8_2016-Nov-27                    | 46,5661437  | 19,4272464 | 2016-Nov-27 | H5N8_1216.1 | BABAB8AA | d  | Dom-ans    | aqua   |
| 271710_A_Mulard_duck_Hungary_60369_2016_H5N8_2016-Nov-29              | 46,5661437  | 19,4272464 | 2016-Nov-29 | H5N8_1216.1 | BABAB8AA | d  | Dom-ans    | aqua   |
| 271711_A_Mulard_duck_Hungary_62902_2016_H5N8_2016-Dec-07              | 46,7084264  | 20,1436061 | 2016-Dec-07 | H5N8_1216.1 | BABAB8AA | d  | Dom-ans    | aqua   |
| 271712_A_Goose_Hungary_63743_2016_H5N8_2016-Dec-11                    | 46,5661437  | 19,4272464 | 2016-Dec-11 | H5N8_1216.1 | BABAB8AA | na | Dom-ans    | aqua   |
| 271713_A_Goose_Hungary_64909_2016_H5N8_2016-Dec-14                    | 46,5661437  | 19,4272464 | 2016-Dec-14 | H5N8_1216.1 | BABAB8AA | na | Dom-ans    | aqua   |
| 271714_A_Mulard_duck_Hungary_59163_2016_H5N8_2016-Nov-24              | 46,5661437  | 19,4272464 | 2016-Nov-24 | H5N8_1216.1 | BABAB8AA | d  | Dom-ans    | aqua   |
| 272859_A_grey_heron_W779_2017_H5N8_2017-Jan-27                        | 35,907757   | 127,766922 | 2017-Jan-27 | H5N8_0916   | CAEAF8AA | w  | Wild-other | green  |
| 273846_A_chicken_Italy_17VIR3078_2017_H5N8_2017-Apr-07                | 44,3951148  | 11,8101028 | 2017-Apr-07 | H5N8_1116   | AAAAA8AA | d  | Dom-gal    | red    |
| 273847_A_turkey_Italy_17VIR5878-3_2017_H5N8_2017-Jul-23               | 45,3169971  | 11,2761608 | 2017-Jul-23 | H5N8_1116   | AAAAA8AA | d  | Dom-gal    | red    |
| 274858_A_mute_swan_Kaliningrad_132_2017_H5N8_2017-Feb-13              | 54,8235292  | 21,4816162 | 2017-Feb-13 | H5N8_1116.2 | AADA8AA  | w  | Wild-ans   | purple |
| 275283_A_chicken_Schtyolkovo_47_2017_H5N8_2017-Mar-05                 | 55,917038   | 38,0369348 | 2017-Mar-05 | H5N8_1116   | AAAAA8AA | d  | Dom-gal    | red    |
| 275287_A_chicken_Rostov-on-Don_44_2017_H5N8_2017-Apr-18               | 47,6853247  | 41,8258952 | 2017-Apr-18 | H5N8_1116   | AAAAA8AA | d  | Dom-gal    | red    |
| 275288_A_chicken_Tatarstan_88_2017_H5N8_2017-May-08                   | 55,1802364  | 50,7263945 | 2017-May-08 | H5N8_1116   | AAAAA8AA | d  | Dom-gal    | red    |
| 277134_A_swan_Germany-ST_AR3396-L02292_2017_H5N8_2017-Aug-22          | 51,5509411  | 11,4071798 | 2017-Aug-22 | H5N8_1116   | AAAAA8AA | w  | Wild-ans   | red    |
| 277135_A_swan_Germany-ST_AR3397-L02293_2017_H5N8_2017-Aug-22          | 51,5509411  | 11,4071798 | 2017-Aug-22 | H5N8_1116   | AAAAA8AA | w  | Wild-ans   | red    |
| 277137_A_swan_Germany-ST_AR1166-L02295_2017_H5N8_2017-Feb-02          | 51,5509411  | 11,4071798 | 2017-Feb-02 | H5N8_1216.2 | BDBAB8AA | w  | Wild-ans   | blue   |
| 280672_A_buzzard_Germany-ST_AR1959-L02305_2017_H5N8_2017-Feb-28       | 51,5509411  | 11,4071798 | 2017-Feb-28 | H5N8_1216.2 | BDBAB8AA | w  | Wild-other | blue   |
| 280674_A_mute_swan_Switzerland_V0244_2-L02307_2017_H5N8_2017-Aug-10   | 46,7784736  | 6,641183   | 2017-Aug-10 | H5N8_1116   | AAAAA8AA | w  | Wild-ans   | red    |
| 282133_A_turkey_Czech_Republic_38-17_1_2017_H5N8_2017-Jan-03          | 49,0947528  | 16,3690246 | 2017-Jan-03 | H5N8_1216.1 | BABAB8AA | d  | Dom-gal    | aqua   |
| 282141_A_swan_Italy_17VIR7064-1_2017_H5N8_2017-Aug-25                 | 45,4692736  | 9,6827845  | 2017-Aug-25 | H5N8_1116   | AAAAA8AA | w  | Wild-ans   | red    |
| 282143_A_goose_Italy_17VIR6358-3_2017_H5N8_2017-Aug-05                | 45,1495718  | 9,4859449  | 2017-Aug-05 | H5N8_1116   | AAAAA8AA | d  | Dom-ans    | red    |
| 283129_A_chicken_Czech_Republic_988-17_2017_H5N8_2017-Jan-20          | 49,4270709  | 17,4488408 | 2017-Jan-20 | H5N8_1216.1 | BABAB8AA | d  | Dom-gal    | aqua   |
| 284004_A_Chicken_South_Africa_S2017_08_03_36_P3_2017_H5N8_2017-Aug-21 | -33,2277918 | 21,8568586 | 2017-Aug-21 | H5N8_0916   | CAEAF8AA | d  | Dom-gal    | green  |
| 285601_A_Geese_South_Africa_S2017_09_006_5_P1_2017_H5N8_2017-Sep-04   | -33,2277918 | 21,8568586 | 2017-Sep-04 | H5N8_0916   | CAEAF8AA | na | Wild-ans   | green  |
| 285602_A_Geese_South_Africa_S2017_09_006                              | -33,2277918 | 21,8568586 | 2017-Sep-04 | H5N8_0916   | CAEAF8AA | na | Wild-ans   | green  |

|                                                                         |             |             |             |             |          |    |               |            |  |
|-------------------------------------------------------------------------|-------------|-------------|-------------|-------------|----------|----|---------------|------------|--|
| 5_P2_2017_H5N8_2017-Sep-04                                              |             |             |             |             |          |    |               |            |  |
| 285604_A_Ostrich_South_Africa_S2017_08_004_6_P3_2017_H5N8_2017-Aug-03   | -33,2277918 | 21,8568586  | 2017-Aug-03 | H5N8_0916   | CAEAF8AA | na | Wild-ans      | green      |  |
| 285606_A_Duck_South_Africa_S2017_08_0340_P1_2017_H5N8_2017-Aug-22       | -33,2277918 | 21,8568586  | 2017-Aug-22 | H5N8_0916   | CAEAF8AA | na | Wild-ans      | green      |  |
| 285624_A_Chicken_South_Africa_S2017_09_00_50_56_2017_H5N8_2017-Sep-04   | -33,2277918 | 21,8568586  | 2017-Sep-04 | H5N8_0916   | CAEAF8AA | na | Dom-gal       | green      |  |
| 285648_A_Geese_South_Africa_S2017_09_005_5_P1_2017_H5N8_2017-Sep-04     | -33,2277918 | 21,8568586  | 2017-Sep-04 | H5N8_0916   | CAEAF8AA | na | Wild-ans      | green      |  |
| 285649_A_Chicken_South_Africa_S2017_09_01_84_63_2017_H5N8_2017-Sep-08   | -33,2277918 | 21,8568586  | 2017-Sep-08 | H5N8_0916   | CAEAF8AA | d  | Dom-gal       | green      |  |
| 285650_A_Ostrich_South_Africa_S2017_08_004_6_AF_2017_H5N8_2017-Aug-03   | -33,2277918 | 21,8568586  | 2017-Aug-03 | H5N8_0916   | CAEAF8AA | na | Wild-other    | green      |  |
| 285651_A_Guineafowl_South_Africa_S2017_08_0190_9_2017_H5N8_2017-Aug-14  | -33,2277918 | 21,8568586  | 2017-Aug-14 | H5N8_0916   | CAEAF8AA | w  | Wild-other    | green      |  |
| 285652_A_Guineafowl_South_Africa_S2017_08_0243_P2_2017_H5N8_2017-Aug-16 | -33,2277918 | 21,8568586  | 2017-Aug-16 | H5N8_0916   | CAEAF8AA | na | Wild-other    | green      |  |
| 285655_A_Geese_South_Africa_S2017_08_055_8_P1_2017_H5N8_2017-Aug-29     | -33,2277918 | 21,8568586  | 2017-Aug-29 | H5N8_0916   | CAEAF8AA | na | Wild-ans      | green      |  |
| 285658_A_Chicken_South_Africa_S2017_08_05_61_P1_2017_H5N8_2017-Aug-29   | -33,2277918 | 21,8568586  | 2017-Aug-29 | H5N8_0916   | CAEAF8AA | na | Dom-gal       | green      |  |
| 287564_A_T_DK_NL-Werkendam_16014159-001_2016_H5N5_2016-Nov-14           | 51,8081653  | 4,891848    | 2016-Nov-14 | H5N5_1116.2 | AAGAA5AA | w  | Wild-ans      | blueviolet |  |
| 287565_A_M_Swan_NL-Groningen_16015826-001_2016_H5N5_2016-Dec-13         | 53,2193835  | 6,5665017   | 2016-Dec-13 | H5N5_1216.1 | DCBAE5AA | w  | Wild-ans      | orange     |  |
| 287800_A_spoonbill_Taiwan_DB645_2017_H5N6_2017-Dec-01                   | 23,69781    | 120,960515  | 2017-Dec-01 | H5N6_0217   | NA       | w  | Wild-other    | pink       |  |
| 287906_A_Duck_Netherlands_17017236-001-005_2017_H5N6_2017-Dec-07        | 52,4552356  | 5,692693    | 2017-Dec-07 | H5N6_1217.2 | NA       | d  | Dom-ans       | fuchsia    |  |
| 287907_A_Duck_Netherlands_17017237-001-005_2017_H5N6_2017-Dec-07        | 52,4552356  | 5,692693    | 2017-Dec-07 | H5N6_1217.2 | NA       | d  | Dom-ans       | fuchsia    |  |
| 288362_A_chicken_Greece_39_2017_2017_H5N6_2017-Feb-06                   | 39,074208   | 21,824312   | 2017-Feb-06 | H5N6_0217   | AAAAA6AA | d  | Dom-gal       | lightpink  |  |
| 288363_A_chicken_Greece_39_2017a_2017_H5N6_2017-Feb-06                  | 39,074208   | 21,824312   | 2017-Feb-06 | H5N6_0217   | AAAAA6AA | d  | Dom-gal       | lightpink  |  |
| 288364_A_chicken_Greece_39_2017b_2017_H5N6_2017-Feb-06                  | 39,074208   | 21,824312   | 2017-Feb-06 | H5N6_0217   | AAAAA6AA | d  | Dom-gal       | lightpink  |  |
| 288409_A_Mute_Swan_Netherlands_17017367-012_2017_H5N6_2017-Dec-09       | 52,3624138  | 5,7252759   | 2017-Dec-09 | H5N6_1217.2 | NA       | w  | Wild-ans      | fuchsia    |  |
| 288410_A_Mute_Swan_Netherlands_17017377-001_2017_H5N6_2017-Dec-09       | 52,4492631  | 5,8345193   | 2017-Dec-09 | H5N6_1217.2 | NA       | w  | Wild-ans      | fuchsia    |  |
| 288412_A_Tufted_Duck_Netherlands_17017367-007_2017_H5N6_2017-Dec-09     | 52,3624138  | 5,7252759   | 2017-Dec-09 | H5N6_1217.2 | NA       | w  | Wild-ans      | fuchsia    |  |
| 288436_A_mallard_Korea_Jeju-H24_2017_H5N6_2017-Nov-27                   | 33,4890113  | 126,4983023 | 2017-Nov-27 | H5N6_0217   | NA       | na | Wild-ans      | pink       |  |
| 288437_A_duck_Korea_HD1_2017_H5N6_2017-Nov-17                           | 35,907757   | 127,766922  | 2017-Nov-17 | H5N6_0217   | NA       | na | Wild-ans      | pink       |  |
| 288438_A_chicken_Korea_Gunsan_2017_H5N8_2017-Jun-03                     | 35,907757   | 127,766922  | 2017-Jun-03 | H5N8_0916   | CAEAF8AA | d  | Dom-gal       | green      |  |
| 288734_A_mute_swan_Germany-NW_AR108_2017_H5N8_2017-Jan                  | 51,2277411  | 6,7734556   | 2017-Jan    | H5N8_1116   | AAAAA8AA | w  | Wild-ans      | red        |  |
| 288736_A_mute_swan_Germany-RP_AR416_2017_H5N8_2017-Jan                  | 50,0324264  | 7,1964981   | 2017-Jan    | H5N8_1216.2 | BDBAB8AA | w  | Wild-ans      | blue       |  |
| 288737_A_greylag_goose_Germany-HH_AR477_2017_H5N8_2017-Jan              | 53,5510846  | 9,9936819   | 2017-Jan    | H5N8_1216.2 | BDBAB8AA | w  | Wild-ans-long | blue       |  |
| 288746_A_mute_swan_Germany-BY_AR857_2017_H5N8_2017-Jan-01               | 50,0494605  | 9,7059316   | 2017-Jan-01 | H5N8_1216.1 | BABAB8AA | w  | Wild-ans      | aqua       |  |
| 288747_A_tufted_duck_Germany-RP_AR1181_2017_H5N8_2017-Feb               | 50,5061497  | 7,28973     | 2017-Feb    | H5N8_1116   | AAAAA8AA | w  | Wild-ans      | red        |  |
| 289068_A_great_egret_Germany-HE_AR1208_2017_H5N8_2017-Feb               | 50,5840512  | 8,6784031   | 2017-Feb    | H5N8_1216.1 | BABAB8AA | w  | Wild-other    | aqua       |  |
| 289173_A_mute_swan_Shimane_3211A001_2017_H5N6_2017-Nov-05               | 35,4722952  | 133,0504997 | 2017-Nov-05 | H5N6_0217   | NA       | w  | Wild-ans      | pink       |  |
| 289713_A_Great_Black-backed_Gull_Netherlands_1_2017_H5N6_2017-Dec-18    | 52,799529   | 5,226264    | 2017-Dec-18 | H5N6_1217.1 | NA       | w  | Wild-other    | hotpink    |  |
| 289714_A_Black-headed_Gull_Netherlands_29_2017_H5N6_2017-Dec-18         | 52,7417364  | 5,1809356   | 2017-Dec-18 | H5N6_1217.2 | NA       | w  | Wild-other    | fuchsia    |  |
| 291103_A_mute_swan_Germany-HE_AR195_2017_H5N8_2017-Jan                  | 50,6520515  | 9,1624376   | 2017-Jan    | H5N8_1216.2 | BDBAB8AA | w  | Wild-ans      | blue       |  |
| 291109_A_common_pochard_Germany-BY_AR09-18-L02421_2017_H5N6_2017-Dec-28 | 48,2629984  | 11,4339022  | 2017-Dec-28 | H5N6_1217.2 | NA       | w  | Wild-ans      | fuchsia    |  |
| 291110_A_mute_swan_Switzerland_V361-L02422_2017_H5N6_2017-Dec-18        | 47,0434885  | 7,0968065   | 2017-Dec-18 | H5N6_1217.2 | NA       | w  | Wild-ans      | fuchsia    |  |
| 292223_A_mute_swan_England_AVP_18_00198_6_2017_H5N6_2017-Dec-31         | 50,6655598  | -2,5995788  | 2017-Dec-31 | H5N6_1217.2 | NA       | w  | Wild-ans      | fuchsia    |  |
| 292224_A_pochard_duck_England_AVP_18_003_254_2018_H5N6_2018-Jan-10      | 50,6655598  | -2,5995788  | 2018-Jan-10 | H5N6_1217.2 | NA       | w  | Wild-ans      | fuchsia    |  |
| 292225_A_canada_goose_England_AV58_180P_poolEP1_2018_H5N6_2018-Jan-05   | 50,6655598  | -2,5995788  | 2018-Jan-05 | H5N6_1217.2 | NA       | w  | Wild-ans      | fuchsia    |  |
| 295027_A_chicken_Kostroma_1718_2017_H5N2_2017-Dec-22                    | 57,7774816  | 40,9698928  | 2017-Dec-22 | H5N2_1217   | NA       | d  | Dom-gal       | brown      |  |
| 297234_A_chicken_Rostov-on-Don_1321_2017_H5N8_2017-Oct-18               | 47,2357137  | 39,701505   | 2017-Oct-18 | H5N8_1216.2 | BDBAB8AA | w  | Dom-gal       | blue       |  |

|                                                                  |            |             |             |             |          |    |               |         |
|------------------------------------------------------------------|------------|-------------|-------------|-------------|----------|----|---------------|---------|
| 297235_A_chicken_Rostov-on-Don_1598_2017_H5N8_2017-Nov-17        | 47,6853247 | 41,8258952  | 2017-Nov-17 | H5N8_1116   | AAAAA8AA | d  | Dom-gal       | red     |
| 297388_A_chicken_Republic_of_Macedonia_466_2017_H5N8_2017-Jan-28 | 41,3173744 | 20,6645683  | 2017-Jan-28 | H5N8_1216.1 | BABAB8AA | d  | Dom-gal       | aqua    |
| 297463_A_chicken_Kostroma_1717_2017_H5N2_2017-Dec-22             | 57,7774816 | 40,9698928  | 2017-Dec-22 | H5N2_1217   | NA       | d  | Dom-gal       | brown   |
| 297464_A_chicken_Kostroma_1719_2017_H5N2_2017-Dec-22             | 57,7774816 | 40,9698928  | 2017-Dec-22 | H5N2_1217   | NA       | d  | Dom-gal       | brown   |
| 297465_A_chicken_Kostroma_1720_2017_H5N2_2017-Dec-22             | 57,7774816 | 40,9698928  | 2017-Dec-22 | H5N2_1217   | NA       | d  | Dom-gal       | brown   |
| 297466_A_chicken_Kostroma_1721_2017_H5N2_2017-Dec-22             | 57,7774816 | 40,9698928  | 2017-Dec-22 | H5N2_1217   | NA       | d  | Dom-gal       | brown   |
| 300547_A_White-fronted_Goose_AN_1-15-12_2016_H5N8_2016-Dec-15    | 48,379433  | 31,1655799  | 2016-Dec-15 | H5N8_1116   | AAAAA8AA | w  | Wild-ans-long | red     |
| 300548_A_Ruddy_Shelduck_AN_2-14-12_2016_H5N8_2016-Dec-14         | 46,635417  | 32,616867   | 2016-Dec-14 | H5N8_1116   | AAAAA8AA | w  | Wild-ans      | red     |
| 300562_A_Environmental_EM__AN_2_17_H5N8_2017-Jan-27              | 46,635417  | 32,616867   | _AN_2_17    | H5N8_1116   | AAAAA8AA | na | Wild-other    | red     |
| 300686_A_turkey_Poland_63_2016_H5N8_2016-Dec-12                  | 52,2274612 | 15,2559103  | 2016-Dec-12 | H5N8_1216.2 | BDBAB8AA | d  | Dom-gal       | blue    |
| 300687_A_chicken_Poland_34_2017_H5N8_2017-Jan-11                 | 49,7225306 | 20,2503358  | 2017-Jan-11 | H5N8_1216.2 | BDBAB8AA | d  | Dom-gal       | blue    |
| 300693_A_domestic_duck_Poland_47_2017_H5N8_2017-Jan-16           | 52,279986  | 17,3522939  | 2017-Jan-16 | H5N8_1216.1 | BABAB8AA | d  | Dom-ans       | aqua    |
| 300698_A_turkey_Poland_54_2017_H5N8_2017-Jan-18                  | 51,8927182 | 21,0021679  | 2017-Jan-18 | H5N8_1216.1 | BABAB8AA | d  | Dom-gal       | aqua    |
| 300699_A_domestic_goose_Poland_69_2017_H5N8_2017-Jan-27          | 52,279986  | 17,3522939  | 2017-Jan-27 | H5N8_1216.2 | BDBAB8AA | d  | Dom-ans       | blue    |
| 300700_A_turkey_Poland_72_2017_H5N8_2017-Jan-27                  | 53,8671117 | 20,7027861  | 2017-Jan-27 | H5N8_1216.1 | BABAB8AA | d  | Dom-gal       | aqua    |
| 300701_A_turkey_Poland_94_2017_H5N8_2017-Feb-03                  | 52,279986  | 17,3522939  | 2017-Feb-03 | H5N8_1216.2 | BDBAB8AA | d  | Dom-gal       | blue    |
| 300702_A_chicken_Poland_101_2017_H5N8_2017-Feb-03                | 51,1339861 | 16,8841961  | 2017-Feb-03 | H5N8_1216.2 | BDBAB8AA | d  | Dom-gal       | blue    |
| 300703_A_domestic_goose_Poland_124_2017_H5N8_2017-Feb-06         | 51,1339861 | 16,8841961  | 2017-Feb-06 | H5N8_1216.1 | BABAB8AA | d  | Dom-ans       | aqua    |
| 300704_A_turkey_Poland_192_2017_H5N8_2017-Feb-20                 | 53,0697159 | 22,9674639  | 2017-Feb-20 | H5N8_1216.1 | BABAB8AA | d  | Dom-gal       | aqua    |
| 300712_A_chicken_Poland_263_2017_H5N8_2017-Mar-04                | 52,2274612 | 15,2559103  | 2017-Mar-04 | H5N8_1216.1 | BABAB8AA | d  | Dom-gal       | aqua    |
| 300743_A_mallard_Poland_17_2017_H5N8_2017-Jan-13                 | 53,4657891 | 15,1822581  | 2017-Jan-13 | H5N8_1216.2 | BDBAB8AA | w  | Wild-ans      | blue    |
| 300744_A_swan_Poland_32_2017_H5N8_2017-Jan-19                    | 49,7225306 | 20,2503358  | 2017-Jan-19 | H5N8_1216.1 | BABAB8AA | w  | Wild-ans      | aqua    |
| 300745_A_wild_duck_Poland_57_2017_H5N8_2017-Jan-27               | 52,2274612 | 15,2559103  | 2017-Jan-27 | H5N8_1116   | AAAAA8AA | w  | Wild-ans      | red     |
| 300746_A_swan_Poland_81_2017_H5N5_2017-Feb-02                    | 51,1339861 | 16,8841961  | 2017-Feb-02 | H5N5_1216.1 | DCBAE5AA | w  | Wild-ans      | orange  |
| 300747_A_mute_swan_Poland_137_2017_H5N8_2017-Feb-21              | 54,2944252 | 18,1531164  | 2017-Feb-21 | H5N8_1116   | AAAAA8AA | w  | Wild-ans      | red     |
| 303637_A_Mandarin_duck_Korea_K17-1887_2017_H5N6_2017-Dec-23      | 36,5184    | 126,8       | 2017-Dec-23 | H5N6_1217.1 | NA       | w  | Wild-ans      | hotpink |
| 303638_A_Mandarin_duck_Korea_K17-1889_2017_H5N6_2017-Dec-23      | 36,5184    | 126,8       | 2017-Dec-23 | H5N6_1217.1 | NA       | w  | Wild-ans      | hotpink |
| 303639_A_Mandarin_duck_Korea_K17-1891_2017_H5N6_2017-Dec-23      | 36,5184    | 126,8       | 2017-Dec-23 | H5N6_1217.1 | NA       | w  | Wild-ans      | hotpink |
| 303640_A_Mandarin_duck_Korea_K17-1893_2017_H5N6_2017-Dec-23      | 36,5184    | 126,8       | 2017-Dec-23 | H5N6_1217.1 | NA       | w  | Wild-ans      | hotpink |
| 303641_A_Mandarin_duck_Korea_K17-1894_2017_H5N6_2017-Dec-23      | 36,5184    | 126,8       | 2017-Dec-23 | H5N6_1217.1 | NA       | w  | Wild-ans      | hotpink |
| 303642_A_Mandarin_duck_Korea_K17-1896_2017_H5N6_2017-Dec-23      | 36,5184    | 126,8       | 2017-Dec-23 | H5N6_1217.1 | NA       | w  | Wild-ans      | hotpink |
| 303643_A_Mandarin_duck_Korea_K18-3_2018_H5N6_2018-Jan-18         | 36,5184    | 126,8       | 2018-Jan-18 | H5N6_1217.1 | NA       | w  | Wild-ans      | hotpink |
| 304701_A_greylag_goose_Germany-HE_AR1667_2017_H5N8_2017-Feb      | 50,1805574 | 8,7955644   | 2017-Feb    | H5N8_1216.1 | BABAB8AA | w  | Wild-ans-long | aqua    |
| 305416_A_Domestic_Duck_Netherlands EMC-2_2018_H5N6_2018-Mar-13   | 52,5321284 | 5,9490114   | 2018-Mar-13 | H5N6_1217.2 | NA       | d  | Dom-ans       | fuchsia |
| 305417_A_Domestic_Duck_Netherlands EMC-6_2018_H5N6_2018-Mar-13   | 52,5321284 | 5,9490114   | 2018-Mar-13 | H5N6_1217.2 | NA       | d  | Dom-ans       | fuchsia |
| 305453_A_chicken_Germany-SH_AR163-L02542_2018_H5N6_2018-Mar-19   | 54,4637993 | 8,5533346   | 2018-Mar-19 | H5N6_1217.2 | NA       | d  | Dom-gal       | fuchsia |
| 305454_A_chicken_Germany-SH_AR164-L02543_2018_H5N6_2018-Mar-19   | 54,4637993 | 8,5533346   | 2018-Mar-19 | H5N6_1217.2 | NA       | d  | Dom-gal       | fuchsia |
| 305455_A_duck_Germany-SH_AR165-L02543_2018_H5N6_2018-Mar-19      | 54,4637993 | 8,5533346   | 2018-Mar-19 | H5N6_1217.2 | NA       | d  | Dom-ans       | fuchsia |
| 306989_A_turkey_Germany-SH_AR185-L02549_2018_H5N6_2018-Mar-19    | 54,4637993 | 8,5533346   | 2018-Mar-19 | H5N6_1217.2 | NA       | d  | Dom-gal       | fuchsia |
| 308781_A_jungle_crow_Hyogo_2803A002_2018_H5N6_2018-Mar-01        | 34,6912688 | 135,1830706 | 2018-Mar-01 | H5N6_0217   | NA       | w  | Wild-other    | pink    |
| 308782_A_jungle_crow_Hyogo_2803E011_2018_H5N6_2018-Mar-03        | 34,6912688 | 135,1830706 | 2018-Mar-03 | H5N6_0217   | NA       | w  | Wild-other    | pink    |
| 308783_A_jungle_crow_Hyogo_2803E022_2018_H5N6_2018-Mar-06        | 34,6912688 | 135,1830706 | 2018-Mar-06 | H5N6_0217   | NA       | w  | Wild-other    | pink    |
| 308802_A_duck_Democratic_Republic_of_the_                        | -4,038333  | 21,758664   | 2017-May-15 | H5N8_0516   | CABAD8AA | na | Dom-ans       | lime    |



|                                                                                 |            |             |             |             |          |    |            |         |  |
|---------------------------------------------------------------------------------|------------|-------------|-------------|-------------|----------|----|------------|---------|--|
| Congo_17RS882-29_2017_H5N8_2017-May-15                                          |            |             |             |             |          |    |            |         |  |
| 308803_A_duck_Democratic_Republic_of_the_Congo_17RS882-33_2017_H5N8_2017-May-14 | -4,038333  | 21,758664   | 2017-May-14 | H5N8_0516   | CABAD8AA | na | Dom-ans    | lime    |  |
| 308804_A_duck_Democratic_Republic_of_the_Congo_17RS882-40_2017_H5N8_2017-May-13 | -4,038333  | 21,758664   | 2017-May-13 | H5N8_0516   | CABAD8AA | na | Dom-ans    | lime    |  |
| 308805_A_duck_Democratic_Republic_of_the_Congo_17RS882-5_2017_H5N8_2017-May-14  | -4,038333  | 21,758664   | 2017-May-14 | H5N8_0516   | CABAD8AA | na | Dom-ans    | lime    |  |
| 309197_A_Brahma_chicken_Belgium_6153_2017_H5N8_2017-Jun-15                      | 50,503887  | 4,469936    | 2017-Jun-15 | H5N8_1116   | AAAAA8AA | d  | Dom-gal    | red     |  |
| 309198_A_Guinea_fowl_Belgium_6102_2017_H5N8_2017-Jun-14                         | 50,503887  | 4,469936    | 2017-Jun-14 | H5N8_1116   | AAAAA8AA | d  | Dom-gal    | red     |  |
| 312376_A_Armenian_Gull_Republic_of_Georgia_4_2017_H5N6_2017-Dec-27              | 41,7151377 | 44,827096   | 2017-Dec-27 | H5N6        | NA       | w  | Wild-other | silver  |  |
| 313226_A_white_stork_Germany-NI_AR251_2018_H5N6_2018-Apr                        | 52,6353154 | 8,1727077   | 2018-Apr    | H5N6_1217.2 | NA       | w  | Wild-other | fuchsia |  |
| 313227_A_buzzard_Germany-NRW_AR279_2018_H5N6_2018-May                           | 52,1759015 | 8,5988205   | 2018-May    | H5N6_1217.2 | NA       | w  | Wild-other | fuchsia |  |
| 319652_A_tufted_duck_Shimane_3211TY001_2017_H5N6_2017-Nov-07                    | 35,4722952 | 133,0504997 | 2017-Nov-07 | H5N6_0217   | NA       | w  | Wild-ans   | pink    |  |
| 320607_A_chicken_Kursk_284_2018_H5N8_2018-Jun-11                                | 51,7091957 | 36,1562241  | 2018-Jun-11 | H5N8_1116   | AAAAA8AA | d  | Dom-gal    | maroon  |  |
| 320608_A_chicken_Kursk_526_2018_H5N8_2018-Jun-15                                | 51,7091957 | 36,1562241  | 2018-Jun-15 | H5N8_1116   | AAAAA8AA | d  | Dom-gal    | maroon  |  |
| 320657_A_chicken_Samara_446_2018_H5N8_2018-Jun-22                               | 53,2415041 | 50,2212463  | 2018-Jun-22 | H5N8_1116   | AAAAA8AA | d  | Dom-gal    | maroon  |  |
| 320658_A_chicken_Samara_447_2018_H5N8_2018-Jun-22                               | 53,2415041 | 50,2212463  | 2018-Jun-22 | H5N8_1116   | AAAAA8AA | d  | Dom-gal    | maroon  |  |
| 320659_A_duck_Samara_452_2018_H5N8_2018-Jun-22                                  | 53,2415041 | 50,2212463  | 2018-Jun-22 | H5N8_1116   | AAAAA8AA | d  | Dom-ans    | maroon  |  |
| 320660_A_goose_Samara_455_2018_H5N8_2018-Jun-22                                 | 53,2415041 | 50,2212463  | 2018-Jun-22 | H5N8_1116   | AAAAA8AA | d  | Dom-ans    | maroon  |  |
| 320661_A_goose_Samara_459_2018_H5N8_2018-Jun-22                                 | 53,2415041 | 50,2212463  | 2018-Jun-22 | H5N8_1116   | AAAAA8AA | d  | Dom-ans    | maroon  |  |
| 320662_A_chicken_Penza_300_2018_H5N8_2018-Jun-15                                | 53,2272903 | 45          | 2018-Jun-15 | H5N8_1116   | AAAAA8AA | d  | Dom-gal    | maroon  |  |
| 320663_A_chicken_Penza_301_2018_H5N8_2018-Jun-15                                | 53,2272903 | 45          | 2018-Jun-15 | H5N8_1116   | AAAAA8AA | d  | Dom-gal    | maroon  |  |
| 320664_A_chicken_Orel_533_2018_H5N8_2018-Jun-20                                 | 52,9668468 | 36,0624898  | 2018-Jun-20 | H5N8_1116   | AAAAA8AA | d  | Dom-gal    | maroon  |  |
| 320674_A_chicken_Rostov-on-Don_766_2018_H5N8_2018-Jul-09                        | 47,2357137 | 39,701505   | 2018-Jul-09 | H5N8_1116   | AAAAA8AA | d  | Dom-gal    | maroon  |  |
| 320675_A_turkey_Rostov-on-Don_817_2018_H5N8_2018-Jul-16                         | 47,2357137 | 39,701505   | 2018-Jul-16 | H5N8_1116   | AAAAA8AA | d  | Dom-gal    | maroon  |  |
| 320676_A_chicken_Penza_605_2018_H5N8_2018-Jun-19                                | 53,2272903 | 45          | 2018-Jun-19 | H5N8_1116   | AAAAA8AA | d  | Dom-gal    | maroon  |  |
| 320677_A_chicken_Penza_607_2018_H5N8_2018-Jun-19                                | 53,2272903 | 45          | 2018-Jun-19 | H5N8_1116   | AAAAA8AA | d  | Dom-gal    | maroon  |  |
| 320678_A_chicken_Cheboksary_805_2018_H5N8_2018-Jul-16                           | 56,1167663 | 47,262782   | 2018-Jul-16 | H5N8_1116   | AAAAA8AA | d  | Dom-gal    | maroon  |  |
| 320679_A_chicken_Cheboksary_806_2018_H5N8_2018-Jul-16                           | 56,1167663 | 47,262782   | 2018-Jul-16 | H5N8_1116   | AAAAA8AA | d  | Dom-gal    | maroon  |  |
| 320680_A_chicken_Kursk_757_2018_H5N8_2018-Jun-20                                | 51,7091957 | 36,1562241  | 2018-Jun-20 | H5N8_1116   | AAAAA8AA | d  | Dom-gal    | maroon  |  |
| 320681_A_chicken_Kursk_760_2018_H5N8_2018-Jun-26                                | 51,7091957 | 36,1562241  | 2018-Jun-26 | H5N8_1116   | AAAAA8AA | d  | Dom-gal    | maroon  |  |
| 320682_A_chicken_Kursk_762_2018_H5N8_2018-Jun-26                                | 51,7091957 | 36,1562241  | 2018-Jun-26 | H5N8_1116   | AAAAA8AA | d  | Dom-gal    | maroon  |  |
| 320683_A_goose_Samara_673_2018_H5N8_2018-Jul-04                                 | 53,2415041 | 50,2212463  | 2018-Jul-04 | H5N8_1116   | AAAAA8AA | d  | Dom-ans    | maroon  |  |
| 320684_A_goose_Samara_675_2018_H5N8_2018-Jul-04                                 | 53,2415041 | 50,2212463  | 2018-Jul-04 | H5N8_1116   | AAAAA8AA | d  | Dom-ans    | maroon  |  |
| 320685_A_chicken_Samara_679_2018_H5N8_2018-Jul-04                               | 53,2415041 | 50,2212463  | 2018-Jul-04 | H5N8_1116   | AAAAA8AA | d  | Dom-gal    | maroon  |  |
| 320953_A_chicken_Cheboksary_849_2018_H5N8_2018-Jul-20                           | 56,1167663 | 47,262782   | 2018-Jul-20 | H5N8_1116   | AAAAA8AA | d  | Dom-gal    | maroon  |  |
| 320954_A_chicken_Cheboksary_850_2018_H5N8_2018-Jul-20                           | 56,1167663 | 47,262782   | 2018-Jul-20 | H5N8_1116   | AAAAA8AA | d  | Dom-gal    | maroon  |  |
| 320955_A_chicken_Cheboksary_851_2018_H5N8_2018-Jul-20                           | 56,1167663 | 47,262782   | 2018-Jul-20 | H5N8_1116   | AAAAA8AA | d  | Dom-gal    | maroon  |  |
| 320956_A_chicken_Cheboksary_853_2018_H5N8_2018-Jul-31                           | 56,1167663 | 47,262782   | 2018-Jul-31 | H5N8_1116   | AAAAA8AA | d  | Dom-gal    | maroon  |  |
| 320957_A_chicken_Cheboksary_854_2018_H5N8_2018-Jul-31                           | 56,1167663 | 47,262782   | 2018-Jul-31 | H5N8_1116   | AAAAA8AA | d  | Dom-gal    | maroon  |  |
| 320958_A_chicken_Tatarstan_7_2018_H5N8_2018-Aug-01                              | 55,1802364 | 50,7263945  | 2018-Aug-01 | H5N8_1116   | AAAAA8AA | d  | Dom-gal    | maroon  |  |
| 322179_A_domestic_duck_Germany-MV_AR613-102727_2018_H5N6_2018-Aug-31            | 53,8979416 | 11,4516022  | 2018-Aug-31 | H5N6_1217.2 | NA       | d  | Dom-ans    | fuchsia |  |

<sup>a</sup>Host species were categorized as either wild (w) or domestic (d).

<sup>b</sup>Host species were categorized as follows: domestic anseriform birds (Dom-ans), domestic galliform birds (Dom-gal), long-range migratory wild anseriform birds (Wild-ans-long), other wild anseriform birds (Wild-ans), and other wild birds (Wild-other).

**Movie S1 (separate file).** Video illustrating temporal and spatial spread across Eurasia of seven main H5 reassortant viruses from deduced site of origin. The video is based on the dataset (i) (Table S1). Reassortment clades (or subtype) were mapped for segments 1, 2, 3, 5, and 6 (segments 7 and 8 stayed the same) onto the tree of segment 4 independently, using discrete traits (asymmetric BSSVS [Bayesian Stochastic Search Variable Selection]). Subsequently, the full code was reconstructed at the nodes.

**Global Consortium for H5N8 and Related Influenza Viruses**

Samantha J. Lycett, Anne Pohlmann, Christoph Staubach, Valentina Caliendo, Steven van Borm, Andrew Breed, Francois-Xavier Briand, Ian Brown, Ádám Dán, Thomas DeLiberto, Sophie von Dobschuetz, Ron Fouchier, Marius Gilbert, Sarah Hill, Charlotte Kristiane Hjulsager, Hon Ip, Marion Koopmans, Lars Erik Larsen, Dong-Hun Lee, Mahmoud Mohamed Naguib, Isabella Monne, Oliver Pybus, Andrew Ramey, Vladimir Savic, Kirill Sharshov, Alexander Shestopalov, Chang-Seon Song, Mieke Steensels, David Swayne, Edyta Świątoń, XiuFeng Wan, Siamak Zohari, Mark Woolhouse, Martin Beer, Thijs Kuiken
