# Supplementary material for: Genesis and spread of multiple reassortants during the 2016/2017 H5 avian influenza epidemic in Eurasia
Source: PubMed Central journal article supplement — Proc Natl Acad Sci U S A. 2020 Aug 7;117(34):20814–25. doi: 10.1073/pnas.2001813117 (PMC7456104; doi:10.1073/pnas.2001813117), 2020-08-07
Supplement: pnas.2001813117.sapp02.pdf [file pnas.2001813117.sapp02.pdf]

**A .docx file containing only the names of the members of the group authorship (no affiliations or contributions included).**

Samantha J. Lycett  
Anne Pohlmann  
Christoph Staubach  
Valentina Caliendo  
Steven van Borm  
Andrew Breed  
Francois-Xavier Briand  
Ian Brown  
Ádám Dán  
Thomas DeLiberto  
Sophie von Dobschuetz  
Ron Fouchier  
Marius Gilbert  
Sarah Hill  
Charlotte Kristiane Hjulsager  
Hon Ip  
Marion Koopmans  
Lars Erik Larsen  
Dong-Hun Lee  
Mahmoud Mohamed Naguib  
Isabella Monne  
Oliver Pybus  
Andrew Ramey  
Vladimir Savic  
Kirill Sharshov  
Alexander Shestopalov  
Chang-Seon Song  
Mieke Steensels  
David Swayne  
Edyta Świętoń  
XiuFeng Wan  
Siamak Zohari  
Mark Woolhouse  
Martin Beer  
Thijs Kuiken
